# Supplementary material for: Combinatorial experimental and DFT theoretical investigation over the formation mechanism of a binuclear phthalocyanine dimer
Source: Royal Society of Chemistry journal article supplement (doi:10.1039/c7ra10678e), 2017-01-01
Supplement: c7ra10678e1.pdf [file c7ra10678e1.pdf]

## **Supporting Information**

### **Combinational Experimental and DFT Theoretical Investigation over the Formation Mechanism of Binuclear Phthalocyanine Dimer**

**Chiming Wang, Xin Chen, Qingyun Liu, Dongdong Qi,\* Kang Wang,\* and**

**Jianzhuang Jiang\***

## Contents

**Experimental General Remarks.**

**Computational Detail.**

**Spectroscopic characterization.**

**Scheme S1.** Synthesis of  $\pi$ -conjugated phthalocyanine oligomers through cyclotramerization pathway with 1,2,4,5-tetracyanobenzene or its bis(diiminoisoindole) counterpart as the necessary precursor.

**Figure S1.** Optimized geometries of **TS2** with NPA charge (q).

**FigureS2.** The minimum-energy crossing points (MECP) were identified by using the method of Harvey et al. M06-2X-D3/6-31+g(d,p) SCF energies were used to draw the energy profile. Energies are relative to **10t** and **12t**, respectively.

**Figure S3.** Free energy profile for the decomposition of the protonated  $\text{H}_2\text{O}_2$ , along with the relative free energies.

**Figure S4.** Optimized geometry of **TS22**. Key bond lengths are given in angstroms.

**Figure S5.** Photographs of Nessler's reagent with (left) and without (right) adding the 0.1 ml the aqueous solution combined during the synthesis procedure of **24-OR** from **1-OR** in mixed solvent of  $\text{CH}_2\text{Cl}_2$  and TFA in the ratio of 20:80.

**Figure S6.** Experimental (left) and simulated isotopic (right) pattern for the molecular ion of **9-OR** shown in the MALDI-TOF mass spectrum.

**Figure S7.**  $^1\text{H}$  NMR spectrum of **9-OR** recorded in  $\text{CDCl}_3$ . \*denotes the solvent impurity and the internal  $\text{SiMe}_4$ .

**Table S1.** The SCF energy of different spin states of intermediate **9**. Energies are given in Hartree

**References for Supporting Information.**

**Cartesian Coordinates (Å), SCF Energies, and Free Energies at 298.15 K and 1 atm for the Optimized Structures.**

**Experimental General Remarks:**

CH<sub>2</sub>Cl<sub>2</sub> for voltammetric studies was distilled from CaH<sub>2</sub> under nitrogen. Column chromatography was carried out on silica gel (Merck, Kieselgel 60, 70-230 mesh) with the indicated eluents. Nessler reagent,<sup>S1</sup> and **1-OR**,<sup>S2</sup> were prepared according to the published procedures. All other reagents and solvents were used as received.

<sup>1</sup>H NMR spectra were recorded on a Bruker DPX 400 spectrometer. Spectrum was referenced internally using the resonances of SiMe<sub>4</sub> ( $\delta = 0$  for <sup>1</sup>H NMR). Electronic absorption spectra were recorded on a Hitachi U-4100 spectrophotometer. IR spectra were recorded as KBr pellets using a Bruker Tensor 37 spectrometer with 2 cm<sup>-1</sup> resolution. Elemental analyses were performed on an Elementar Vavio El III. MALDI-TOF mass spectra were taken on a Bruker BIFLEX III ultrahigh-resolution Fourier transformion cyclotron resonance (FT-ICR) mass spectrometer with alpha-cyano-4-hydroxycinnamic acid as matrix. The software of Bruker Daltonics IsotopePattern was used for the simulated mass pattern.

### **Computational Detail:**

All structures are optimized at M06-2X/6-31+G(d,p)<sup>S3,S4</sup> level in the gas phase. The M06-2X method is chosen due to its validity for organic mechanistic studies together with the prediction of main-group thermochemistry and energy barrier heights.<sup>S3,S5</sup> Harmonic frequency analysis calculations at the same level were performed subsequently, to characterize the stationary points exhibit no imaginary frequency while the transition states exhibit one imaginary frequency. To get the improved energies, single-point calculations were carried out using the higher level of 6-311+G(2d,2p) basis set for all atoms in CH<sub>2</sub>Cl<sub>2</sub> solvent, employing the SMD solvent model.<sup>S6</sup> Gibbs free energies then were corrected to the refined energies at 298.15 K and 1 atm. In this study, we discuss the mechanism in terms of the corrected Gibbs free energies, which are given under corresponding compounds. All calculations were performed with Grimme-D3 dispersion corrections method.<sup>S7</sup> It should be emphasized that, to the best of our knowledge, since no standard quantum mechanics-based approach is valid to accurately calculate the entropy in solution, we employed the corrections based on “the theory of free volume”<sup>S8</sup> to the calculated free energies, i.e., for 2-to-1 reactions, a correction of -2.6 kcal/mol was made.

**Spectroscopic characterization:**

The MALDI-TOF mass spectrum of newly prepared binuclear phthalocyanine dimer **9-OR** clearly shows intense signals for the corresponding molecular ion  $[M]^+$ . The isotopic pattern closely resembled the simulated one as exemplified by the spectrum of **9-OR** given in Figure S1 in Supporting Information.

$^1\text{H}$  NMR spectrum was obtained for the metal free homobinuclear phthalocyanine dimer **9-OR** in  $\text{CDCl}_3$ , Figure S2 (Supporting Information). As can be seen, the signals appearing in the range from  $\delta = 9.5$  to  $8.0$  ppm can be assigned to the Pc  $\alpha$ -protons. The broad peak at  $\delta = 7.37$  and the multiplet from  $7.06$  to  $7.00$  ppm are attributed to the aromatic protons of the substituents, while the multiplets  $\delta 2.25$ - $2.58$  ppm are due to the methyl protons. The singlet signal appearing at  $\delta = -0.16$  is assigned to the inner protons of **9-OR**.

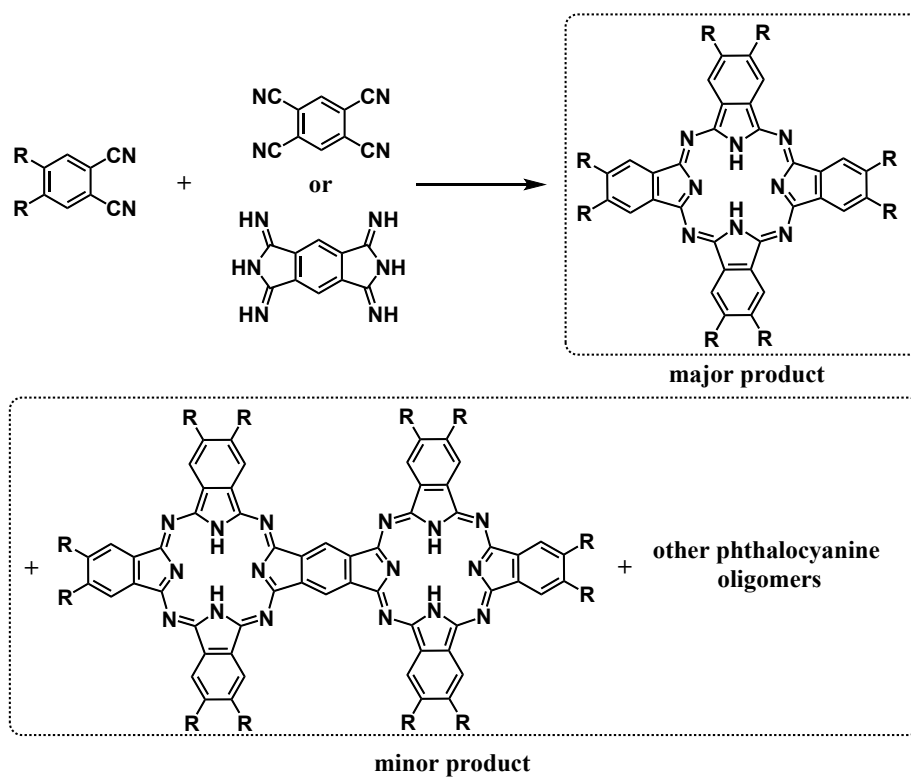

**Scheme S1.** Synthesis of  $\pi$ -conjugated phthalocyanine oligomers through cyclotetramerization pathway with 1,2,4,5-tetracyanobenzene or its bis(diiminoisoindole) counterpart as the necessary precursor.

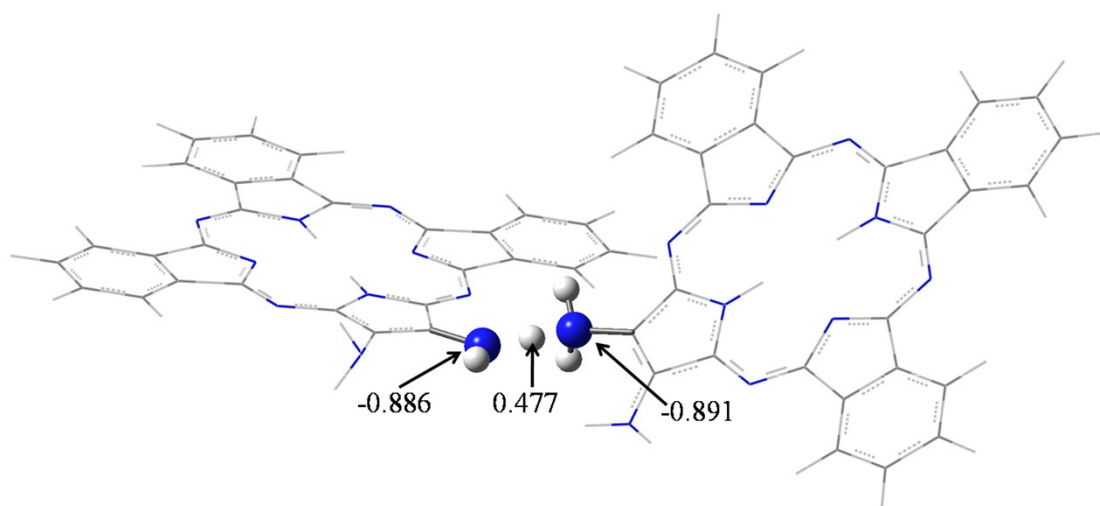

**Figure S1.** Optimized geometries of TS2 with NPA charge (q).



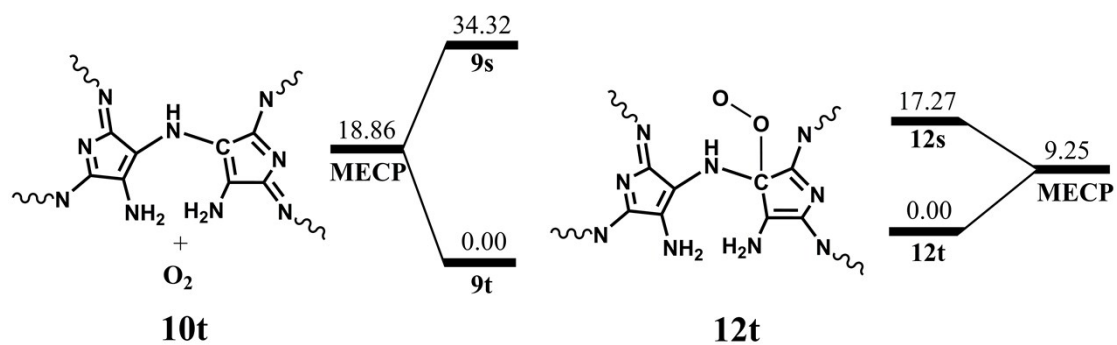

**Figure S2.** The minimum-energy crossing points (MECP) were identified by using the method of Harvey et al.<sup>S9, S10</sup> M06-2X-D3/6-31+g(d,p) SCF energies were used to draw the energy profile. Energies are relative to **10t** and **12t**, respectively.

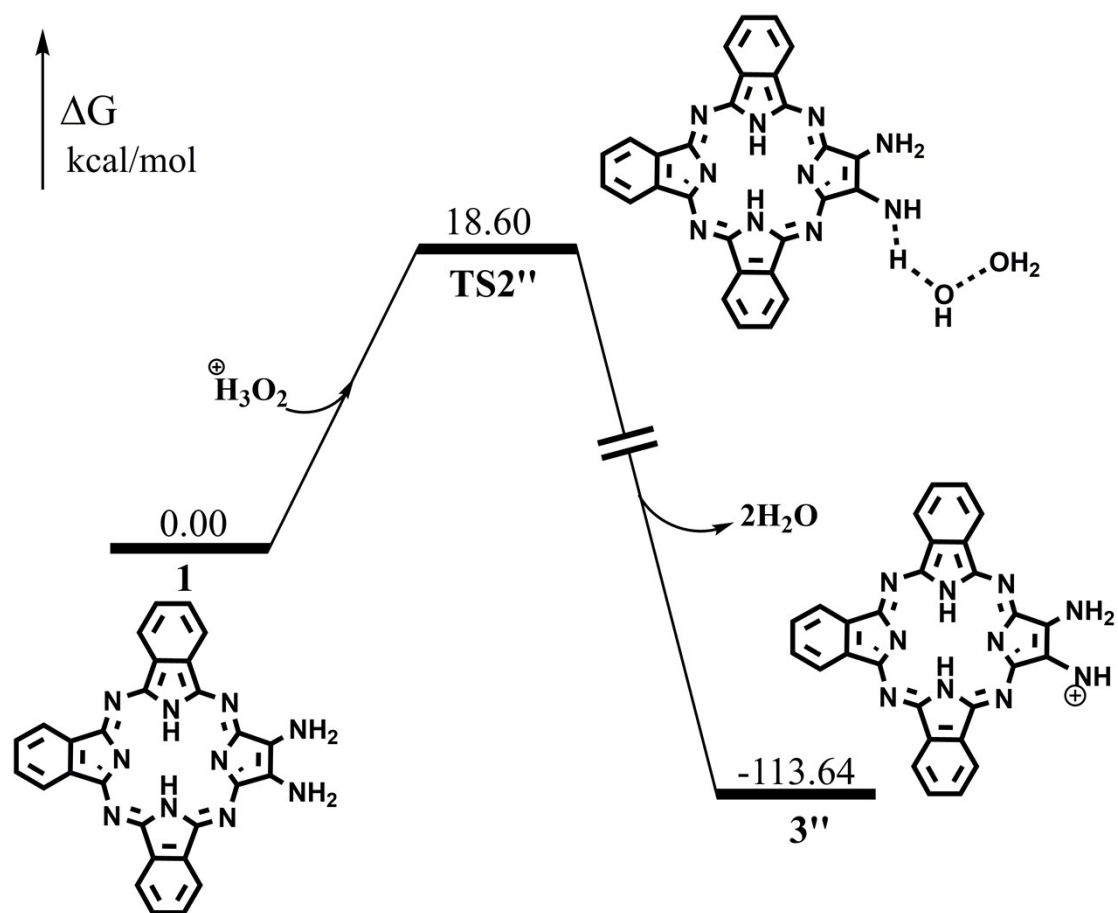

**Figure S3.** Free energy profile for the decomposition of the protonated  $\text{H}_2\text{O}_2$ , along with the relative free energies.

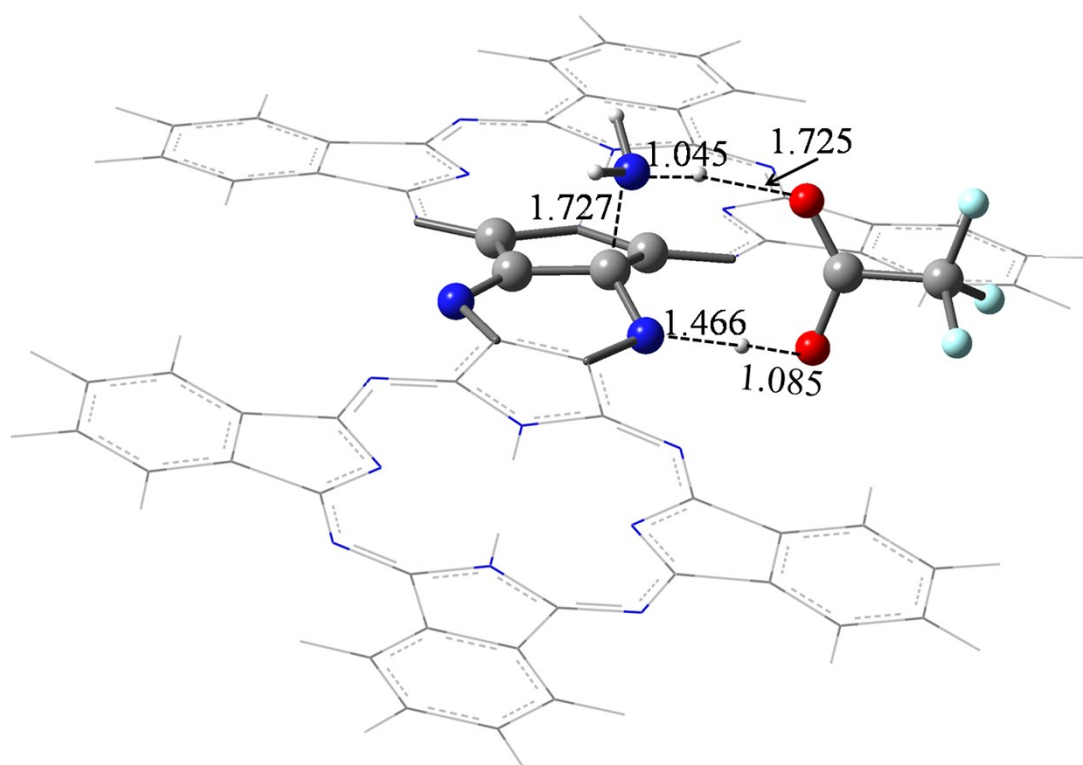

**Figure S4.** Optimized geometry of TS22. Key bond lengths are given in angstroms.

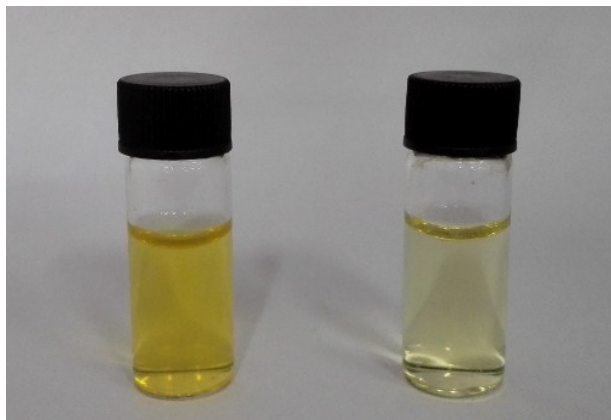

**Figure S5.** Photographs of Nessler's reagent with (left) and without (right) adding the 0.1 ml the aqueous solution combined during the synthesis procedure of **24-OR** from **1-OR** in mixed solvent of  $\text{CH}_2\text{Cl}_2$  and TFA in the ratio of 20:80.

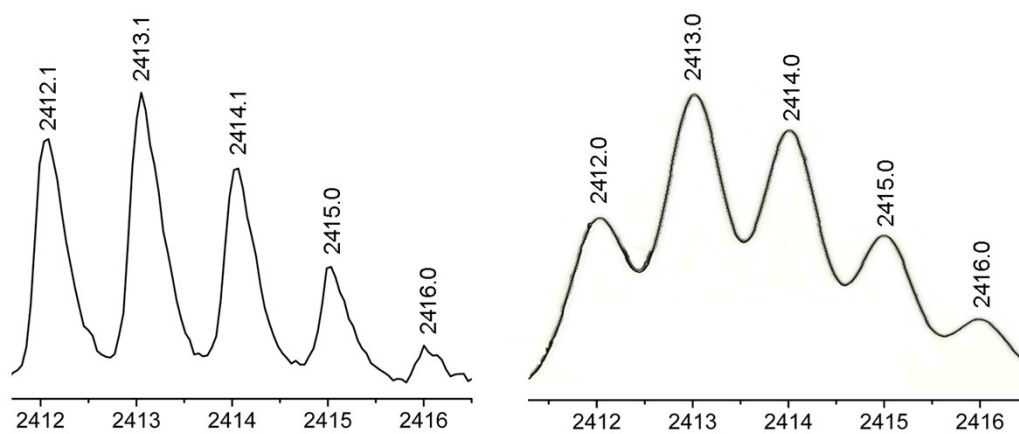

**Figure S6.** Experimental (left) and simulated isotopic (right) pattern for the molecular ion of **9-OR** shown in the MALDI-TOF mass spectrum.

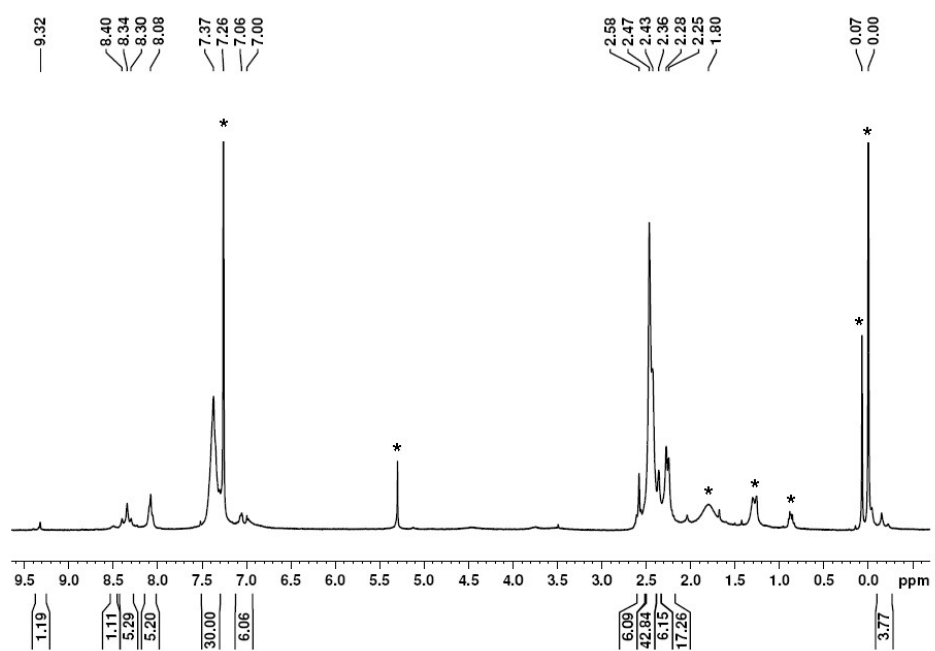

**Figure S7.**  $^1\text{H}$  NMR spectrum of **9-OR** recorded in  $\text{CDCl}_3$ . \*denotes the solvent impurity and the internal  $\text{SiMe}_4$ .

**Table S1.** The SCF energy on the basis of M06-2X/6-311+G(2d,2p) of different spin states of intermediate **10** and **12**. Energies are given in Hartree.

Intermediate **10**:

| Spin state | Singlet        | Triplet        | Quintet        | Septet         |
|------------|----------------|----------------|----------------|----------------|
| SCF energy | -3344.28316881 | -3344.33730314 | -3344.30424933 | -3344.27057885 |

Intermediate **12**:

| Spin state | Singlet        | Triplet        | Quintet        | Septet         |
|------------|----------------|----------------|----------------|----------------|
| SCF energy | -3344.28340384 | -3344.29878403 | -3344.26562230 | -3344.22868317 |

## References

- S1 A. P. Vanselow, *Ind. Eng. Chem. Anal. Ed.*, 1940, **12**, 516-517.
- S2 (a) D. Wöhrle, M. Eskes, K. Shigehara, A. Yamada, *Synthesis*, 1993, 194 -196;  
(b) H. Pan, C. Chen, K. Wang, W. Li, J. Jiang, *Chem. Eur. J.*, 2015, **21**, 3168-3173; (c) T. Ikeue, T. Fukahori, T. Mitsumune, K. Ueda, K. Fujii, S. Kurahashi, M. Koikawa, T. Sugimori, I. Hiromitsu, K. Yoshino, M. Mikuriya, M. Handa, *Inorg. Chim. Acta.*, 2014, **409**, 433–440.
- S3 Y. Zhao, D. G. Truhlar. *Theo. Chem. Acc.*, 2008, **120**, 215-241.
- S4 (a) T. Clark, J. Chandrasekhar, G. Spitznagel, P. Schleyer, *J. Comp. Chem.*, 1983, **4**, 294-301. (b) M. Frisch, J. Pople, J. Binkley, *J. Chem. Phys.*, 1984, **80**, 3265-3269.
- S5 (a) S. Qu, Y. Dang, C. Song, M. Wen, K. Huang, Z. Wang, *J. Am. Chem. Soc.* 2014, **136**, 4974-4991; (b) Y. Duan, Y. Liu, S. Bi, B. Ling, Y. Jiang, P. Liu, *Org. Chem.* **2016**, **81**, 9381-9388; (c) (e) C. Wang, X. Chen, D. Qi, S. Bi and J. Jiang, *Inorg. Chem. Comm.*, In press. (DOI: 10.1016/j.inoche.2017.04.025)
- S6 A. V. Marenich, C. J. Cramer, D. G. Truhlar. *J. Phys. Chem. B.*, 2009, **113**, 6378-6396.
- S7 (a) S. Grimme, *J. Comput. Chem.*, 2006, **27**, 1787-1799; (b) S. Grimme, *J. Chem. Phys.*, 2006, **124**, 034108; (c) S. Grimme, J. Antony, S. Ehrlich, H. Krieg, *J. Chem. Phys.*, 2010, **132**, 154104; (d) S. Grimme, S. Ehrlich, L. Georigk, *J. Comput. Chem.*, 2011, **32**, 1456-1465.
- S8 (a) Q. Liu, Y. Lan, J. Liu, G. Li, Y. Wu, A. Lei, *J. Am. Chem. Soc.* 2009, **113**,



10201-10210; (b) F. Schoenebeck, K. N. Houk, *J. Am. Chem. Soc.* 2010, **132**, 2496-2497; (c) B. Liu, M. Gao, L. Dang, H. Zhao, T. Marder, Z. Lin, *Organometallics*, 2012, **31**, 3410-3425. (d) Q. Zhou, Y. Li, *J. Am. Chem. Soc.*, 2015, **137**, 10182-10189.

S9 J. N. Harvey, M. Aschi, H. Schwarz, W. Koch, *Theor. Chem. Acc.* 1998, **99**, 95.

S10 Y. Dang, X. Deng, J. Guo, C. Song, W. Hu, Z. Wang, *J. Am. Chem. Soc.* 2016, **138**, 2712–2723

**Cartesian Coordinates (Å), SCF Energies, and Free Energies at 298.15 K and 1 atm for the Optimized Structures.**

All energies are given in Hartree

1

SCF energy in solution: -1625.287087

Free energy in solution: -1624.917362

|   |             |             |             |
|---|-------------|-------------|-------------|
| C | -4.12760405 | -0.46874999 | 0.00000000  |
| C | -4.13280005 | -2.65272399 | 0.00365300  |
| C | -2.07791705 | 2.60466801  | -0.00132700 |
| C | -0.67517705 | 2.60471201  | -0.00105000 |
| C | -2.51822005 | 1.21494901  | -0.00131100 |
| C | -0.23480905 | 1.21502201  | -0.00132900 |
| H | -1.37633705 | -0.56200699 | -0.00185800 |
| C | 2.78964695  | -0.85808699 | -0.00110300 |
| C | 2.79270395  | -2.25613999 | -0.00279000 |
| C | 1.37460295  | -0.46863599 | -0.00278100 |
| C | 1.37975795  | -2.65263699 | -0.00623900 |
| C | -0.68725005 | -5.67568699 | -0.00425800 |
| C | -2.06569105 | -5.67570699 | 0.00235500  |
| C | -0.25592305 | -4.30386299 | -0.01065300 |
| C | -2.49702405 | -4.30379799 | 0.00826400  |
| H | -1.37647405 | -2.50734399 | -0.00016400 |
| N | 1.01000395  | -3.92506099 | -0.00971300 |
| N | -3.76298905 | -3.92518599 | 0.00741100  |
| N | -3.76593405 | 0.82187701  | -0.00150400 |
| N | 1.01292495  | 0.82198001  | -0.00116900 |
| N | -1.37649205 | 0.45033601  | -0.00152400 |
| N | 0.56970495  | -1.54985799 | -0.00592000 |
| N | -1.37649605 | -3.51530599 | -0.00158400 |
| N | -3.32271305 | -1.54998599 | 0.00327800  |
| N | 0.16583695  | -6.76668599 | -0.06131900 |
| H | 1.13650495  | -6.49898099 | 0.05676300  |
| H | -0.09376805 | -7.52412599 | 0.55998800  |
| N | -2.91875605 | -6.76661499 | 0.05937200  |
| H | -2.65988905 | -7.52384299 | -0.56248700 |
| H | -3.88961305 | -6.49889799 | -0.05705900 |
| C | -5.54263905 | -0.85818499 | -0.00199800 |
| C | -5.54570905 | -2.25625499 | -0.00017100 |

|   |             |             |             |
|---|-------------|-------------|-------------|
| C | -6.73566205 | -2.97672599 | 0.00033500  |
| C | -7.92510505 | -2.25026199 | -0.00225900 |
| C | -7.92104905 | -0.84562099 | -0.00488000 |
| C | -6.72637305 | -0.12790599 | -0.00451200 |
| H | -6.73123605 | -4.06186199 | 0.00363600  |
| H | -8.87461005 | -2.77631999 | -0.00181200 |
| H | -8.86717505 | -0.31366299 | -0.00670600 |
| H | -6.71115505 | 0.95713601  | -0.00578800 |
| C | 0.04904795  | 3.79601001  | -0.00082900 |
| C | -0.67255205 | 4.98345201  | -0.00074600 |
| C | -2.08068705 | 4.98340701  | -0.00098800 |
| C | -2.80221505 | 3.79592001  | -0.00124600 |
| H | 1.13379795  | 3.78217101  | -0.00066500 |
| H | -0.14460205 | 5.93162401  | -0.00051600 |
| H | -2.60869705 | 5.93154501  | -0.00093600 |
| H | -3.88696505 | 3.78201601  | -0.00138100 |
| C | 5.17207495  | -2.25025299 | -0.00133000 |
| C | 3.98260095  | -2.97668199 | -0.00355100 |
| C | 3.97340395  | -0.12784699 | 0.00101200  |
| C | 5.16805295  | -0.84561899 | 0.00115100  |
| H | 6.12157395  | -2.77632299 | -0.00196000 |
| H | 3.97807195  | -4.06181699 | -0.00676100 |
| H | 3.95825295  | 0.95719601  | 0.00216800  |
| H | 6.11419795  | -0.31369099 | 0.00268800  |

1-ion

SCF energy in solution: -1625.714519

Free energy in solution: -1625.330479

|   |             |             |             |
|---|-------------|-------------|-------------|
| C | -1.33535664 | 0.62974202  | 0.00000000  |
| C | -1.30283664 | -1.55639998 | -0.00012800 |
| C | -3.35522864 | 3.74139702  | 0.00014200  |
| C | -4.75324164 | 3.75053902  | 0.00007600  |
| C | -2.92002664 | 2.33678102  | 0.00001200  |
| C | -5.20630964 | 2.35247602  | -0.00008700 |
| H | -4.07825264 | 0.56391602  | -0.00053400 |
| C | -8.24914164 | 0.32022102  | -0.00030000 |
| C | -8.29033064 | -1.07372298 | -0.00001800 |
| C | -6.81765364 | 0.67455902  | -0.00018800 |
| C | -6.87979464 | -1.50811698 | 0.00014900  |
| C | -4.78890064 | -4.46928898 | 0.00030600  |
| C | -3.39962564 | -4.53190998 | 0.00019900  |
| C | -5.22700464 | -3.14561498 | 0.00023200  |
| C | -2.96003564 | -3.19513298 | 0.00005400  |

|   |              |             |             |
|---|--------------|-------------|-------------|
| H | -4.05816064  | -1.38995898 | 0.00009000  |
| N | -6.52495164  | -2.75596098 | 0.00030600  |
| N | -1.66530764  | -2.79846298 | -0.00005300 |
| N | -1.68736664  | 1.94582602  | 0.00000200  |
| N | -6.44920364  | 1.98068402  | -0.00019500 |
| N | -4.07151164  | 1.57535902  | -0.00003600 |
| N | -6.03332064  | -0.39661098 | -0.00009700 |
| N | -4.08232164  | -2.40078398 | 0.00004600  |
| N | -2.13548564  | -0.42586698 | 0.00000800  |
| N | -5.60946664  | -5.66497898 | 0.00043900  |
| H | -6.21124764  | -5.72601998 | 0.82868700  |
| H | -6.21130864  | -5.72616398 | -0.82775500 |
| N | -2.70663664  | -5.76729498 | 0.00024200  |
| H | -2.10642364  | -5.85487598 | 0.81666500  |
| H | -2.10663464  | -5.85505098 | -0.81631900 |
| C | 0.08979636   | 0.25749602  | -0.00012900 |
| C | 0.11159436   | -1.13673198 | -0.00016900 |
| C | 1.30539436   | -1.84106098 | -0.00027300 |
| C | 2.48667736   | -1.09298198 | -0.00035300 |
| C | 2.46320336   | 0.30724102  | -0.00032900 |
| C | 1.25523036   | 1.00970002  | -0.00022400 |
| H | 1.31916336   | -2.92584098 | -0.00030500 |
| H | 3.44320836   | -1.60530898 | -0.00044500 |
| H | 3.40083736   | 0.85293902  | -0.00039500 |
| H | 1.22419136   | 2.09403902  | -0.00019200 |
| C | -5.47341464  | 4.93583502  | 0.00022700  |
| C | -4.74019464  | 6.12433202  | 0.00045200  |
| C | -3.33919664  | 6.11520802  | 0.00050800  |
| C | -2.62065864  | 4.91751902  | 0.00035100  |
| H | -6.55800964  | 4.93034102  | 0.00015900  |
| H | -5.26317164  | 7.07474902  | 0.00057000  |
| H | -2.80406064  | 7.05885902  | 0.00066700  |
| H | -1.53621364  | 4.89857102  | 0.00042100  |
| C | -10.66587064 | -0.99504898 | -0.00022700 |
| C | -9.49472464  | -1.75951698 | 0.00000400  |
| C | -9.40304864  | 1.08864602  | -0.00057500 |
| C | -10.62186464 | 0.40407302  | -0.00050200 |
| H | -11.62957564 | -1.49368098 | -0.00020000 |
| H | -9.52812264  | -2.84390698 | 0.00021400  |
| H | -9.35555664  | 2.17237102  | -0.00077000 |
| H | -11.55126564 | 0.96361802  | -0.00068400 |
| H | -4.93870664  | -6.45530198 | 0.00048000  |

TS2

SCF energy in solution: -3250.5558

Free energy in solution: -3249.794929

|   |              |             |            |
|---|--------------|-------------|------------|
| C | -6.78385398  | -2.65624996 | 0.00000000 |
| C | -5.89231798  | -3.73158196 | 0.13445400 |
| C | -8.08092198  | -3.16171996 | 0.43188100 |
| C | -6.69873398  | -4.83801796 | 0.65203900 |
| C | -11.56109898 | -1.98223296 | 0.79538800 |
| C | -12.61162498 | -2.78829896 | 1.26918300 |
| C | -10.35645198 | -2.78826396 | 0.79964700 |
| C | -12.05809798 | -4.09493896 | 1.56847000 |
| H | -10.09065098 | -4.80988796 | 1.38848900 |
| C | -12.99828898 | -7.41257996 | 2.82724000 |
| C | -12.10690798 | -8.47248596 | 2.98742100 |
| C | -12.19346298 | -6.29641596 | 2.29849800 |
| C | -10.79388998 | -7.96038596 | 2.54781300 |
| C | -7.34976498  | -9.13467096 | 2.24198600 |
| C | -6.28131998  | -8.37375596 | 1.75362700 |
| C | -8.51557798  | -8.33693396 | 2.19463700 |
| C | -6.84490198  | -7.04672796 | 1.39908400 |
| H | -8.82548398  | -6.32759096 | 1.55892300 |
| N | -9.72538698  | -8.73614896 | 2.58388700 |
| N | -6.15353498  | -6.04484196 | 0.92558200 |
| N | -9.16715498  | -2.39038396 | 0.42436500 |
| N | -12.74971598 | -5.12113196 | 2.03897300 |
| N | -10.73000698 | -4.03262896 | 1.27187200 |
| N | -10.89522198 | -6.66224096 | 2.14529000 |
| N | -8.18237398  | -7.09559696 | 1.68411700 |
| N | -7.98628198  | -4.46888996 | 0.81378900 |
| N | -1.60006398  | -9.33556396 | 0.01306700 |
| N | -3.45807598  | -6.91945596 | 0.72795200 |
| C | -0.25237098  | -1.70677296 | 2.71767200 |
| C | 0.89743702   | -2.60316296 | 2.51800000 |
| C | -0.86303298  | -3.78786196 | 2.00661600 |
| C | 4.57734002   | -2.53253496 | 2.84497300 |
| C | 5.40356302   | -3.63050696 | 2.57224800 |
| C | 3.19719402   | -2.94477696 | 2.59509400 |
| C | 4.54502402   | -4.73573396 | 2.14871200 |
| H | 2.43925302   | -4.79951196 | 1.93745800 |
| C | 4.66803602   | -8.23273896 | 1.06174300 |
| C | 3.55270002   | -9.00257196 | 0.71564100 |
| C | 4.13766102   | -6.91596896 | 1.42782500 |
| C | 2.39704502   | -8.11804396 | 0.88707200 |
| C | -1.24981198  | -8.11867196 | 0.52538200 |

|   |              |              |             |
|---|--------------|--------------|-------------|
| C | -2.04029098  | -7.02353196  | 0.81578900  |
| C | 0.11135802   | -7.72164296  | 0.79200700  |
| C | -1.20226498  | -5.96337396  | 1.25675200  |
| H | 0.89505902   | -5.89058496  | 1.49933400  |
| N | 1.16024002   | -8.51156696  | 0.64083500  |
| N | -1.65473598  | -4.76331996  | 1.62070500  |
| N | 2.15107702   | -2.17723896  | 2.75132100  |
| N | 4.96282402   | -5.92134296  | 1.81429800  |
| N | 3.25358302   | -4.25259396  | 2.18608900  |
| N | 2.80163102   | -6.87514796  | 1.31833000  |
| N | 0.08093702   | -6.42050196  | 1.22705700  |
| N | 0.51012802   | -3.81758296  | 2.10012400  |
| N | -7.21676198  | -10.47043496 | 2.69815000  |
| H | -7.53843998  | -10.56240196 | 3.65722400  |
| H | -7.77390298  | -11.10758096 | 2.13621600  |
| H | -0.87963198  | -10.04384596 | 0.05555800  |
| H | -2.54147198  | -9.66157096  | 0.18185600  |
| N | -5.00483198  | -8.70330096  | 1.62072000  |
| H | -4.82458598  | -9.63707496  | 1.98020500  |
| H | -3.79321298  | -6.79245196  | -0.23047400 |
| H | -3.79224498  | -6.09621796  | 1.23742600  |
| H | -4.13864198  | -7.83478596  | 1.18837000  |
| C | -13.87354598 | -9.84065696  | 3.79898800  |
| C | -12.52258798 | -9.70437796  | 3.47466800  |
| C | -14.34365498 | -7.53863696  | 3.14756000  |
| C | -14.77024798 | -8.77408096  | 3.63772600  |
| H | -14.24045398 | -10.78734696 | 4.18318300  |
| H | -11.81878598 | -10.52156196 | 3.59500800  |
| H | -15.02775098 | -6.70622296  | 3.01867900  |
| H | -15.81407498 | -8.91563296  | 3.89999900  |
| C | -11.78662098 | -0.65483396  | 0.42017500  |
| C | -13.07955298 | -0.16614596  | 0.53359400  |
| C | -14.13318198 | -0.97571596  | 1.00979500  |
| C | -13.91353798 | -2.29308796  | 1.38238900  |
| H | -10.97084598 | -0.04013296  | 0.05454700  |
| H | -13.29071598 | 0.86043904   | 0.25103100  |
| H | -15.13088698 | -0.55503496  | 1.08323400  |
| H | -14.71300298 | -2.92793996  | 1.74978900  |
| C | -4.54519098  | -3.58248196  | -0.20454100 |
| C | -4.12059298  | -2.34199796  | -0.66892500 |
| C | -5.01802098  | -1.26616196  | -0.79635100 |
| C | -6.36090798  | -1.41119696  | -0.46469000 |
| H | -3.82709198  | -4.38801896  | -0.09406600 |
| H | -3.07502598  | -2.19784896  | -0.92428600 |

|   |             |              |             |
|---|-------------|--------------|-------------|
| H | -4.65135298 | -0.31068196  | -1.15839800 |
| H | -7.06493098 | -0.59065796  | -0.55991000 |
| C | -2.66129498 | -1.93661096  | 2.47635000  |
| C | -1.37959698 | -2.46682696  | 2.39593100  |
| C | -0.35895798 | -0.38416896  | 3.12787300  |
| C | -1.64326898 | 0.15758504   | 3.20479500  |
| C | -2.77506198 | -0.60624896  | 2.88423000  |
| H | -3.53488398 | -2.52852496  | 2.22247300  |
| H | 0.52316802  | 0.19699504   | 3.37568900  |
| H | -1.77204198 | 1.18845204   | 3.51902000  |
| H | -3.75923598 | -0.15373796  | 2.95266600  |
| C | 6.78543502  | -3.55082096  | 2.72007300  |
| C | 7.31301902  | -2.33683996  | 3.14909100  |
| C | 6.48336902  | -1.23492296  | 3.42270800  |
| C | 5.10243202  | -1.31699596  | 3.27486200  |
| H | 7.41492902  | -4.40800596  | 2.50630500  |
| H | 8.38586102  | -2.23460896  | 3.27637700  |
| H | 6.93248002  | -0.30485396  | 3.75549700  |
| H | 4.45014202  | -0.47552696  | 3.48277200  |
| C | 5.95694302  | -8.75469796  | 1.01516900  |
| C | 6.09588702  | -10.08011096 | 0.60900400  |
| C | 4.97641802  | -10.85426796 | 0.26049600  |
| C | 3.68782102  | -10.32639996 | 0.30838900  |
| H | 6.81410402  | -8.14689096  | 1.28586900  |
| H | 7.08410002  | -10.52606096 | 0.55923700  |
| H | 5.12219802  | -11.88338596 | -0.05232400 |
| H | 2.82019402  | -10.91968896 | 0.03887900  |

3+4

SCF energy in solution: -3250.565138

Free energy in solution: -3249.804196

|   |             |             |             |
|---|-------------|-------------|-------------|
| C | -1.97657483 | 0.73643410  | 0.02587468  |
| C | -2.32754083 | -1.41338890 | -0.16650832 |
| C | 0.46817017  | 3.46810710  | 0.55245268  |
| C | 1.84461217  | 3.25974410  | 0.66853868  |
| C | -0.15648383 | 2.16564310  | 0.28152968  |
| C | 2.09542917  | 1.82882810  | 0.46321168  |
| H | 0.74447417  | 0.27383810  | -0.02809532 |
| C | 4.79157717  | -0.63913090 | 0.50074368  |
| C | 4.62105117  | -2.01697190 | 0.37100368  |
| C | 3.43672217  | -0.06596690 | 0.43206468  |
| C | 3.16618317  | -2.22089090 | 0.23457868  |
| C | 0.69545417  | -4.80164090 | -0.36044732 |

|   |             |             |             |
|---|-------------|-------------|-------------|
| C | -0.67975383 | -4.63977090 | -0.44573232 |
| C | 1.29863717  | -3.57167790 | -0.05327332 |
| C | -0.92827483 | -3.27018190 | -0.20493632 |
| H | 0.40785017  | -1.68208990 | 0.22496768  |
| N | 2.63120917  | -3.39543090 | 0.08113068  |
| N | -2.14612083 | -2.69600390 | -0.25699132 |
| N | -1.43382283 | 1.97348110  | 0.17969668  |
| N | 3.26493217  | 1.27231310  | 0.54656768  |
| N | 0.87118417  | 1.24998310  | 0.21409368  |
| N | 2.50240517  | -0.99956890 | 0.28480968  |
| N | 0.28355617  | -2.66861090 | 0.03796568  |
| N | -1.34717583 | -0.42905990 | -0.01687932 |
| N | 1.44513617  | -5.93453690 | -0.85444132 |
| H | 1.85431217  | -5.65461290 | -1.75226032 |
| H | 2.20060317  | -6.19737390 | -0.21682732 |
| N | -1.59552683 | -5.64676590 | -0.82029132 |
| H | -2.42373483 | -5.22054890 | -1.22884732 |
| H | -1.90504483 | -6.18630890 | -0.01528032 |
| C | -3.43880183 | 0.58214410  | -0.07860532 |
| C | -3.66190083 | -0.79000490 | -0.20446032 |
| C | -4.94449783 | -1.30404190 | -0.32577732 |
| C | -6.00345983 | -0.39242090 | -0.31598732 |
| C | -5.77739983 | 0.98420410  | -0.18887032 |
| C | -4.48276383 | 1.49507710  | -0.07012232 |
| H | -5.11276783 | -2.37170490 | -0.42378832 |
| H | -7.02259583 | -0.75520890 | -0.40845332 |
| H | -6.62420783 | 1.66348110  | -0.18948232 |
| H | -4.29109883 | 2.55966410  | 0.01658268  |
| C | 2.72081417  | 4.30772710  | 0.91918868  |
| C | 2.16807717  | 5.58020710  | 1.05215768  |
| C | 0.78472917  | 5.78751010  | 0.94043668  |
| C | -0.09028383 | 4.73150310  | 0.68893868  |
| H | 3.79000717  | 4.13232010  | 0.98183568  |
| H | 2.81912517  | 6.43068310  | 1.22645468  |
| H | 0.39339117  | 6.79534110  | 1.03682268  |
| H | -1.15991483 | 4.87823910  | 0.58387668  |
| C | 6.97397717  | -2.31286690 | 0.50356468  |
| C | 5.70468817  | -2.88153290 | 0.36959968  |
| C | 6.04749817  | -0.06393590 | 0.62558768  |
| C | 7.14445717  | -0.92804490 | 0.62728568  |
| H | 7.85075017  | -2.95317490 | 0.49290368  |
| H | 5.56907417  | -3.95190590 | 0.25346068  |
| H | 6.16346017  | 1.01313710  | 0.69415668  |
| H | 8.14764517  | -0.52125490 | 0.70328468  |



|   |             |             |             |
|---|-------------|-------------|-------------|
| H | 0.81513617  | -6.72891190 | -0.99640132 |
| C | -0.71907383 | 2.08254610  | -2.92951832 |
| C | -1.04712783 | -0.07661790 | -3.14842032 |
| C | 1.76426617  | 4.75089710  | -2.43916532 |
| C | 3.14894017  | 4.52139310  | -2.30313032 |
| C | 1.12189817  | 3.46664410  | -2.60453232 |
| C | 3.36600917  | 3.09778110  | -2.38511432 |
| H | 1.95082917  | 1.53665710  | -2.66928532 |
| C | 6.02708517  | 0.57355810  | -2.55132932 |
| C | 5.80127517  | -0.79940690 | -2.72841032 |
| C | 4.70395317  | 1.18482510  | -2.48792932 |
| C | 4.34898117  | -0.95730790 | -2.75817132 |
| C | 1.82948217  | -3.66255390 | -3.13350432 |
| C | 0.45349817  | -3.38029790 | -3.30796632 |
| C | 2.49269917  | -2.32878090 | -2.98928132 |
| C | 0.27577017  | -1.99963890 | -3.18541932 |
| H | 1.66259817  | -0.38702790 | -2.95840532 |
| N | 3.77825517  | -2.18269990 | -2.89643232 |
| N | -0.90804883 | -1.38344390 | -3.25513132 |
| N | -0.18630083 | 3.28353310  | -2.76827032 |
| N | 4.53325617  | 2.49202110  | -2.35517532 |
| N | 2.11135317  | 2.53140110  | -2.55882832 |
| N | 3.72637317  | 0.22410810  | -2.62436332 |
| N | 1.51233017  | -1.38326890 | -2.97606732 |
| N | -0.09136883 | 0.87807610  | -2.93850232 |
| N | 2.42345717  | -4.83313990 | -3.01896432 |
| H | 3.42861017  | -4.67094290 | -2.92208432 |
| N | -0.56736383 | -4.28440690 | -3.61679232 |
| H | -1.48041283 | -3.86277690 | -3.47898832 |
| H | -0.50011383 | -5.17200590 | -3.13325432 |
| C | -2.17146783 | 1.91869510  | -3.12749432 |
| C | -2.37971583 | 0.54713810  | -3.26679232 |
| C | -3.65054183 | 0.02203110  | -3.46926132 |
| C | -4.71315383 | 0.92309610  | -3.52968532 |
| C | -4.50191083 | 2.30443310  | -3.39502832 |
| C | -3.22382583 | 2.82393210  | -3.18919932 |
| H | -3.80047583 | -1.04883990 | -3.56690832 |
| H | -5.72327483 | 0.55294310  | -3.67667932 |
| H | -5.35332783 | 2.97673010  | -3.44649332 |
| H | -3.04671683 | 3.88921510  | -3.08025832 |
| C | 4.03638317  | 5.59000810  | -2.12340032 |
| C | 3.50704217  | 6.87019310  | -2.08857332 |
| C | 2.11947317  | 7.09936610  | -2.23346632 |
| C | 1.23649117  | 6.04657810  | -2.40901332 |

|   |            |             |             |
|---|------------|-------------|-------------|
| H | 5.10121617 | 5.40695210  | -2.02073532 |
| H | 4.16989017 | 7.71999410  | -1.95545332 |
| H | 1.74606017 | 8.11840810  | -2.20753132 |
| H | 0.16799217 | 6.20341810  | -2.51947632 |
| C | 8.15129517 | -1.18850690 | -2.77688132 |
| C | 6.85837117 | -1.69951390 | -2.84545832 |
| C | 7.32147017 | 1.08690310  | -2.48125632 |
| C | 8.37867117 | 0.18832210  | -2.59432532 |
| H | 9.00091517 | -1.85881390 | -2.86654732 |
| H | 6.66930017 | -2.75970190 | -2.98393232 |
| H | 7.48908217 | 2.15127010  | -2.34820732 |
| H | 9.40039117 | 0.55385510  | -2.54891832 |

TS5

SCF energy in solution: -3250.502572

Free energy in solution: -3249.740674

|   |             |             |             |
|---|-------------|-------------|-------------|
| C | -0.32299742 | 0.32296973  | 0.00422789  |
| C | -1.59749342 | -1.55827527 | -0.21374011 |
| C | 0.47146158  | -0.86830927 | -0.28963111 |
| C | -3.85597042 | -4.45640927 | -0.50311611 |
| C | -2.69161442 | -3.60265427 | -0.49229311 |
| C | -1.99119342 | -5.70865827 | -1.00580211 |
| H | -0.66540642 | -4.08018227 | -0.87078511 |
| C | 0.88621858  | -7.83328527 | -1.86429611 |
| C | 2.19844458  | -7.37122227 | -1.97173011 |
| C | 0.08020758  | -6.65750727 | -1.49209411 |
| C | 2.14110858  | -5.93256227 | -1.65531511 |
| C | 4.38197858  | -3.05616827 | -1.35876511 |
| C | 3.97507158  | -1.87096127 | -0.73997011 |
| C | 3.25099958  | -3.91209727 | -1.32794011 |
| C | 2.51976158  | -1.88342227 | -0.65088711 |
| H | 1.20827858  | -3.52088027 | -0.87445111 |
| N | 3.24576258  | -5.19237327 | -1.67254411 |
| N | 1.82017358  | -0.81561627 | -0.40284311 |
| N | -2.68625142 | -2.30901127 | -0.23934811 |
| N | -1.22546342 | -6.74690627 | -1.32470111 |
| N | -1.61849642 | -4.41272027 | -0.79865511 |
| N | 0.87170558  | -5.55025227 | -1.37270511 |
| N | 2.15828858  | -3.17741227 | -0.87554711 |
| N | -0.29888042 | -1.95897827 | -0.41634011 |
| N | 4.35419358  | -4.87041027 | 1.86345389  |
| N | 4.29165558  | -1.93802227 | 1.26063689  |
| C | 9.82047058  | 0.38767673  | -1.18221911 |

|   |             |             |             |
|---|-------------|-------------|-------------|
| C | 8.51611058  | 0.46762273  | -0.67938211 |
| C | 10.26619058 | -0.97945527 | -0.90279111 |
| C | 8.23451358  | -0.85760927 | -0.12432411 |
| C | 13.23901558 | -3.11380727 | -1.38148711 |
| C | 11.90557758 | -2.62469327 | -1.06339411 |
| C | 11.97253458 | -4.84004627 | -0.52057911 |
| H | 10.24289558 | -3.65842427 | -0.26123611 |
| C | 10.05661258 | -7.70809827 | 0.72489689  |
| C | 8.72593058  | -7.64681627 | 1.14728089  |
| C | 10.41534958 | -6.33257627 | 0.35627989  |
| C | 8.34036158  | -6.23566527 | 1.02991689  |
| C | 5.41267358  | -4.08823727 | 1.50700289  |
| C | 5.41082958  | -2.70059927 | 1.33993789  |
| C | 6.74830458  | -4.55727227 | 1.27819389  |
| C | 6.74631758  | -2.34340227 | 0.91026389  |
| H | 8.50919958  | -3.50821427 | 0.70277089  |
| N | 7.11993458  | -5.82152227 | 1.33993489  |
| N | 7.05176558  | -1.14995227 | 0.42434089  |
| N | 11.48725658 | -1.39791527 | -1.24934311 |
| N | 11.63020258 | -6.04057627 | -0.12179911 |
| N | 11.21146258 | -3.69848927 | -0.55543811 |
| N | 9.38193958  | -5.48700327 | 0.55598289  |
| N | 7.52747958  | -3.46445727 | 0.93315389  |
| N | 9.29740458  | -1.68715727 | -0.27362411 |
| N | 5.66777558  | -3.28182327 | -1.90853211 |
| H | 5.59465358  | -3.84893027 | -2.74779511 |
| H | 6.30355958  | -3.76551227 | -1.27641511 |
| H | 4.40479558  | -5.84293427 | 1.59302289  |
| H | 3.44819758  | -4.43250527 | 1.75312389  |
| N | 4.67427858  | -0.60857827 | -0.98199111 |
| H | 4.92113158  | -0.52864527 | -1.97449311 |
| H | 4.04038958  | 0.15517873  | -0.71390711 |
| H | 4.50075058  | -0.96224027 | 1.47998989  |
| H | 5.57573458  | -0.58949627 | -0.41691811 |
| C | -5.20885742 | -4.18633727 | -0.26442411 |
| C | -3.42285242 | -5.75976827 | -0.81825311 |
| C | -4.32817742 | -6.82387227 | -0.90426311 |
| C | -5.66483442 | -6.55011927 | -0.66789311 |
| C | -6.09993542 | -5.24292327 | -0.35095011 |
| H | -5.53380942 | -3.18023327 | -0.02119411 |
| H | -3.98026442 | -7.82216827 | -1.14819911 |
| H | -6.39613042 | -7.34996427 | -0.72549311 |
| H | -7.15635842 | -5.06890027 | -0.17218111 |
| C | -1.04168342 | 2.54181873  | 0.48881289  |

|   |             |              |             |
|---|-------------|--------------|-------------|
| C | 0.00199058  | 1.66002173   | 0.22255989  |
| C | -1.65055942 | -0.12173727  | 0.05565589  |
| C | -2.69677842 | 0.75824673   | 0.32260589  |
| C | -2.37445742 | 2.09535173   | 0.53769689  |
| H | -0.82782742 | 3.59141273   | 0.66462289  |
| H | 1.03295658  | 1.99790473   | 0.18872789  |
| H | -3.72212642 | 0.40488773   | 0.36104789  |
| H | -3.16360142 | 2.81006873   | 0.74951589  |
| C | 14.35271958 | -2.46591127  | -1.91613911 |
| C | 15.50366158 | -3.22073027  | -2.10292011 |
| C | 15.54593758 | -4.58759527  | -1.76470211 |
| C | 14.43752258 | -5.23300827  | -1.23158211 |
| C | 13.28166258 | -4.47542027  | -1.04426511 |
| H | 14.30860358 | -1.41259527  | -2.17188211 |
| H | 16.39051158 | -2.75198527  | -2.51711911 |
| H | 16.46432558 | -5.14302827  | -1.92506211 |
| H | 14.45665458 | -6.28472927  | -0.96632011 |
| C | 8.39096758  | 2.74634873   | -1.36947911 |
| C | 9.69553658  | 2.65955273   | -1.88505811 |
| C | 10.42991658 | 1.47950473   | -1.79385211 |
| C | 7.78612858  | 1.65214873   | -0.75551711 |
| H | 7.85317058  | 3.68620973   | -1.44374911 |
| H | 10.13768258 | 3.53277073   | -2.35387511 |
| H | 11.44160958 | 1.40581573   | -2.17927511 |
| H | 6.79038558  | 1.73259373   | -0.32726211 |
| C | 3.24522258  | -8.22059527  | -2.30728111 |
| C | 2.93133858  | -9.56065127  | -2.53839011 |
| C | 1.61148758  | -10.02534127 | -2.43319511 |
| C | 0.56601858  | -9.16551827  | -2.09336011 |
| H | 4.26218158  | -7.84903427  | -2.38306811 |
| H | 3.71934258  | -10.25849227 | -2.80366611 |
| H | 1.40345558  | -11.07430627 | -2.61981411 |
| H | -0.45777442 | -9.51492527  | -2.00785611 |
| C | 10.75838858 | -8.90829027  | 0.70468189  |
| C | 10.08094058 | -10.05159127 | 1.12636289  |
| C | 8.74386358  | -9.99005527  | 1.55148189  |
| C | 8.04499158  | -8.78383327  | 1.56871389  |
| H | 11.79117858 | -8.94493227  | 0.37385789  |
| H | 10.59293958 | -11.00865227 | 1.12793789  |
| H | 8.24839258  | -10.90083327 | 1.87263289  |
| H | 7.01221258  | -8.72656727  | 1.89670689  |

6

SCF energy in solution: -3250.54801

Free energy in solution: -3249.783845

|   |             |             |             |
|---|-------------|-------------|-------------|
| C | -0.16795866 | 0.50387596  | 0.00000000  |
| C | 2.00783034  | 0.64570396  | -0.09137900 |
| C | -1.77267666 | -1.05168004 | -0.69546300 |
| C | -1.65456666 | -3.04739604 | -1.79229000 |
| H | 0.05515434  | -1.91961604 | -1.35666500 |
| C | 0.08516634  | -4.32842404 | -2.65558500 |
| C | 2.27787034  | -4.17821904 | -2.74806200 |
| C | 5.20250934  | -2.23318304 | -1.90539000 |
| C | 5.19517934  | -0.98329604 | -1.09677300 |
| C | 3.92198334  | -2.70520404 | -1.96940600 |
| C | 3.71060634  | -0.74019704 | -0.84497000 |
| H | 2.03864534  | -1.92738704 | -1.28890200 |
| N | 3.53341334  | -3.81702604 | -2.63542700 |
| N | 3.34084134  | 0.38282196  | -0.33175900 |
| N | -1.41177166 | 0.07722096  | -0.12733400 |
| N | -1.19626366 | -4.12947804 | -2.43851700 |
| N | -0.95142066 | -2.00444004 | -1.29154800 |
| N | 1.14820234  | -3.55640804 | -2.29296500 |
| N | 3.04633734  | -1.83209004 | -1.27343500 |
| N | 0.98928034  | -0.14848304 | -0.40410900 |
| N | 6.79124234  | -3.57670304 | 1.48732100  |
| N | 5.89896034  | -1.02025304 | 0.15173500  |
| C | 10.82978034 | 1.96407096  | -3.00402800 |
| C | 11.56931734 | 0.81082796  | -2.47030700 |
| C | 9.52434034  | 0.57741296  | -1.74873100 |
| C | 13.56757834 | -0.36608104 | -2.28648300 |
| C | 14.17082434 | -2.30542404 | -1.24815500 |
| H | 12.19912734 | -1.54515904 | -1.19420600 |
| C | 13.00961934 | -5.13223004 | 0.77308600  |
| C | 11.69764034 | -5.30181204 | 1.22666300  |
| C | 13.00571734 | -3.87217004 | 0.02501000  |
| C | 10.96104734 | -4.13493604 | 0.73546800  |
| C | 7.57009134  | -2.72808704 | 0.78692800  |
| C | 7.21104134  | -1.53319204 | 0.18153800  |
| C | 8.98697534  | -2.92160104 | 0.55712700  |
| C | 8.38477134  | -0.99825304 | -0.43690600 |
| H | 10.36908734 | -1.72170304 | -0.50619100 |
| N | 9.66815434  | -3.96441304 | 0.97984200  |
| N | 8.42765334  | 0.12044696  | -1.16549400 |
| N | 12.86927534 | 0.65106896  | -2.73261800 |
| N | 14.12416434 | -3.41074004 | -0.55830100 |
| N | 13.14920634 | -1.42087704 | -1.52108500 |

|   |             |             |             |
|---|-------------|-------------|-------------|
| N | 11.78281434 | -3.30500804 | 0.02174700  |
| N | 9.42188034  | -1.84677804 | -0.17927500 |
| N | 10.76741634 | 0.01508496  | -1.73133100 |
| N | 6.33677934  | -2.65952504 | -2.63901900 |
| H | 6.03085334  | -3.25955104 | -3.40108100 |
| H | 6.99237434  | -3.19673904 | -2.07432600 |
| H | 7.16365134  | -4.48634704 | 1.71515000  |
| H | 5.78964334  | -3.47086004 | 1.40865200  |
| N | 5.70559734  | 0.22872496  | -1.92154100 |
| H | 6.74017834  | 0.34593296  | -1.76529800 |
| H | 5.51158434  | 0.08456496  | -2.91490500 |
| H | 5.18941434  | 1.04938896  | -1.57627700 |
| H | 5.68166434  | -0.24173404 | 0.76917700  |
| C | 15.36000034 | -1.76631604 | -1.89828000 |
| C | 16.66902434 | -2.23998204 | -1.95429500 |
| C | 17.59155834 | -1.48395304 | -2.66875200 |
| C | 17.21863434 | -0.28791904 | -3.31008100 |
| C | 15.91240334 | 0.18413496  | -3.25365700 |
| C | 14.98855934 | -0.57444004 | -2.53735200 |
| H | 16.94500534 | -3.16319804 | -1.45615300 |
| H | 18.62132334 | -1.81957704 | -2.73579900 |
| H | 17.96835234 | 0.27343196  | -3.85801700 |
| H | 15.61186734 | 1.10427696  | -3.74324800 |
| C | 9.52096734  | 1.81935696  | -2.53779700 |
| C | 8.54274234  | 2.76004196  | -2.83880400 |
| C | 8.91274234  | 3.84351096  | -3.63584400 |
| C | 10.22565134 | 3.98036396  | -4.11037300 |
| C | 11.20745434 | 3.04038696  | -3.79681800 |
| H | 7.53018534  | 2.67158096  | -2.45648800 |
| H | 8.17544934  | 4.59810196  | -3.89004600 |
| H | 10.47865334 | 4.83667996  | -4.72691700 |
| H | 12.22813934 | 3.13935996  | -4.15120400 |
| C | 12.32352634 | -7.34585604 | 2.26995800  |
| C | 13.64120334 | -7.17501704 | 1.81323400  |
| C | 14.00412134 | -6.06297804 | 1.05637800  |
| C | 11.33125934 | -6.41061504 | 1.98346700  |
| H | 12.07756534 | -8.22465004 | 2.85747100  |
| H | 14.38677834 | -7.92501604 | 2.05707600  |
| H | 15.01876834 | -5.92121704 | 0.69896200  |
| H | 10.31243334 | -6.53685504 | 2.33470800  |
| C | 0.17030034  | 1.78012896  | 0.60520000  |
| C | 1.57203134  | 1.87606496  | 0.54355600  |
| C | 2.24626334  | 2.99324196  | 1.04393600  |
| C | 1.48587934  | 4.01242296  | 1.60256400  |

|   |             |             |             |
|---|-------------|-------------|-------------|
| C | 0.07990834  | 3.91811696  | 1.66232900  |
| C | -0.59184766 | 2.80759696  | 1.16762500  |
| H | 3.32962434  | 3.05714196  | 0.99976900  |
| H | 1.97569334  | 4.89503196  | 2.00227800  |
| H | -0.48464166 | 4.73239896  | 2.10657300  |
| H | -1.67356566 | 2.73007596  | 1.21239200  |
| C | 0.62184034  | -7.57763704 | -4.59777400 |
| C | 2.01852934  | -7.48181704 | -4.66112500 |
| C | 2.69424234  | -6.40193404 | -4.08669900 |
| C | 1.92659134  | -5.43327004 | -3.45737400 |
| C | 0.54004534  | -5.52937904 | -3.39349900 |
| C | -0.14160266 | -6.59721704 | -3.95902300 |
| H | 0.12790634  | -8.43015604 | -5.05382900 |
| H | 2.58137934  | -8.26161004 | -5.16499400 |
| H | 3.77551434  | -6.31658304 | -4.12630800 |
| H | -1.22351866 | -6.65847704 | -3.90139500 |
| C | -5.48896166 | -1.76625004 | -0.71808800 |
| C | -5.41537266 | -3.00578004 | -1.39777500 |
| C | -4.19825866 | -3.52600504 | -1.79978200 |
| C | -3.04422666 | -2.78524304 | -1.51157700 |
| C | -3.11551166 | -1.54886604 | -0.83416500 |
| C | -4.35396966 | -1.02927304 | -0.42979500 |
| H | -6.46185266 | -1.38907104 | -0.41757500 |
| H | -6.33084366 | -3.55127204 | -1.60346300 |
| H | -4.12231766 | -4.47446404 | -2.32166600 |
| H | -4.40584766 | -0.07905904 | 0.09145000  |

TS7

SCF energy in solution: -3250.533605

Free energy in solution: -3249.768877

|   |             |             |             |
|---|-------------|-------------|-------------|
| C | -0.89147288 | -0.78811368 | 0.00000000  |
| C | -2.27856288 | -0.66829468 | -0.18047300 |
| C | -0.31902488 | 0.45989832  | -0.48484200 |
| C | -2.47484788 | 0.64820732  | -0.76695000 |
| C | 1.54947412  | 1.80610032  | -0.89901000 |
| C | 1.82219112  | 3.89061632  | -1.77697000 |
| H | -0.06901188 | 3.01231032  | -1.56109200 |
| C | 0.15014212  | 6.84076832  | -3.20633000 |
| C | -1.22847688 | 6.96749232  | -3.35732300 |
| C | 0.36699312  | 5.51262332  | -2.59463600 |
| C | -1.80718588 | 5.71055632  | -2.82966400 |
| C | -5.06373488 | 4.19346132  | -2.33236300 |
| C | -5.26601788 | 2.78896532  | -1.97177400 |

|   |              |            |             |
|---|--------------|------------|-------------|
| C | -3.69639788  | 4.41456432 | -2.36200000 |
| C | -3.89247088  | 2.28424832 | -1.59213000 |
| H | -2.01913688  | 3.23069232 | -1.75853600 |
| N | -3.11550088  | 5.53309232 | -2.82597300 |
| N | -3.72446788  | 1.10935332 | -1.09284800 |
| N | 0.98039312   | 0.69946532 | -0.47214400 |
| N | 1.58045512   | 5.08967632 | -2.32100800 |
| N | 0.93158812   | 2.92590432 | -1.43640700 |
| N | -0.82684788  | 4.87762232 | -2.39082800 |
| N | -3.01460988  | 3.26322632 | -1.93628200 |
| N | -1.32268688  | 1.29761732 | -0.93939900 |
| N | -6.89251288  | 5.14119032 | 0.03580200  |
| N | -6.28455788  | 2.34274032 | -1.16710800 |
| C | -12.24243188 | 0.43069532 | -2.58574700 |
| C | -10.10088088 | 0.71256132 | -2.25702800 |
| C | -15.62293088 | 1.88830932 | -2.29418700 |
| C | -15.87797988 | 3.16444232 | -1.77261700 |
| C | -14.18023288 | 1.67278132 | -2.24610800 |
| C | -14.59540688 | 3.75130432 | -1.39661500 |
| H | -12.64612288 | 2.94592732 | -1.55480900 |
| C | -13.11037188 | 6.77830532 | 0.03867000  |
| C | -11.74194688 | 6.96790432 | 0.25794300  |
| C | -13.23271088 | 5.43681032 | -0.53902600 |
| C | -11.09808388 | 5.73283332 | -0.19614100 |
| C | -7.75974688  | 4.24415132 | -0.49315500 |
| C | -7.51816588  | 2.99170832 | -1.03977400 |
| C | -9.18940188  | 4.45672732 | -0.54900400 |
| C | -8.77551888  | 2.42249132 | -1.40330600 |
| H | -10.73962088 | 3.18281532 | -1.21616600 |
| N | -9.78565288  | 5.55905232 | -0.13999400 |
| N | -8.92398288  | 1.21421832 | -1.93759000 |
| N | -13.57219288 | 0.58633132 | -2.65138700 |
| N | -14.43430688 | 4.93462532 | -0.87456500 |
| N | -13.63757088 | 2.81006132 | -1.70708800 |
| N | -12.03099688 | 4.84424932 | -0.66477000 |
| N | -9.74955888  | 3.32514432 | -1.08328900 |
| N | -11.33145688 | 1.30451032 | -2.12060100 |
| N | -6.00966288  | 4.91354132 | -3.11350400 |
| H | -5.51813888  | 5.64774532 | -3.61921200 |
| H | -6.73449788  | 5.35830032 | -2.55457500 |
| H | -7.25620988  | 6.05161832 | 0.27698700  |
| H | -5.90728588  | 5.05485432 | -0.17964700 |
| N | -5.47176088  | 2.06077632 | -3.59396700 |
| H | -5.66802888  | 1.06138632 | -3.60082400 |



|   |              |             |             |
|---|--------------|-------------|-------------|
| H | -6.21455588  | 2.60965432  | -4.03232200 |
| H | -4.57495788  | 2.28054732  | -4.02414900 |
| H | -6.17351588  | 1.40939632  | -0.78518900 |
| C | -1.79800288  | 8.10753432  | -3.90610700 |
| C | -0.93131288  | 9.12749332  | -4.30602900 |
| C | 0.45636612   | 8.99899932  | -4.15519200 |
| C | 1.01992412   | 7.84789032  | -3.59987300 |
| H | -2.87408588  | 8.19629932  | -4.01569000 |
| H | -1.33560988  | 10.03651132 | -4.74042800 |
| H | 1.10148512   | 9.81098232  | -4.47613900 |
| H | 2.09222312   | 7.73624032  | -3.47632200 |
| C | 4.40313112   | 3.95489632  | -1.58161600 |
| C | 3.13065212   | 3.38439332  | -1.44500200 |
| C | 2.96061512   | 2.09385932  | -0.90037200 |
| C | 4.06814312   | 1.34475132  | -0.47920700 |
| C | 5.32170212   | 1.91448132  | -0.61714600 |
| C | 5.49067012   | 3.20889832  | -1.16370800 |
| H | 4.51519712   | 4.94882332  | -2.00230600 |
| H | 3.93257812   | 0.35302432  | -0.06060500 |
| H | 6.19932012   | 1.35963432  | -0.29986400 |
| H | 6.49205812   | 3.61753532  | -1.25362200 |
| C | -1.20555888  | -2.96897268 | 0.91126900  |
| C | -2.59781588  | -2.84731368 | 0.73102500  |
| C | -3.15081688  | -1.69590068 | 0.18345800  |
| C | -0.33737888  | -1.94533868 | 0.55004800  |
| H | -0.80742688  | -3.88230468 | 1.34276400  |
| H | -3.24429088  | -3.66726468 | 1.02800300  |
| H | -4.22274388  | -1.59307468 | 0.04465700  |
| H | 0.73560512   | -2.03295368 | 0.68775300  |
| C | -14.04200588 | 7.76128332  | 0.35827400  |
| C | -13.55825588 | 8.94652632  | 0.90772600  |
| C | -12.18384888 | 9.13765032  | 1.12914500  |
| C | -11.25507088 | 8.15031932  | 0.80731000  |
| H | -15.10117788 | 7.60261432  | 0.18377700  |
| H | -14.25181788 | 9.73851332  | 1.17169800  |
| H | -11.84301788 | 10.07371232 | 1.56014300  |
| H | -10.19284688 | 8.29195632  | 0.97786800  |
| C | -16.65529588 | 1.06869632  | -2.74530600 |
| C | -17.95052788 | 1.56646132  | -2.65804400 |
| C | -18.20680388 | 2.84716632  | -2.13435200 |
| C | -17.17536488 | 3.66401232  | -1.68428500 |
| H | -16.44354988 | 0.08325432  | -3.14636400 |
| H | -18.78246288 | 0.95888932  | -2.99905600 |
| H | -19.23142588 | 3.20084132  | -2.08216500 |

|   |              |             |             |
|---|--------------|-------------|-------------|
| H | -17.36039788 | 4.65280832  | -1.27834500 |
| C | -12.11090788 | -1.98238068 | -3.60225500 |
| C | -11.60584388 | -0.80934468 | -3.05463200 |
| C | -10.23705788 | -0.62992068 | -2.84268300 |
| C | -9.31919888  | -1.62229068 | -3.16532700 |
| C | -9.81849988  | -2.80309068 | -3.71536000 |
| C | -11.19372088 | -2.98025568 | -3.93208800 |
| H | -13.17664788 | -2.10964668 | -3.76154200 |
| H | -8.25785588  | -1.48259568 | -2.98654400 |
| H | -9.13393788  | -3.60314368 | -3.97875800 |
| H | -11.54605588 | -3.91282668 | -4.36104800 |

8

SCF energy in solution: -3250.580725

Free energy in solution: -3249.834828

|   |             |            |            |
|---|-------------|------------|------------|
| C | 0.14211887  | 1.95090436 | 0.00000000 |
| C | 1.52561787  | 2.07429236 | 0.15476100 |
| C | -0.43428213 | 3.11759136 | 0.67942300 |
| C | 1.72714087  | 3.30175736 | 0.93578400 |
| C | -2.31456313 | 4.35137836 | 1.28054500 |
| C | -2.61729513 | 6.32330436 | 2.38892000 |
| H | -0.70732313 | 5.49210836 | 2.04110400 |
| C | -0.95795413 | 9.12576836 | 4.07020800 |
| C | 0.42491187  | 9.24445236 | 4.23776000 |
| C | -1.15955213 | 7.86075436 | 3.35519100 |
| C | 0.99940487  | 8.04577936 | 3.61769200 |
| C | 4.26823487  | 6.49179336 | 3.05318500 |
| C | 4.46513187  | 5.29195136 | 2.38082900 |
| C | 2.85143787  | 6.76026636 | 3.04559600 |
| C | 3.16703287  | 4.81215436 | 1.97180000 |
| H | 1.23824987  | 5.62561136 | 2.27519400 |
| N | 2.30702687  | 7.82822636 | 3.59645800 |
| N | 2.94030387  | 3.70146836 | 1.28856400 |
| N | -1.75858813 | 3.31199736 | 0.71057500 |
| N | -2.39013713 | 7.43819136 | 3.03345300 |
| N | -1.70908213 | 5.40253036 | 1.92319300 |
| N | 0.01551987  | 7.24802236 | 3.10247700 |
| N | 2.23443987  | 5.71650636 | 2.40781300 |
| N | 0.52805087  | 3.89507036 | 1.21844400 |
| N | 6.08173487  | 7.29808336 | 0.50446700 |
| N | 5.65707787  | 4.63656436 | 2.13478600 |
| C | 11.73737787 | 3.09810036 | 3.39954900 |
| C | 9.57197687  | 3.29172736 | 3.18800400 |

|   |             |             |             |
|---|-------------|-------------|-------------|
| C | 15.03636587 | 4.60855736  | 2.71357400  |
| C | 15.20864687 | 5.82943436  | 2.04318400  |
| C | 13.60577787 | 4.34634536  | 2.78850800  |
| C | 13.88598887 | 6.33190536  | 1.69786700  |
| H | 11.98426287 | 5.49089236  | 2.06718600  |
| C | 12.20058487 | 9.14707036  | 0.05991200  |
| C | 10.81506587 | 9.26749236  | -0.08260800 |
| C | 12.41424387 | 7.87874736  | 0.76658300  |
| C | 10.24987187 | 8.06701736  | 0.54375000  |
| C | 6.99205887  | 6.51776136  | 1.18093600  |
| C | 6.81682887  | 5.32010736  | 1.86178200  |
| C | 8.40835187  | 6.78408036  | 1.14944800  |
| C | 8.12789587  | 4.83733036  | 2.22888700  |
| H | 10.04693087 | 5.65596736  | 1.87373500  |
| N | 8.94094687  | 7.85339036  | 0.58885400  |
| N | 8.35215587  | 3.71487636  | 2.88204700  |
| N | 13.05982087 | 3.29676836  | 3.35049100  |
| N | 13.64749187 | 7.45387436  | 1.06558300  |
| N | 12.98804887 | 5.40479636  | 2.16747400  |
| N | 11.24104187 | 7.26703236  | 1.03734500  |
| N | 9.04751287  | 5.74264036  | 1.76951700  |
| N | 10.76462287 | 3.89148936  | 2.90010800  |
| N | 5.16312887  | 7.27568736  | 3.73244100  |
| H | 4.82305587  | 8.19705436  | 3.97384400  |
| H | 6.13528287  | 7.22374436  | 3.46068600  |
| H | 6.43386587  | 8.21385836  | 0.25590100  |
| H | 5.12702587  | 7.28787636  | 0.83706500  |
| N | 5.12737187  | 1.82270736  | 2.56811400  |
| H | 5.72181087  | 1.13719836  | 2.11327100  |
| H | 4.89665887  | 1.47112236  | 3.49162200  |
| H | 4.26406387  | 1.91114236  | 2.03587700  |
| H | 5.69779487  | 3.62287436  | 2.33245900  |
| C | 0.98348187  | 10.34017036 | 4.88824300  |
| C | 0.11026987  | 11.31617536 | 5.36465500  |
| C | -1.27917513 | 11.19664536 | 5.19490700  |
| C | -1.83434513 | 10.09660036 | 4.54402700  |
| H | 2.05748387  | 10.42506636 | 5.01794900  |
| H | 0.50744187  | 12.18620336 | 5.87800900  |
| H | -1.92825413 | 11.97682236 | 5.57979800  |
| H | -2.90598413 | 9.99334736  | 4.40823800  |
| C | -5.20925413 | 6.34179936  | 2.23367900  |
| C | -3.93417413 | 5.82067736  | 2.01820700  |
| C | -3.74803613 | 4.60843536  | 1.33702500  |
| C | -4.83068413 | 3.87792036  | 0.84898100  |

|   |             |             |             |
|---|-------------|-------------|-------------|
| C | -6.10158313 | 4.39688436  | 1.06406200  |
| C | -6.28843313 | 5.61363336  | 1.74788800  |
| H | -5.33974813 | 7.28045736  | 2.76162800  |
| H | -4.67311113 | 2.94205136  | 0.32347700  |
| H | -6.96972813 | 3.85732136  | 0.69950200  |
| H | -7.29679013 | 5.98644436  | 1.89617700  |
| C | 0.45240387  | -0.05495664 | -1.23992900 |
| C | 1.84330187  | 0.07296436  | -1.09321200 |
| C | 2.40082787  | 1.14288536  | -0.39484500 |
| C | -0.42007313 | 0.88693436  | -0.69706900 |
| H | 0.05418987  | -0.90044564 | -1.79182700 |
| H | 2.49339787  | -0.67354164 | -1.53845600 |
| H | 3.47609287  | 1.25689136  | -0.29627000 |
| H | -1.49583713 | 0.80262836  | -0.81156900 |
| C | 13.06883387 | 10.11913636 | -0.42596800 |
| C | 12.50300387 | 11.22200136 | -1.06301400 |
| C | 11.11093387 | 11.34312036 | -1.20766800 |
| C | 10.24579087 | 10.36581436 | -0.71908000 |
| H | 14.14265087 | 10.01452136 | -0.30969600 |
| H | 13.14583187 | 12.00304436 | -1.45664600 |
| H | 10.70527487 | 12.21515336 | -1.71095500 |
| H | 9.16964587  | 10.45138036 | -0.82929300 |
| C | 16.12957587 | 3.87622136  | 3.17631100  |
| C | 17.39500687 | 4.40148736  | 2.94771100  |
| C | 17.56788287 | 5.62689736  | 2.27463000  |
| C | 16.47946487 | 6.35665136  | 1.81396100  |
| H | 15.98297487 | 2.93385036  | 3.69335300  |
| H | 18.27036687 | 3.86056536  | 3.29262300  |
| H | 18.57279987 | 6.00439836  | 2.11505300  |
| H | 16.59887287 | 7.30149536  | 1.29442900  |
| C | 11.74042587 | 0.82196036  | 4.70340800  |
| C | 11.17111887 | 1.91152536  | 4.05207500  |
| C | 9.78544987  | 2.03881236  | 3.91949600  |
| C | 8.91566487  | 1.08374636  | 4.43540800  |
| C | 9.48060787  | -0.01000064 | 5.08866600  |
| C | 10.87361287 | -0.13950564 | 5.21990300  |
| H | 12.81736487 | 0.73210936  | 4.80186200  |
| H | 7.84136287  | 1.20100736  | 4.33269000  |
| H | 8.83693087  | -0.77717464 | 5.50773900  |
| H | 11.27801387 | -1.00472964 | 5.73571200  |

9s

SCF energy in solution: -3194.017272

Free energy in solution: -3193.294444

|   |             |             |             |
|---|-------------|-------------|-------------|
| C | 0.24486268  | 1.79456514  | -0.07050403 |
| C | 1.63326968  | 1.74949314  | -0.21746503 |
| C | -0.26415032 | 0.61615214  | -0.78550603 |
| C | 1.90751168  | 0.54720414  | -1.01670203 |
| C | -3.61175632 | -2.18570186 | -2.29926703 |
| C | -2.07293132 | -0.68241786 | -1.46349303 |
| C | -2.26870232 | -2.60436586 | -2.67920203 |
| H | -0.40420632 | -1.70350786 | -2.25473103 |
| C | -0.46078432 | -5.21454586 | -4.51077603 |
| C | 0.92926968  | -5.26391986 | -4.65785703 |
| C | -0.72845532 | -4.01457386 | -3.71253103 |
| C | 1.44079568  | -4.09267286 | -3.94114803 |
| C | 4.63126768  | -2.45711786 | -3.17109003 |
| C | 4.74732368  | -1.28313986 | -2.44221603 |
| C | 3.22274068  | -2.78216386 | -3.22851103 |
| C | 3.42490168  | -0.87824186 | -2.05296503 |
| H | 1.54178968  | -1.75198586 | -2.46133703 |
| N | 2.73977568  | -3.82493086 | -3.87054003 |
| N | 3.14223568  | 0.20492814  | -1.34580803 |
| N | -1.57583832 | 0.35750514  | -0.83935303 |
| N | -1.98076432 | -3.66573486 | -3.38523303 |
| N | -1.41056832 | -1.66776686 | -2.14931903 |
| N | 0.41616168  | -3.37462786 | -3.39225103 |
| N | 2.54546768  | -1.80221186 | -2.55221103 |
| N | 0.74216968  | -0.09797486 | -1.33128503 |
| N | 6.28444968  | -3.23203186 | -0.49279803 |
| N | 5.90971168  | -0.60179486 | -2.08814303 |
| C | 11.98843868 | 0.65700614  | -3.70676803 |
| C | 9.83004968  | 0.56969914  | -3.38368503 |
| C | 15.26179168 | -0.93375686 | -3.07672703 |
| C | 15.42451568 | -2.11096786 | -2.33146403 |
| C | 13.83768368 | -0.62340686 | -3.10417403 |
| C | 14.10247768 | -2.53984486 | -1.89144803 |
| H | 12.21410968 | -1.65641586 | -2.23550303 |
| C | 12.40418968 | -5.16081186 | 0.02889497  |
| C | 11.02285868 | -5.22397886 | 0.23649097  |
| C | 12.62400968 | -3.96148586 | -0.78684003 |
| C | 10.46683668 | -4.06127886 | -0.46338403 |
| C | 7.23572368  | -2.45799786 | -1.10371903 |
| C | 7.08165968  | -1.28960886 | -1.83286203 |
| C | 8.64253568  | -2.77125486 | -1.10308603 |
| C | 8.38372468  | -0.87461086 | -2.27591003 |
| H | 10.28779668 | -1.73974386 | -1.94600503 |

|   |             |             |             |
|---|-------------|-------------|-------------|
| N | 9.16543768  | -3.80870586 | -0.47756303 |
| N | 8.61549468  | 0.20942914  | -2.99791303 |
| N | 13.30496668 | 0.40855014  | -3.70797203 |
| N | 13.85783568 | -3.60196486 | -1.16953303 |
| N | 13.21432068 | -1.61361986 | -2.38567603 |
| N | 11.46154568 | -3.33567286 | -1.06030903 |
| N | 9.28962568  | -1.79238286 | -1.81314303 |
| N | 11.01331868 | -0.06478086 | -3.11843703 |
| N | 5.58769668  | -3.23516786 | -3.74655703 |
| H | 5.25176168  | -3.95642386 | -4.36886703 |
| H | 6.47996268  | -2.81993686 | -3.96531203 |
| H | 6.65697568  | -3.92509086 | 0.14270997  |
| H | 5.45778068  | -2.75238186 | -0.16467303 |
| H | 5.99675268  | 0.37325514  | -2.34297503 |
| C | 11.43946968 | 1.82903914  | -4.40004203 |
| C | 10.05814168 | 1.77242214  | -4.19417003 |
| C | 9.20761368  | 2.73954214  | -4.71922403 |
| C | 9.78776768  | 3.76906714  | -5.45876403 |
| C | 11.17587868 | 3.82561314  | -5.66480403 |
| C | 12.02395068 | 2.85336314  | -5.13686403 |
| H | 8.13591968  | 2.68843614  | -4.55660403 |
| H | 9.15777568  | 4.54332714  | -5.88521603 |
| H | 11.59164268 | 4.64248414  | -6.24617903 |
| H | 13.09773968 | 2.88687314  | -5.28974103 |
| C | 17.77501968 | -2.01102386 | -2.68281203 |
| C | 16.68562468 | -2.66763286 | -2.12329703 |
| C | 16.35453968 | -0.27463486 | -3.63809303 |
| C | 17.61164668 | -0.82928986 | -3.43086803 |
| H | 18.77314068 | -2.41338786 | -2.54266603 |
| H | 16.79801368 | -3.57847586 | -1.54487003 |
| H | 16.21485068 | 0.63521914  | -4.21211703 |
| H | 18.48710868 | -0.34558686 | -3.85199603 |
| C | 12.69339868 | -7.14933786 | 1.30149197  |
| C | 11.30546168 | -7.21417886 | 1.50944097  |
| C | 10.44908568 | -6.25138986 | 0.97880097  |
| C | 13.26364968 | -6.11935986 | 0.55601997  |
| H | 13.32914168 | -7.91753086 | 1.73025797  |
| H | 10.89611168 | -8.03163886 | 2.09466097  |
| H | 9.37600268  | -6.29630786 | 1.13372397  |
| H | 14.33409268 | -6.05980186 | 0.38826197  |
| C | -0.37870432 | 2.81403814  | 0.63982797  |
| C | 0.43919368  | 3.79346614  | 1.20220297  |
| C | 1.83486968  | 3.74784114  | 1.05523297  |
| C | 2.45423268  | 2.72214114  | 0.34173397  |

|   |             |             |             |
|---|-------------|-------------|-------------|
| H | -1.45817632 | 2.83897614  | 0.74766997  |
| H | -0.00724732 | 4.60729814  | 1.76481197  |
| H | 2.44000368  | 4.52716514  | 1.50769297  |
| H | 3.53206068  | 2.67658314  | 0.22408297  |
| C | -3.49136632 | -1.00445186 | -1.55179203 |
| C | -4.85860032 | -2.75310586 | -2.55958603 |
| C | -5.97616532 | -2.10345686 | -2.05021403 |
| C | -5.85512132 | -0.91766186 | -1.30007703 |
| C | -4.61283632 | -0.35221986 | -1.04074103 |
| H | -4.93891132 | -3.66680886 | -3.13884803 |
| H | -6.96403232 | -2.51455586 | -2.23179903 |
| H | -6.75195032 | -0.43980286 | -0.91921603 |
| H | -4.50523832 | 0.56067814  | -0.46461503 |
| C | 0.72339368  | -7.26370286 | -5.93118703 |
| C | -0.67328732 | -7.21282486 | -5.78382503 |
| C | -1.28612132 | -6.18561486 | -5.06979203 |
| C | 1.54535868  | -6.28933986 | -5.36935303 |
| H | 1.16630768  | -8.07971886 | -6.49353203 |
| H | -1.28154432 | -7.99014186 | -6.23545103 |
| H | -2.36343832 | -6.13704386 | -4.94895503 |
| H | 2.62455268  | -6.32377686 | -5.47760303 |

9t

SCF energy in solution: -3194.01032097

Free energy in solution: -3193.26129709

|   |             |             |             |
|---|-------------|-------------|-------------|
| C | 0.70769229  | 1.26153844  | 0.00000000  |
| C | 2.09536729  | 1.07907644  | -0.12154500 |
| C | 0.10860829  | 0.08206344  | -0.59994800 |
| C | 2.26123229  | -0.20037156 | -0.79035300 |
| C | -3.47311571 | -2.56089956 | -1.89586600 |
| C | -1.80342871 | -1.11584256 | -1.18047600 |
| C | -2.15510371 | -3.13528056 | -2.22441100 |
| H | -0.21970171 | -2.35388656 | -1.85825500 |
| C | -0.56541071 | -6.03724756 | -3.77469700 |
| C | 0.82304529  | -6.20838356 | -3.90613400 |
| C | -0.73713971 | -4.75774356 | -3.10738200 |
| C | 1.41508129  | -5.02314656 | -3.31058900 |
| C | 4.76274629  | -3.57631956 | -2.67178600 |
| C | 4.96961329  | -2.39771756 | -2.01739700 |
| C | 3.29791129  | -3.79783156 | -2.72278600 |
| C | 3.66314229  | -1.83068756 | -1.67324100 |
| H | 1.70648429  | -2.57083656 | -2.04822600 |
| N | 2.76940929  | -4.84650756 | -3.25828900 |

|   |             |             |             |
|---|-------------|-------------|-------------|
| N | 3.50113729  | -0.69793556 | -1.07204600 |
| N | -1.24461671 | -0.07906656 | -0.65416200 |
| N | -1.97635471 | -4.26744256 | -2.81905600 |
| N | -1.21788171 | -2.22514956 | -1.77019400 |
| N | 0.46208629  | -4.17858856 | -2.84399400 |
| N | 2.70144329  | -2.71341056 | -2.13073600 |
| N | 1.06020629  | -0.76991156 | -1.06177000 |
| N | 6.72071229  | -4.49123756 | -0.32483200 |
| N | 6.14297729  | -1.73768756 | -1.68225700 |
| C | 12.06543029 | 0.12543844  | -3.19690600 |
| C | 9.92451329  | -0.16429556 | -2.88095500 |
| C | 15.46160429 | -1.25694256 | -2.74062800 |
| C | 15.72390929 | -2.48431056 | -2.11516500 |
| C | 14.01671429 | -1.05661756 | -2.72953800 |
| C | 14.44374629 | -3.05533756 | -1.71094200 |
| H | 12.48910029 | -2.29114856 | -1.95323700 |
| C | 12.98011029 | -5.97234256 | -0.04154800 |
| C | 11.61118129 | -6.16548956 | 0.16571500  |
| C | 13.09391529 | -4.68826156 | -0.74350400 |
| C | 10.95531129 | -4.99157256 | -0.42212300 |
| C | 7.60652229  | -3.59156356 | -0.88965900 |
| C | 7.34843329  | -2.38152456 | -1.51585700 |
| C | 9.02877429  | -3.79526856 | -0.93471800 |
| C | 8.61160629  | -1.82540656 | -1.92500800 |
| H | 10.57636129 | -2.57689056 | -1.70872900 |
| N | 9.64064229  | -4.84325256 | -0.40812700 |
| N | 8.74784529  | -0.65862756 | -2.53101500 |
| N | 13.39912329 | -0.01701756 | -3.22599900 |
| N | 14.29266529 | -4.19791456 | -1.09447800 |
| N | 13.48082629 | -2.15814156 | -2.10649800 |
| N | 11.88429529 | -4.13568456 | -0.95372600 |
| N | 9.58797129  | -2.71117256 | -1.55943600 |
| N | 11.15767329 | -0.72789056 | -2.68494400 |
| N | 5.60003929  | -4.44158456 | -3.31280500 |
| H | 5.17039029  | -5.33581856 | -3.51897600 |
| H | 6.54813529  | -4.50151656 | -2.96538500 |
| H | 7.18579029  | -5.18647456 | 0.24705300  |
| H | 5.92231229  | -4.07083056 | 0.13392400  |
| H | 6.17216329  | -0.73613756 | -1.82980600 |
| C | 11.42002829 | 1.31571244  | -3.76400600 |
| C | 10.04945029 | 1.12959244  | -3.56198000 |
| C | 9.12014829  | 2.07493844  | -3.98276500 |
| C | 9.61057429  | 3.21769244  | -4.61279400 |
| C | 10.98783229 | 3.40472044  | -4.81469900 |



|   |             |             |             |
|---|-------------|-------------|-------------|
| C | 11.91502029 | 2.45338444  | -4.39218400 |
| H | 8.05734129  | 1.92221844  | -3.82572100 |
| H | 8.91745629  | 3.97915544  | -4.95621000 |
| H | 11.33220829 | 4.30721044  | -5.30967500 |
| H | 12.98115629 | 2.58705044  | -4.54379400 |
| C | 18.05470529 | -2.16926556 | -2.46839900 |
| C | 17.02582129 | -2.95969756 | -1.96954300 |
| C | 16.49256629 | -0.46384656 | -3.24112900 |
| C | 17.79141629 | -0.93711956 | -3.09602900 |
| H | 19.08238629 | -2.50498956 | -2.37412700 |
| H | 17.21509929 | -3.91106956 | -1.48386700 |
| H | 16.27602529 | 0.48375944  | -3.72274600 |
| H | 18.62152029 | -0.34823756 | -3.47270300 |
| C | 13.44361229 | -8.03841756 | 1.04115500  |
| C | 12.06833629 | -8.23377056 | 1.24922600  |
| C | 11.13080629 | -7.29885756 | 0.81345800  |
| C | 13.92025929 | -6.90162156 | 0.39073700  |
| H | 14.14409429 | -8.78855256 | 1.39425900  |
| H | 11.73302729 | -9.13136456 | 1.75926800  |
| H | 10.06689529 | -7.44427656 | 0.96996600  |
| H | 14.98028129 | -6.74026656 | 0.22397800  |
| C | 0.17867929  | 2.40075444  | 0.60240800  |
| C | 1.07795029  | 3.35220844  | 1.07993500  |
| C | 2.46685329  | 3.16869044  | 0.95935400  |
| C | 2.99519229  | 2.02843644  | 0.35692100  |
| H | -0.89445271 | 2.53487144  | 0.69266300  |
| H | 0.70299329  | 4.25319044  | 1.55517400  |
| H | 3.13662829  | 3.93106644  | 1.34447000  |
| H | 4.06581229  | 1.87797244  | 0.26199000  |
| C | -3.25922571 | -1.33423356 | -1.26197800 |
| C | -4.75174171 | -3.04695756 | -2.12114900 |
| C | -5.82295571 | -2.26092456 | -1.68802600 |
| C | -5.60875871 | -1.03201956 | -1.05286000 |
| C | -4.31666271 | -0.54866256 | -0.82981000 |
| H | -4.90175671 | -4.00120056 | -2.61506000 |
| H | -6.83923871 | -2.60717156 | -1.84595200 |
| H | -6.46268271 | -0.44592156 | -0.72881300 |
| H | -4.13529671 | 0.40187044  | -0.33930400 |
| C | 0.46252929  | -8.30320856 | -4.98194600 |
| C | -0.92660371 | -8.13203856 | -4.84949900 |
| C | -1.46008271 | -6.99565856 | -4.24403700 |
| C | 1.35695729  | -7.34321456 | -4.51223200 |
| H | 0.84180329  | -9.20067856 | -5.46027400 |
| H | -1.59265471 | -8.90102756 | -5.22783400 |

|   |             |             |             |
|---|-------------|-------------|-------------|
| H | -2.53101871 | -6.85516756 | -4.13880500 |
| H | 2.43010229  | -7.46904956 | -4.61343000 |

10s

SCF energy in solution: -3344.283169

Free energy in solution: -3343.554448

|   |              |             |             |
|---|--------------|-------------|-------------|
| C | 1.53733598   | -0.19379845 | 0.02012475  |
| C | 3.25386398   | -1.11972445 | -1.16793325 |
| C | 1.29345498   | -1.60000445 | -0.33665925 |
| C | 6.28437498   | -3.64999145 | -3.56518025 |
| C | 4.88927998   | -2.24480645 | -2.38004525 |
| C | 5.06642098   | -4.36528445 | -3.20504825 |
| H | 3.37847898   | -3.69368445 | -2.12173825 |
| C | 3.66417398   | -6.22741145 | -3.16495025 |
| C | 1.69375298   | -6.71054245 | -2.36330425 |
| C | -1.18259902  | -5.47096345 | -0.44801225 |
| C | -1.25340702  | -4.19013345 | 0.09729075  |
| C | 0.08363198   | -5.56314045 | -1.14645225 |
| C | -0.08275502  | -3.48285445 | -0.30089925 |
| H | 1.62620598   | -4.13251745 | -1.37039025 |
| N | 0.51198798   | -6.64277445 | -1.75870325 |
| N | 0.17636298   | -2.21494045 | 0.01010575  |
| N | 4.43962398   | -1.16600845 | -1.78347125 |
| N | 4.80254598   | -5.60610745 | -3.51046025 |
| N | 4.28893098   | -3.46894545 | -2.50346225 |
| N | 2.62764698   | -5.71828145 | -2.46736025 |
| N | 0.71566298   | -4.35291845 | -0.99317325 |
| N | 2.34632998   | -2.10950945 | -1.04425325 |
| N | -2.65777102  | -0.82211545 | -0.18488925 |
| N | -2.30887802  | -3.69604345 | 0.88520875  |
| C | -7.89031802  | -6.27142645 | -1.09490125 |
| C | -5.93657102  | -5.76864745 | -0.25845025 |
| C | -10.85066502 | -5.05967945 | -2.93533525 |
| C | -10.99275702 | -3.74484545 | -3.40287025 |
| C | -9.55818302  | -5.15156245 | -2.26722925 |
| C | -9.78894502  | -3.01253845 | -3.02883325 |
| H | -8.07715402  | -3.67645845 | -1.97966325 |
| C | -8.21456602  | 0.28730855  | -3.27759725 |
| C | -6.95690902  | 0.60968855  | -2.75694425 |
| C | -8.43052602  | -1.12098945 | -2.93579225 |
| C | -6.47042302  | -0.61663545 | -2.12108625 |
| C | -3.53358802  | -1.85499645 | -0.29853725 |
| C | -3.40574902  | -3.14665145 | 0.18137675  |

|   |             |              |             |
|---|-------------|--------------|-------------|
| C | -4.83258002 | -1.76035645  | -0.93288025 |
| C | -4.59621802 | -3.85984445  | -0.16327925 |
| H | -6.32944402 | -3.23083345  | -1.20093725 |
| N | -5.28907602 | -0.67372945  | -1.51689825 |
| N | -4.82813402 | -5.14464645  | 0.09648175  |
| N | -9.08022002 | -6.23565745  | -1.70471625 |
| N | -9.55553702 | -1.75720145  | -3.29815825 |
| N | -8.98668002 | -3.91033745  | -2.35851925 |
| N | -7.38339502 | -1.62595445  | -2.25159125 |
| N | -5.42536102 | -2.99193145  | -0.82142325 |
| N | -7.00777902 | -5.26343945  | -0.94405425 |
| N | -2.07970402 | -6.46246145  | -0.34801225 |
| H | -3.01055002 | -6.23980945  | -0.00378925 |
| H | -1.92236902 | -7.30691745  | -0.87682125 |
| H | -1.67678802 | -1.07012545  | -0.07320625 |
| H | -2.86126502 | -0.01236945  | -0.75485925 |
| H | -1.97183402 | -3.08003345  | 1.61912175  |
| O | 1.52340098  | -5.14728645  | 1.45411675  |
| O | 0.39357698  | -5.31666045  | 1.85436975  |
| C | 2.33212998  | -10.13171045 | -3.91493625 |
| C | 3.60242898  | -9.82087445  | -4.43009325 |
| C | 4.16390598  | -8.55872245  | -4.25167425 |
| C | 3.41745698  | -7.62074045  | -3.54430825 |
| C | 2.15306098  | -7.92949045  | -3.03140625 |
| C | 1.58888498  | -9.18990945  | -3.20745525 |
| H | 1.92637698  | -11.12599945 | -4.07318525 |
| H | 4.15243598  | -10.58101845 | -4.97586225 |
| H | 5.14385698  | -8.30845345  | -4.64486725 |
| H | 0.60816998  | -9.42336745  | -2.80597125 |
| C | 7.41406498  | -4.05874245  | -4.27223625 |
| C | 8.42684298  | -3.12485545  | -4.45517725 |
| C | 8.31688298  | -1.81626345  | -3.94705825 |
| C | 7.19060198  | -1.40890745  | -3.24256325 |
| C | 6.17506498  | -2.34631445  | -3.05904525 |
| H | 7.48729898  | -5.06965145  | -4.65885125 |
| H | 9.32234398  | -3.40585545  | -5.00009625 |
| H | 9.12953798  | -1.11596445  | -4.11082125 |
| H | 7.09263098  | -0.40413845  | -2.84549725 |
| C | 1.35884498  | 2.01868155   | 0.87603275  |
| C | 0.80058798  | 0.74849655   | 0.72885975  |
| C | 2.79028998  | 0.11410855   | -0.51471325 |
| C | 3.35310398  | 1.37614355   | -0.36997925 |
| C | 2.61548498  | 2.32843255   | 0.33374175  |
| H | 0.81524898  | 2.78204355   | 1.42362475  |

|   |              |              |             |
|---|--------------|--------------|-------------|
| H | -0.16553702  | 0.50341655   | 1.16035675  |
| H | 4.32804798   | 1.60268955   | -0.78898125 |
| H | 3.01895198   | 3.32675955   | 0.46982375  |
| C | -6.42092802  | 1.88654155   | -2.89883625 |
| C | -7.18530802  | 2.83043155   | -3.58072925 |
| C | -8.44864602  | 2.50563955   | -4.10412225 |
| C | -8.98201002  | 1.22704055   | -3.95960025 |
| H | -5.44526202  | 2.13084655   | -2.49151325 |
| H | -6.80156402  | 3.83724355   | -3.71241325 |
| H | -9.01542102  | 3.26777055   | -4.62955025 |
| H | -9.95632002  | 0.96566955   | -4.35951525 |
| C | -12.98600202 | -5.61226445  | -3.82508025 |
| C | -11.84605102 | -6.01411345  | -3.13946125 |
| C | -12.13612602 | -3.34149045  | -4.09067825 |
| C | -13.12882502 | -4.29253845  | -4.29449825 |
| H | -13.78377102 | -6.32582345  | -4.00404625 |
| H | -11.72284802 | -7.02740045  | -2.77216125 |
| H | -12.23476702 | -2.32180345  | -4.44747225 |
| H | -14.03399802 | -4.01642045  | -4.82574725 |
| C | -7.16491602  | -9.74470945  | 0.30490775  |
| C | -5.91571302  | -9.41945845  | 0.85548175  |
| C | -5.38829302  | -8.13268645  | 0.74300475  |
| C | -6.14769802  | -7.18979645  | 0.05923875  |
| C | -7.39443802  | -7.51247045  | -0.48104825 |
| C | -7.92665802  | -8.79134445  | -0.37088025 |
| H | -7.54403202  | -10.75582945 | 0.41381575  |
| H | -5.35409202  | -10.18367945 | 1.38331375  |
| H | -4.43071102  | -7.87444445  | 1.18564875  |
| H | -8.89690102  | -9.02954745  | -0.79430925 |

10t

SCF energy in solution: -3344.337303

Free energy in solution: -3343.608762

|   |             |             |             |
|---|-------------|-------------|-------------|
| C | -1.66666669 | -0.94315244 | 0.00000000  |
| C | 0.04029631  | -1.87669044 | -1.19589600 |
| C | -1.91201369 | -2.35276344 | -0.34181500 |
| C | 3.03933231  | -4.42594144 | -3.61206800 |
| C | 1.66265931  | -3.01316244 | -2.41605200 |
| C | 1.82883231  | -5.13860844 | -3.22896200 |
| H | 0.15828731  | -4.46207344 | -2.12265700 |
| C | 0.42858731  | -7.00142244 | -3.15856600 |
| C | -1.52795269 | -7.47788144 | -2.31804600 |
| C | -4.36640569 | -6.23380244 | -0.34221600 |

|   |              |             |             |
|---|--------------|-------------|-------------|
| C | -4.44330969  | -4.95075444 | 0.16806300  |
| C | -3.12024069  | -6.32219844 | -1.08524200 |
| C | -3.28422869  | -4.23842644 | -0.26727400 |
| H | -1.60896169  | -4.87540244 | -1.39688500 |
| N | -2.69758869  | -7.41059044 | -1.68483300 |
| N | -3.02458269  | -2.96751944 | 0.02804900  |
| N | 1.21781631   | -1.92907544 | -1.82207100 |
| N | 1.55937031   | -6.38303544 | -3.52330100 |
| N | 1.06215031   | -4.23902844 | -2.52080000 |
| N | -0.59958269  | -6.48703044 | -2.44700900 |
| N | -2.51237869  | -5.09529644 | -1.00532600 |
| N | -0.86688369  | -2.86771144 | -1.05232800 |
| N | -5.84798769  | -1.55948544 | -0.10518600 |
| N | -5.49311569  | -4.43812144 | 0.96041200  |
| C | -11.04448069 | -7.03534044 | -1.06939300 |
| C | -9.10107469  | -6.52369544 | -0.21401200 |
| C | -13.99372169 | -5.83655844 | -2.93615200 |
| C | -14.13846369 | -4.52168344 | -3.40292500 |
| C | -12.70720269 | -5.92264244 | -2.25611400 |
| C | -12.94235469 | -3.78359944 | -3.01629200 |
| H | -11.23671869 | -4.44001744 | -1.95277700 |
| C | -11.38368369 | -0.47468544 | -3.24361200 |
| C | -10.13310569 | -0.14670544 | -2.70965000 |
| C | -11.59578669 | -1.88473244 | -2.90636000 |
| C | -9.64664669  | -1.37164344 | -2.07088200 |
| C | -6.71907769  | -2.59790244 | -0.22567600 |
| C | -6.58665669  | -3.88945644 | 0.25153200  |
| C | -8.01365869  | -2.50872244 | -0.86942000 |
| C | -7.77096469  | -4.60874044 | -0.10444100 |
| H | -9.50029369  | -3.98670044 | -1.15329300 |
| N | -8.47084669  | -1.42329244 | -1.45528400 |
| N | -7.99880169  | -5.89451344 | 0.15188900  |
| N | -12.22876069 | -7.00478544 | -1.69037700 |
| N | -12.71341069 | -2.52619344 | -3.28108900 |
| N | -12.14157369 | -4.67804944 | -2.34019100 |
| N | -10.55280769 | -2.38528644 | -2.21226100 |
| N | -8.60040769  | -3.74368744 | -0.76661600 |
| N | -10.16798069 | -6.02336344 | -0.90977500 |
| N | -5.23512769  | -7.25565644 | -0.18217600 |
| H | -6.17805569  | -7.01288344 | 0.11233100  |
| H | -5.11024369  | -8.06137144 | -0.77769200 |
| H | -4.86534269  | -1.80986544 | -0.01349200 |
| H | -6.05584469  | -0.75307144 | -0.67876600 |
| H | -5.14881069  | -3.80230944 | 1.67344600  |

|   |              |              |             |
|---|--------------|--------------|-------------|
| O | -1.27531069  | -5.16661444  | 1.76458700  |
| O | -1.68204869  | -6.28976744  | 1.66203900  |
| C | -0.91538369  | -10.91300544 | -3.84923000 |
| C | 0.34491831   | -10.60598944 | -4.39069300 |
| C | 0.90896531   | -9.34209044  | -4.23415100 |
| C | 0.17532931   | -8.39786044  | -3.52161300 |
| C | -1.07912369  | -8.70296144  | -2.98250100 |
| C | -1.64595669  | -9.96507844  | -3.13671500 |
| H | -1.32339769  | -11.90881944 | -3.99115500 |
| H | 0.88505831   | -11.37061144 | -4.94008300 |
| H | 1.88110731   | -9.09498544  | -4.64818500 |
| H | -2.61916169  | -10.19481744 | -2.71526500 |
| C | 4.15877331   | -4.83818844  | -4.33461400 |
| C | 5.16733331   | -3.90523844  | -4.53958500 |
| C | 5.06427531   | -2.59270644  | -4.03834900 |
| C | 3.94940831   | -2.18141144  | -3.31932400 |
| C | 2.93692531   | -3.11834344  | -3.11261400 |
| H | 4.22663731   | -5.85144444  | -4.71606500 |
| H | 6.05436331   | -4.18902144  | -5.09679600 |
| H | 5.87370931   | -1.89303544  | -4.21988800 |
| H | 3.85691631   | -1.17384344  | -2.92804900 |
| C | -1.84068069  | 1.27691956   | 0.83778600  |
| C | -2.39784569  | 0.00457756   | 0.70779900  |
| C | -0.41962769  | -0.63785444  | -0.55053700 |
| C | 0.14181031   | 0.62688356   | -0.42309200 |
| C | -0.59026869  | 1.58406956   | 0.27943000  |
| H | -2.38015569  | 2.04425156   | 1.38391000  |
| H | -3.35919769  | -0.23769444  | 1.15147700  |
| H | 1.11174131   | 0.85162656   | -0.85454400 |
| H | -0.18759369  | 2.58450456   | 0.40177500  |
| C | -9.60229369  | 1.13310556   | -2.84397500 |
| C | -10.36451569 | 2.07423256   | -3.53211400 |
| C | -11.62072969 | 1.74380356   | -4.06892700 |
| C | -12.14893969 | 0.46223056   | -3.93190000 |
| H | -8.63209069  | 1.38164256   | -2.42628700 |
| H | -9.98461169  | 3.08321256   | -3.65827800 |
| H | -12.18603769 | 2.50387856   | -4.59891700 |
| H | -13.11771769 | 0.19647256   | -4.34223600 |
| C | -16.11771569 | -6.39899044  | -3.84682900 |
| C | -14.98218669 | -6.79587244  | -3.15118400 |
| C | -15.27757969 | -4.12330544  | -4.10079500 |
| C | -16.26319069 | -5.07919844  | -4.31547700 |
| H | -16.90996169 | -7.11648244  | -4.03443800 |
| H | -14.85704569 | -7.80909344  | -2.78434300 |

|   |              |              |             |
|---|--------------|--------------|-------------|
| H | -15.37828469 | -3.10354444  | -4.45681600 |
| H | -17.16480269 | -4.80702144  | -4.85476600 |
| C | -10.31704869 | -10.50576844 | 0.33579600  |
| C | -9.07450169  | -10.17518644 | 0.89823300  |
| C | -8.55171469  | -8.88607944  | 0.79161400  |
| C | -9.30879369  | -7.94590344  | 0.10124200  |
| C | -10.54886869 | -8.27408344  | -0.45114100 |
| C | -11.07643669 | -9.55543444  | -0.34670700 |
| H | -10.69262769 | -11.51867344 | 0.44045100  |
| H | -8.51425569  | -10.93730944 | 1.43057200  |
| H | -7.59894869  | -8.62470344  | 1.24267500  |
| H | -12.04147469 | -9.79763444  | -0.77967200 |

10-quintet

SCF energy in solution: -3344.30424933

|   |              |             |             |
|---|--------------|-------------|-------------|
| C | 0.18461538   | 1.47692305  | 0.00000000  |
| C | 1.88395938   | 0.58239105  | -1.21770600 |
| C | -0.04226862  | 0.07864505  | -0.33091100 |
| C | 4.90460238   | -1.93974595 | -3.66851500 |
| C | 3.51006638   | -0.53323095 | -2.45975200 |
| C | 3.68766438   | -2.67581195 | -3.27692800 |
| H | 2.01380738   | -2.01150295 | -2.16471200 |
| C | 2.30737138   | -4.54851695 | -3.19887900 |
| C | 0.36169738   | -5.03569495 | -2.35276000 |
| C | -2.49688962  | -3.80516995 | -0.33705800 |
| C | -2.56988162  | -2.55445695 | 0.20675300  |
| C | -1.22060362  | -3.89309295 | -1.09979900 |
| C | -1.40517362  | -1.81443195 | -0.22461400 |
| H | 0.28302938   | -2.42630595 | -1.36933600 |
| N | -0.83348162  | -4.96911995 | -1.69583100 |
| N | -1.17072062  | -0.56773895 | 0.07482400  |
| N | 3.07739538   | 0.53106905  | -1.87476100 |
| N | 3.45212438   | -3.91057495 | -3.57652700 |
| N | 2.91295738   | -1.78262195 | -2.56469500 |
| N | 1.27922738   | -4.04142095 | -2.47727400 |
| N | -0.62102762  | -2.66667095 | -0.99142000 |
| N | 0.98784138   | -0.42557995 | -1.05415200 |
| N | -3.98033362  | 0.84375305  | -0.04123100 |
| N | -3.62353562  | -2.04704095 | 0.99482600  |
| C | -9.12199562  | -4.65672095 | -1.14788100 |
| C | -7.19820562  | -4.13939295 | -0.25207300 |
| C | -12.04941462 | -3.45891895 | -3.04845400 |
| C | -12.19885962 | -2.13863195 | -3.49883500 |

|   |              |             |             |
|---|--------------|-------------|-------------|
| C | -10.77399562 | -3.54270895 | -2.34856900 |
| C | -11.01672762 | -1.39552095 | -3.08185800 |
| H | -9.32216562  | -2.05121495 | -2.00096100 |
| C | -9.48560262  | 1.93076605  | -3.23533500 |
| C | -8.24669062  | 2.26157405  | -2.67659400 |
| C | -9.69079962  | 0.51421605  | -2.92186000 |
| C | -7.76011162  | 1.03166005  | -2.04747600 |
| C | -4.84592562  | -0.19510295 | -0.17949100 |
| C | -4.71113062  | -1.49162395 | 0.28328700  |
| C | -6.13527162  | -0.10705895 | -0.83656500 |
| C | -5.88539062  | -2.21521095 | -0.09634300 |
| H | -7.60767262  | -1.59171895 | -1.15727700 |
| N | -6.59248962  | 0.98160205  | -1.41485600 |
| N | -6.10518262  | -3.50659495 | 0.13831800  |
| N | -10.29460562 | -4.62828295 | -1.78907500 |
| N | -10.79514862 | -0.13174995 | -3.32430500 |
| N | -10.21866862 | -2.29207895 | -2.40571400 |
| N | -8.65414162  | 0.01282805  | -2.21730600 |
| N | -6.71465162  | -1.34725795 | -0.75586800 |
| N | -8.25609762  | -3.63943995 | -0.95970700 |
| N | -3.35087162  | -4.83356895 | -0.25844500 |
| H | -4.29210062  | -4.64556295 | 0.08049200  |
| H | -3.17056062  | -5.64250395 | -0.83568600 |
| H | -2.99697362  | 0.59413405  | 0.05564100  |
| H | -4.18725162  | 1.65904105  | -0.60228100 |
| H | -3.28312662  | -1.42061095 | 1.71812800  |
| O | 1.09941438   | -4.42956995 | 0.82466600  |
| O | 0.25062638   | -4.06910795 | 1.59058000  |
| C | 0.97373138   | -8.45539395 | -3.89764100 |
| C | 2.23005138   | -8.14131995 | -4.44415800 |
| C | 2.79091938   | -6.87504095 | -4.28459700 |
| C | 2.05967138   | -5.93474995 | -3.56422600 |
| C | 0.80360438   | -6.24786295 | -3.01826100 |
| C | 0.24250838   | -7.51292095 | -3.17678600 |
| H | 0.56836338   | -9.45188395 | -4.04186900 |
| H | 2.77035138   | -8.90123495 | -4.99972100 |
| H | 3.76018538   | -6.62373295 | -4.70295400 |
| H | -0.72768362  | -7.75050595 | -2.75258700 |
| C | 6.01350438   | -2.35058995 | -4.39164300 |
| C | 7.02390638   | -1.40958095 | -4.60696300 |
| C | 6.91497638   | -0.10506995 | -4.11082900 |
| C | 5.79339238   | 0.30151905  | -3.38326200 |
| C | 4.79534238   | -0.63785395 | -3.17317700 |
| H | 6.08245838   | -3.36517595 | -4.76964700 |



|   |              |             |             |
|---|--------------|-------------|-------------|
| H | 7.90866038   | -1.69242495 | -5.16803100 |
| H | 7.71751438   | 0.60169405  | -4.29567600 |
| H | 5.69601938   | 1.30914905  | -2.99319800 |
| C | -0.00751662  | 3.69991005  | 0.83857200  |
| C | -0.54575862  | 2.42015205  | 0.72103000  |
| C | 1.42412838   | 1.80145305  | -0.57705000 |
| C | 1.96376538   | 3.08062005  | -0.45815200 |
| C | 1.22986338   | 4.02579405  | 0.25497100  |
| H | -0.54810362  | 4.45979405  | 1.39389400  |
| H | -1.49407662  | 2.16486605  | 1.18536900  |
| H | 2.92196338   | 3.32301905  | -0.90627500 |
| H | 1.61876238   | 5.03278105  | 0.36837100  |
| C | -7.72441762  | 3.54736905  | -2.78427500 |
| C | -8.48342062  | 4.49182305  | -3.47148600 |
| C | -9.72794362  | 4.15863105  | -4.03317500 |
| C | -10.24752762 | 2.87093705  | -3.92280900 |
| H | -6.76318162  | 3.79786105  | -2.34748400 |
| H | -8.11001662  | 5.50553405  | -3.57738800 |
| H | -10.29103062 | 4.92144405  | -4.56159600 |
| H | -11.20720862 | 2.60309105  | -4.35268700 |
| C | -14.15280062 | -4.02756395 | -4.00232500 |
| C | -13.02540862 | -4.42401795 | -3.29368000 |
| C | -13.33024862 | -1.74074895 | -4.20979400 |
| C | -14.30295162 | -2.70234995 | -4.45450700 |
| H | -14.93505762 | -4.74946895 | -4.21343000 |
| H | -12.89700462 | -5.44124095 | -2.93924600 |
| H | -13.43470862 | -0.71691795 | -4.55282600 |
| H | -15.19807462 | -2.43077195 | -5.00479000 |
| C | -8.39380162  | -8.13687095 | 0.23257800  |
| C | -7.16572162  | -7.80265295 | 0.82398000  |
| C | -6.65138962  | -6.50853095 | 0.74105500  |
| C | -7.40045362  | -5.56660195 | 0.04402600  |
| C | -8.62722262  | -5.89845895 | -0.53543000 |
| C | -9.14670262  | -7.18491095 | -0.45462700 |
| H | -8.76368562  | -9.15354595 | 0.31930100  |
| H | -6.61108962  | -8.56559795 | 1.36100700  |
| H | -5.71202962  | -6.24457595 | 1.21803000  |
| H | -10.10146762 | -7.42943195 | -0.90855200 |

10-septet

SCF energy in solution: -3344.27057885

|   |            |             |             |
|---|------------|-------------|-------------|
| C | 0.04615385 | 0.49226550  | -0.00644408 |
| C | 1.72789285 | -0.39306050 | -1.25485708 |

|   |              |             |             |
|---|--------------|-------------|-------------|
| C | -0.18524515  | -0.90420950 | -0.34322608 |
| C | 4.72128585   | -2.89753250 | -3.75672408 |
| C | 3.33897485   | -1.49918550 | -2.52492008 |
| C | 3.51036585   | -3.63751150 | -3.35411608 |
| H | 1.84842785   | -2.98139650 | -2.21970308 |
| C | 2.13415085   | -5.51254850 | -3.26733408 |
| C | 0.19926085   | -6.00640650 | -2.40104108 |
| C | -2.64175215  | -4.78768650 | -0.35251008 |
| C | -2.70622615  | -3.54093050 | 0.20497492  |
| C | -1.36850115  | -4.87327050 | -1.12120208 |
| C | -1.54505015  | -2.80027950 | -0.22774308 |
| H | 0.13307285   | -3.40347150 | -1.39197708 |
| N | -0.98913915  | -5.94329550 | -1.73263808 |
| N | -1.30934115  | -1.55192950 | 0.07132092  |
| N | 2.91211885   | -0.43883150 | -1.92847308 |
| N | 3.27356585   | -4.87146150 | -3.65603108 |
| N | 2.74243485   | -2.74889350 | -2.62905708 |
| N | 1.11448485   | -5.01014850 | -2.53133008 |
| N | -0.76310915  | -3.65038350 | -0.99976908 |
| N | 0.83480785   | -1.40266350 | -1.08465808 |
| N | -4.09539615  | -0.16554050 | -0.14170208 |
| N | -3.75874815  | -3.04403550 | 0.99923592  |
| C | -9.27506915  | -5.61673750 | -1.19947408 |
| C | -7.37346215  | -5.10228750 | -0.26636708 |
| C | -12.18438115 | -4.39473850 | -3.15617308 |
| C | -12.31839015 | -3.07773550 | -3.60307008 |
| C | -10.90298115 | -4.49788650 | -2.43527208 |
| C | -11.12179815 | -2.33076350 | -3.17219408 |
| H | -9.43376515  | -3.00465050 | -2.08582908 |
| C | -9.58027515  | 0.97975150  | -3.28227108 |
| C | -8.34221715  | 1.30056450  | -2.70093808 |
| C | -9.79526615  | -0.42780750 | -2.98635508 |
| C | -7.87843515  | 0.07064350  | -2.08402408 |
| C | -4.95516415  | -1.19720450 | -0.18947708 |
| C | -4.84168215  | -2.46680850 | 0.30019992  |
| C | -6.28682515  | -1.07979650 | -0.84601408 |
| C | -6.04169115  | -3.19423050 | -0.06582808 |
| H | -7.77108415  | -2.55981250 | -1.13274208 |
| N | -6.68088415  | -0.00032850 | -1.43091008 |
| N | -6.24634915  | -4.46066550 | 0.14981692  |
| N | -10.45811915 | -5.57095450 | -1.87572208 |
| N | -10.91583415 | -1.07793950 | -3.41163008 |
| N | -10.32915715 | -3.23549350 | -2.49389608 |
| N | -8.76517115  | -0.94021050 | -2.26904008 |

|   |              |              |             |
|---|--------------|--------------|-------------|
| N | -6.89127715  | -2.30066950  | -0.71102208 |
| N | -8.39911515  | -4.59845850  | -0.99722408 |
| N | -3.50591915  | -5.80541250  | -0.28329608 |
| H | -4.44405315  | -5.61190850  | 0.06551192  |
| H | -3.33238515  | -6.61747650  | -0.85813508 |
| H | -3.11278215  | -0.37745750  | 0.02885192  |
| H | -4.33422615  | 0.65182650   | -0.68671708 |
| H | -3.42559215  | -2.45666050  | 1.75673492  |
| O | 0.97152685   | -5.44923950  | 0.77371192  |
| O | 0.12358985   | -5.10705550  | 1.54891292  |
| C | 0.79741485   | -9.41782350  | -3.96926608 |
| C | 2.04697485   | -9.09962650  | -4.52857108 |
| C | 2.60819985   | -7.83339250  | -4.36936308 |
| C | 1.88410285   | -6.89765350  | -3.63610908 |
| C | 0.63488585   | -7.21492250  | -3.07727208 |
| C | 0.07331785   | -8.47978150  | -3.23546508 |
| H | 0.39153085   | -10.41405850 | -4.11372908 |
| H | 2.58172485   | -9.85621850  | -5.09393708 |
| H | 3.57224185   | -7.57880850  | -4.79768108 |
| H | -0.89172615  | -8.72056350  | -2.80146908 |
| C | 5.82227785   | -3.30329850  | -4.49466008 |
| C | 6.82850385   | -2.35963050  | -4.71761408 |
| C | 6.72324885   | -1.05753750  | -4.21431608 |
| C | 5.60970985   | -0.65612150  | -3.47173708 |
| C | 4.61564985   | -1.59807650  | -3.25424408 |
| H | 5.88845285   | -4.31608150  | -4.87795208 |
| H | 7.70708085   | -2.63840750  | -5.29028408 |
| H | 7.52242485   | -0.34862550  | -4.40538208 |
| H | 5.51538785   | 0.34954450   | -3.07590308 |
| C | -0.13293515  | 2.70980450   | 0.85112092  |
| C | -0.67196315  | 1.43055750   | 0.73329692  |
| C | 1.27649085   | 0.82156450   | -0.60019508 |
| C | 1.81743185   | 2.10024150   | -0.48097108 |
| C | 1.09472285   | 3.04040450   | 0.24970992  |
| H | -0.66443415  | 3.46528150   | 1.42103092  |
| H | -1.61117315  | 1.17147550   | 1.21377792  |
| H | 2.76863085   | 2.34576550   | -0.94211208 |
| H | 1.48506485   | 4.04673050   | 0.36385292  |
| C | -7.81296915  | 2.58581850   | -2.79222308 |
| C | -8.55796815  | 3.54093950   | -3.48161708 |
| C | -9.79682215  | 3.21945550   | -4.06274408 |
| C | -10.32550015 | 1.93290950   | -3.97105608 |
| H | -6.85626315  | 2.82928450   | -2.34154908 |
| H | -8.17737515  | 4.55325450   | -3.57354708 |

|   |              |              |             |
|---|--------------|--------------|-------------|
| H | -10.34868815 | 3.98977350   | -4.59198908 |
| H | -11.28075715 | 1.67567450   | -4.41710608 |
| C | -14.28635915 | -4.93677250  | -4.12744208 |
| C | -13.16107915 | -5.34629950  | -3.40723008 |
| C | -13.43199915 | -2.66333950  | -4.31692608 |
| C | -14.42013115 | -3.61711550  | -4.57509508 |
| H | -15.07235115 | -5.65293350  | -4.34433708 |
| H | -13.04498315 | -6.36522250  | -3.05325208 |
| H | -13.52121915 | -1.63664850  | -4.65602708 |
| H | -15.30727215 | -3.33225150  | -5.13135908 |
| C | -8.59564515  | -9.07937050  | 0.21607492  |
| C | -7.37631915  | -8.74573150  | 0.83235792  |
| C | -6.85644115  | -7.45551350  | 0.75125192  |
| C | -7.58593015  | -6.51024350  | 0.03213292  |
| C | -8.80806515  | -6.84223650  | -0.57601608 |
| C | -9.33003315  | -8.13147950  | -0.49314308 |
| H | -8.97093815  | -10.09421150 | 0.30194292  |
| H | -6.83644615  | -9.50744850  | 1.38588092  |
| H | -5.92565015  | -7.19192150  | 1.24534692  |
| H | -10.27533815 | -8.37949150  | -0.96495608 |

TS11s

SCF energy in solution: -3344.27422

Free energy in solution: -3343.5437

|   |             |             |             |
|---|-------------|-------------|-------------|
| C | -0.68475453 | 3.03617567  | 0.00000000  |
| C | 0.92038247  | 2.15563267  | -1.36315400 |
| C | -0.93934153 | 1.63676367  | -0.35377400 |
| C | 3.72828147  | -0.33474133 | -4.05098300 |
| C | 2.43799847  | 1.05313467  | -2.74397500 |
| C | 2.54393947  | -1.04729533 | -3.61346300 |
| H | 0.93772347  | -0.39338233 | -2.40938800 |
| C | 1.15604047  | -2.91600933 | -3.49569400 |
| C | -0.74059053 | -3.40995533 | -2.54090100 |
| C | -3.47967253 | -2.22168133 | -0.41271400 |
| C | -3.41580553 | -1.01998133 | 0.37772500  |
| C | -2.22938153 | -2.31153533 | -1.13975500 |
| C | -2.28720353 | -0.24788333 | -0.19104100 |
| H | -0.64215553 | -0.93394033 | -1.30657800 |
| N | -1.88179153 | -3.35461733 | -1.84388600 |
| N | -2.03020853 | 0.99551467  | 0.09913100  |
| N | 2.03047347  | 2.11999867  | -2.08513500 |
| N | 2.24819547  | -2.29220433 | -3.92078100 |
| N | 1.82422547  | -0.16791733 | -2.84447600 |

|   |              |             |             |
|---|--------------|-------------|-------------|
| N | 0.17898147   | -2.42771733 | -2.67940500 |
| N | -1.56004253  | -1.13235733 | -0.92183500 |
| N | 0.02235947   | 1.14508367  | -1.15790600 |
| N | -4.71877853  | 2.44516967  | -0.08725500 |
| N | -4.55308853  | -0.47000533 | 0.99332500  |
| C | -10.08837553 | -2.78681333 | -1.37204400 |
| C | -8.17076353  | -2.37263233 | -0.41392400 |
| C | -12.85337453 | -1.45154833 | -3.41832800 |
| C | -12.90197653 | -0.13415733 | -3.89761900 |
| C | -11.61807353 | -1.59745233 | -2.65836800 |
| C | -11.69661453 | 0.54530467  | -3.43860000 |
| H | -10.09784453 | -0.18764033 | -2.26492500 |
| C | -9.96503053  | 3.77192167  | -3.57162100 |
| C | -8.73284653  | 4.03977967  | -2.96629700 |
| C | -10.26272753 | 2.37331267  | -3.25236500 |
| C | -8.34215953  | 2.79190867  | -2.30664400 |
| C | -5.59165953  | 1.43035767  | -0.29201900 |
| C | -5.53880753  | 0.12449067  | 0.17376700  |
| C | -6.83597653  | 1.57424767  | -1.02218300 |
| C | -6.73728553  | -0.53404133 | -0.25157300 |
| H | -8.36330153  | 0.16298967  | -1.40891800 |
| N | -7.20802753  | 2.68238967  | -1.62430300 |
| N | -7.05417753  | -1.80215933 | 0.00261900  |
| N | -11.23083553 | -2.69924133 | -2.06056700 |
| N | -11.38773453 | 1.78747767  | -3.69146000 |
| N | -10.98598953 | -0.38397733 | -2.71005100 |
| N | -9.28562053  | 1.82201167  | -2.50309900 |
| N | -7.47996553  | 0.36592267  | -0.96395900 |
| N | -9.16722253  | -1.82177233 | -1.17085100 |
| N | -4.44077153  | -3.12193833 | -0.42802700 |
| H | -5.34877753  | -2.89676033 | -0.01551300 |
| H | -4.29274153  | -3.98298933 | -0.93669200 |
| H | -3.75489753  | 2.18527367  | 0.11027300  |
| H | -4.87279653  | 3.27848467  | -0.63851700 |
| H | -4.29772753  | 0.07689967  | 1.81070800  |
| O | -2.65808653  | -1.87048833 | 1.61310200  |
| O | -1.36361553  | -1.71294933 | 1.68193900  |
| C | -0.28890753  | -6.77875833 | -4.26421000 |
| C | 0.93537447   | -6.46146633 | -4.87578600 |
| C | 1.52779347   | -5.21210033 | -4.70194400 |
| C | 0.85882447   | -4.29452233 | -3.89871900 |
| C | -0.35983553  | -4.60967833 | -3.29078900 |
| C | -0.95519653  | -5.85561533 | -3.46079900 |
| H | -0.71981853  | -7.76241533 | -4.42169700 |

|   |              |             |             |
|---|--------------|-------------|-------------|
| H | 1.42635747   | -7.20649433 | -5.49383000 |
| H | 2.47326047   | -4.95755833 | -5.16957300 |
| H | -1.89963253  | -6.09443733 | -2.98290300 |
| C | 4.80438347   | -0.73492433 | -4.84722300 |
| C | 5.80284147   | 0.19669267  | -5.08866000 |
| C | 5.73656247   | 1.49971167  | -4.55051800 |
| C | 4.67046347   | 1.89966467  | -3.75914200 |
| C | 3.66185947   | 0.96356767  | -3.51509900 |
| H | 4.84507447   | -1.73972933 | -5.25406300 |
| H | 6.65495647   | -0.07722333 | -5.70237200 |
| H | 6.53916847   | 2.19880367  | -4.76230700 |
| H | 4.60963447   | 2.89780967  | -3.33866900 |
| C | -0.80572153  | 5.23065167  | 0.91192200  |
| C | -1.35848553  | 3.95588267  | 0.79826500  |
| C | 0.50773347   | 3.36940167  | -0.64975600 |
| C | 1.06441247   | 4.63853267  | -0.53700500 |
| C | 0.38730147   | 5.56729867  | 0.25204300  |
| H | -1.30018153  | 5.97607467  | 1.52650100  |
| H | -2.26957353  | 3.68861967  | 1.32570300  |
| H | 1.99139847   | 4.88679167  | -1.04344300 |
| H | 0.79008747   | 6.56862967  | 0.36652200  |
| C | -8.13540053  | 5.29306767  | -3.06570900 |
| C | -8.81258353  | 6.26973467  | -3.79242300 |
| C | -10.05059153 | 5.99965867  | -4.40040800 |
| C | -10.64554353 | 4.74436567  | -4.29835500 |
| H | -7.17958453  | 5.49559067  | -2.59361900 |
| H | -8.37899853  | 7.25969267  | -3.89316600 |
| H | -10.54865153 | 6.78617767  | -4.95842900 |
| H | -11.60099653 | 4.52509167  | -4.76365700 |
| C | -14.94102453 | -1.91286533 | -4.45977200 |
| C | -13.87293153 | -2.36181233 | -3.69239900 |
| C | -13.97295453 | 0.31634567  | -4.66754500 |
| C | -14.98997253 | -0.59065533 | -4.94096000 |
| H | -15.75495753 | -2.59097933 | -4.69478000 |
| H | -13.82253953 | -3.37768833 | -3.31525200 |
| H | -13.99967153 | 1.33737467  | -5.03293700 |
| H | -15.84098053 | -0.27721433 | -5.53699400 |
| C | -9.63228953  | -6.27477133 | 0.10368200  |
| C | -8.40819853  | -6.00502433 | 0.73454400  |
| C | -7.81065453  | -4.74731833 | 0.64597100  |
| C | -8.47379053  | -3.77717033 | -0.09714600 |
| C | -9.69664853  | -4.04399133 | -0.71674200 |
| C | -10.29865153 | -5.29331733 | -0.63049100 |
| H | -10.06842453 | -7.26422133 | 0.19639500  |

|   |              |             |             |
|---|--------------|-------------|-------------|
| H | -7.92296353  | -6.78876633 | 1.30742300  |
| H | -6.87531453  | -4.53085633 | 1.15399000  |
| H | -11.24965553 | -5.48850633 | -1.11509300 |

TS11t

SCF energy in solution: -3344.289664

Free energy in solution: -3343.563084

|   |              |             |             |
|---|--------------|-------------|-------------|
| C | 0.58139536   | 1.07235141  | 0.00000000  |
| C | 2.05553336   | 0.22517841  | -1.51994200 |
| C | 0.25725736   | -0.29502559 | -0.40448500 |
| C | 4.55102336   | -2.17276359 | -4.58140400 |
| C | 3.42462036   | -0.83335559 | -3.07914100 |
| C | 3.36735636   | -2.87343959 | -4.10112400 |
| H | 1.89362736   | -2.24948659 | -2.72618200 |
| C | 1.89842836   | -4.67859059 | -4.01238500 |
| C | 0.05192936   | -5.17317959 | -2.95582600 |
| C | -2.43973764  | -4.05092459 | -0.54376900 |
| C | -2.31173564  | -2.87886859 | 0.28845300  |
| C | -1.27987464  | -4.13403359 | -1.35417100 |
| C | -1.14213364  | -2.14529759 | -0.27455800 |
| H | 0.33708636   | -2.77691159 | -1.62838400 |
| N | -1.01647164  | -5.13501859 | -2.17155000 |
| N | -0.81955764  | -0.93407259 | 0.09118000  |
| N | 3.11646236   | 0.19543141  | -2.32916000 |
| N | 2.99807536   | -4.07227559 | -4.47810400 |
| N | 2.75118736   | -2.02585159 | -3.21531900 |
| N | 1.01999536   | -4.21639159 | -3.09636000 |
| N | -0.52968064  | -2.97833259 | -1.14675900 |
| N | 1.14585436   | -0.76747959 | -1.30483700 |
| N | -3.43048764  | 0.64219441  | -0.28704000 |
| N | -3.43361464  | -2.24473759 | 0.86514700  |
| C | -9.01054864  | -4.34910959 | -1.62428900 |
| C | -7.10585464  | -4.00755859 | -0.61271500 |
| C | -11.62911764 | -2.93559059 | -3.80665500 |
| C | -11.59048764 | -1.63339259 | -4.32644300 |
| C | -10.43044864 | -3.12214859 | -2.99817700 |
| C | -10.36712964 | -1.00360059 | -3.84390700 |
| H | -8.85184564  | -1.78241259 | -2.59142100 |
| C | -8.46433264  | 2.12370041  | -4.00545200 |
| C | -7.24178964  | 2.34576241  | -3.36323400 |
| C | -8.84537864  | 0.75194841  | -3.65895700 |
| C | -6.93931064  | 1.09908941  | -2.65673400 |
| C | -4.33551264  | -0.34176259 | -0.50885000 |

|   |              |             |             |
|---|--------------|-------------|-------------|
| C | -4.36359764  | -1.63614659 | -0.01095200 |
| C | -5.54230864  | -0.15814859 | -1.28981000 |
| C | -5.57892064  | -2.24620259 | -0.45916800 |
| H | -7.12345664  | -1.50281259 | -1.69597300 |
| N | -5.83708464  | 0.95143641  | -1.93150500 |
| N | -5.97565464  | -3.48421759 | -0.17354600 |
| N | -10.12385664 | -4.22299559 | -2.35449900 |
| N | -9.98435464  | 0.21229441  | -4.12149700 |
| N | -9.73301064  | -1.94548259 | -3.06291400 |
| N | -7.92474164  | 0.17318541  | -2.86107100 |
| N | -6.24643764  | -1.33167559 | -1.22600600 |
| N | -8.04546464  | -3.42922659 | -1.42178100 |
| N | -3.40849364  | -4.97787859 | -0.44646600 |
| H | -4.30908664  | -4.68175859 | -0.07057500 |
| H | -3.39652364  | -5.72262959 | -1.13035700 |
| H | -2.48809164  | 0.35691541  | -0.03473600 |
| H | -3.52791464  | 1.47005941  | -0.85888500 |
| H | -3.14796964  | -1.62749159 | 1.62173200  |
| O | -1.64391764  | -3.48911359 | 1.81520700  |
| O | -0.53025764  | -4.05691259 | 1.69503300  |
| C | 0.22676936   | -8.40350459 | -4.97394600 |
| C | 1.41641636   | -8.08625659 | -5.64984100 |
| C | 2.07569536   | -6.87943759 | -5.42231800 |
| C | 1.50817436   | -6.00647459 | -4.50054200 |
| C | 0.32419636   | -6.32082859 | -3.82834100 |
| C | -0.33725364  | -7.52389159 | -4.05124500 |
| H | -0.25926064  | -9.35285059 | -5.17578200 |
| H | 1.82667036   | -8.79648259 | -6.36077000 |
| H | 2.99539636   | -6.62356759 | -5.93820400 |
| H | -1.25486564  | -7.76309759 | -3.52375600 |
| C | 5.53830236   | -2.55728959 | -5.48771900 |
| C | 6.55809036   | -1.65001259 | -5.74664100 |
| C | 6.59241536   | -0.39037859 | -5.11737600 |
| C | 5.60881436   | -0.00707159 | -4.21429300 |
| C | 4.58443336   | -0.91752659 | -3.95441200 |
| H | 5.49966136   | -3.53078359 | -5.96488900 |
| H | 7.34521436   | -1.91275059 | -6.44601100 |
| H | 7.40559836   | 0.29134541  | -5.34503200 |
| H | 5.62520336   | 0.96008741  | -3.72320400 |
| C | 0.58774736   | 3.22324341  | 1.02041900  |
| C | -0.00924464  | 1.97177941  | 0.88471100  |
| C | 1.73620736   | 1.40652841  | -0.71811400 |
| C | 2.33651836   | 2.65497241  | -0.58214500 |
| C | 1.74415336   | 3.56000441  | 0.29602500  |



|   |              |             |             |
|---|--------------|-------------|-------------|
| H | 0.15763036   | 3.95145041  | 1.70063700  |
| H | -0.89406064  | 1.70397741  | 1.45501000  |
| H | 3.23205736   | 2.90512141  | -1.14159000 |
| H | 2.18331436   | 4.54359541  | 0.42939000  |
| C | -6.57697664  | 3.56368741  | -3.47439800 |
| C | -7.17682964  | 4.55240841  | -4.25090400 |
| C | -8.40515264  | 4.32838441  | -4.89609400 |
| C | -9.06763464  | 3.10834241  | -4.78217400 |
| H | -5.62882964  | 3.73051341  | -2.97373900 |
| H | -6.68911064  | 5.51569341  | -4.36233700 |
| H | -8.84172264  | 5.12292441  | -5.49291100 |
| H | -10.01635364 | 2.92472341  | -5.27585800 |
| C | -13.70062364 | -3.32025759 | -4.90952500 |
| C | -12.68544764 | -3.79963159 | -4.09038100 |
| C | -12.60830264 | -1.15240159 | -5.14827000 |
| C | -13.66207864 | -2.01334459 | -5.43157300 |
| H | -14.54082164 | -3.96212359 | -5.15378700 |
| H | -12.70221164 | -4.80425259 | -3.68138900 |
| H | -12.56772464 | -0.14349859 | -5.54479000 |
| H | -14.47362164 | -1.67498959 | -6.06769600 |
| C | -8.79224564  | -7.80936559 | -0.03463500 |
| C | -7.57504664  | -7.58684259 | 0.62723000  |
| C | -6.90770364  | -6.36581359 | 0.52375900  |
| C | -7.49539764  | -5.38324159 | -0.26500500 |
| C | -8.71019564  | -5.60347959 | -0.91779900 |
| C | -9.38118964  | -6.81609959 | -0.81733700 |
| H | -9.28352364  | -8.77138459 | 0.07056700  |
| H | -7.14954364  | -8.37919159 | 1.23472900  |
| H | -5.97470464  | -6.18660159 | 1.04999000  |
| H | -10.32494364 | -6.97499359 | -1.32865000 |

12s

SCF energy in solution: -3344.283404

Free energy in solution: -3343.551219

|   |             |             |             |
|---|-------------|-------------|-------------|
| C | -2.58397932 | 0.73643410  | 0.00000000  |
| C | -1.10287732 | -0.10078890 | -1.52314300 |
| C | -2.84750032 | -0.66537790 | -0.34352000 |
| C | 1.44400568  | -2.52213290 | -4.51359200 |
| C | 0.28061368  | -1.16956490 | -3.06503600 |
| C | 0.31122568  | -3.24562590 | -3.98747200 |
| H | -1.17752832 | -2.62888190 | -2.62481300 |
| C | -1.06525132 | -5.11908890 | -3.79921500 |
| C | -2.87493632 | -5.62971690 | -2.69496100 |

|   |              |             |             |
|---|--------------|-------------|-------------|
| C | -5.42832632  | -4.50747390 | -0.31873700 |
| C | -5.27188332  | -3.36508390 | 0.61872400  |
| C | -4.21592032  | -4.58441390 | -1.11378700 |
| C | -4.13368932  | -2.57180490 | -0.02974300 |
| H | -2.64975932  | -3.20224490 | -1.37006900 |
| N | -3.95696832  | -5.59258190 | -1.89428500 |
| N | -3.88693532  | -1.32634390 | 0.21857200  |
| N | -0.07730832  | -0.11388790 | -2.34526500 |
| N | -0.02035132  | -4.48730490 | -4.29860100 |
| N | -0.33560232  | -2.38887590 | -3.13412600 |
| N | -1.97138532  | -4.65225490 | -2.87692800 |
| N | -3.52365332  | -3.41869190 | -0.89815100 |
| N | -1.97090432  | -1.13544990 | -1.23521100 |
| N | -6.44736332  | 0.22379610  | 0.07831400  |
| N | -6.43334332  | -2.72471290 | 1.12694200  |
| C | -11.87649632 | -4.82673290 | -1.60954300 |
| C | -10.01418632 | -4.48230590 | -0.52400400 |
| C | -14.44260432 | -3.39325090 | -3.83920500 |
| C | -14.41239032 | -2.07379790 | -4.31488600 |
| C | -13.27033332 | -3.58269090 | -2.99470900 |
| C | -13.22062632 | -1.43709690 | -3.76810600 |
| H | -11.73515732 | -2.22632890 | -2.48781300 |
| C | -11.38093032 | 1.73236510  | -3.75332600 |
| C | -10.18624432 | 1.95571310  | -3.06129000 |
| C | -11.74369332 | 0.34116710  | -3.46979900 |
| C | -9.88104132  | 0.69023010  | -2.39021500 |
| C | -7.31443632  | -0.77311590 | -0.21120400 |
| C | -7.32170832  | -2.08953990 | 0.23239200  |
| C | -8.50194332  | -0.58637190 | -1.02328900 |
| C | -8.51643932  | -2.70280790 | -0.27263800 |
| H | -10.03960432 | -1.94707390 | -1.52855700 |
| N | -8.79985132  | 0.53920410  | -1.63325800 |
| N | -8.90241332  | -3.95519190 | -0.03845700 |
| N | -12.96400732 | -4.69804390 | -2.37459500 |
| N | -12.85315632 | -0.20453390 | -3.99039000 |
| N | -12.59518332 | -2.39163790 | -2.99606300 |
| N | -10.83733132 | -0.24759790 | -2.66105800 |
| N | -9.18137332  | -1.77543890 | -1.02492900 |
| N | -10.93351432 | -3.89668990 | -1.34685600 |
| N | -6.40461832  | -5.37113190 | -0.34317300 |
| H | -7.30914832  | -5.11820390 | 0.07230800  |
| H | -6.29421532  | -6.21307390 | -0.89666100 |
| H | -5.50180132  | -0.06186390 | 0.32272900  |
| H | -6.55365032  | 1.07231510  | -0.46145000 |

|   |              |             |             |
|---|--------------|-------------|-------------|
| H | -6.20472332  | -2.18276090 | 1.95616100  |
| O | -4.66264332  | -4.16827690 | 1.62926800  |
| O | -3.34496632  | -3.79455090 | 1.84339300  |
| C | -2.61198432  | -8.94674890 | -4.55212500 |
| C | -1.44263732  | -8.61904290 | -5.25871300 |
| C | -0.82486932  | -7.38007790 | -5.10051800 |
| C | -1.41120732  | -6.48213490 | -4.21446900 |
| C | -2.57516032  | -6.80775590 | -3.51219300 |
| C | -3.19579832  | -8.04364690 | -3.66621600 |
| H | -3.06452332  | -9.92203990 | -4.70043200 |
| H | -1.01472032  | -9.34830490 | -5.93935200 |
| H | 0.07855568   | -7.11829090 | -5.64151600 |
| H | -4.09680532  | -8.29073490 | -3.11429500 |
| C | 2.44506468   | -2.89617890 | -5.41780600 |
| C | 3.41118168   | -1.95467090 | -5.72938100 |
| C | 3.39089868   | -0.66189290 | -5.15681800 |
| C | 2.40410068   | -0.28605290 | -4.26168600 |
| C | 1.42321068   | -1.23356690 | -3.94333400 |
| H | 2.45194268   | -3.89100190 | -5.85041400 |
| H | 4.20320368   | -2.20909590 | -6.42641100 |
| H | 4.16770668   | 0.04597010  | -5.42760800 |
| H | 2.37983568   | 0.70245610  | -3.81543600 |
| C | -2.65108432  | 2.91667010  | 0.95082200  |
| C | -3.18958832  | 1.63240610  | 0.87566900  |
| C | -1.46675632  | 1.09758010  | -0.75835100 |
| C | -0.92375432  | 2.37496510  | -0.68391400 |
| C | -1.53630432  | 3.28242210  | 0.18005400  |
| H | -3.09381132  | 3.64483110  | 1.62278800  |
| H | -4.03503732  | 1.34094510  | 1.49218400  |
| H | -0.05470432  | 2.64556910  | -1.27459400 |
| H | -1.14096032  | 4.28946010  | 0.26742500  |
| C | -9.54411832  | 3.18977010  | -3.10506200 |
| C | -10.13824832 | 4.19395410  | -3.86614300 |
| C | -11.33847832 | 3.96877310  | -4.56154200 |
| C | -11.97828632 | 2.73217610  | -4.51488200 |
| H | -8.61743832  | 3.35723210  | -2.56594700 |
| H | -9.66793232  | 5.17035110  | -3.92574000 |
| H | -11.77130232 | 4.77558410  | -5.14440800 |
| H | -12.90527532 | 2.54778410  | -5.04792400 |
| C | -16.46547132 | -3.78117790 | -5.02772400 |
| C | -15.47041132 | -4.26776890 | -4.18868400 |
| C | -15.41036232 | -1.58566490 | -5.15680800 |
| C | -16.43534932 | -2.45705690 | -5.50546800 |
| H | -17.28314332 | -4.43066090 | -5.32286800 |

|   |              |             |             |
|---|--------------|-------------|-------------|
| H | -15.48130632 | -5.28549590 | -3.81334000 |
| H | -15.37671332 | -0.56361790 | -5.51875600 |
| H | -17.23073532 | -2.11373090 | -6.15904700 |
| C | -11.66008832 | -8.32228990 | -0.09908400 |
| C | -10.47479732 | -8.09664990 | 0.61731100  |
| C | -9.82405832  | -6.86336690 | 0.56842700  |
| C | -10.39318132 | -5.87188690 | -0.22341500 |
| C | -11.57913632 | -6.09466290 | -0.92694800 |
| C | -12.23386532 | -7.31936490 | -0.88062500 |
| H | -12.13997732 | -9.29356490 | -0.03523500 |
| H | -10.06322332 | -8.89499090 | 1.22649300  |
| H | -8.92193932  | -6.68143390 | 1.14558800  |
| H | -13.15525632 | -7.47961590 | -1.43078400 |

12t

SCF energy in solution: -3344.298784

Free energy in solution: -3343.570056

|   |             |             |             |
|---|-------------|-------------|-------------|
| C | 0.28423772  | 0.91731265  | 0.00000000  |
| C | -0.68982428 | 0.35372165  | 1.98103400  |
| C | 0.89328072  | -0.26155435 | 0.61500300  |
| C | -2.07211628 | -1.38685835 | 6.03360500  |
| C | -1.51718628 | -0.39199235 | 4.02680500  |
| C | -0.92846628 | -2.08523435 | 5.44538500  |
| H | 0.08750872  | -1.72211635 | 3.63460500  |
| C | 0.74355972  | -3.70215735 | 5.40385700  |
| C | 2.37752272  | -4.30227235 | 4.07507900  |
| C | 4.08968172  | -3.64565335 | 0.96416300  |
| C | 3.68861572  | -2.64408035 | -0.08692600 |
| C | 3.18434572  | -3.58921735 | 1.99999000  |
| C | 2.50112572  | -1.93029935 | 0.58265500  |
| H | 1.51274972  | -2.29568235 | 2.37854900  |
| N | 3.21647072  | -4.37955935 | 3.08122600  |
| N | 1.93812772  | -0.89361735 | 0.02878900  |
| N | -1.53625628 | 0.42989165  | 3.01152800  |
| N | -0.31702028 | -3.10228035 | 5.98890700  |
| N | -0.65803328 | -1.44924535 | 4.26230200  |
| N | 1.31649572  | -3.41324835 | 4.23441900  |
| N | 2.25173872  | -2.55330635 | 1.73559200  |
| N | 0.30301972  | -0.57169435 | 1.78243500  |
| N | 4.24466572  | 1.08464865  | 0.38368000  |
| N | 4.74650272  | -1.83825135 | -0.62238900 |
| C | 10.36268372 | -2.97321435 | 2.34693400  |
| C | 8.53172772  | -2.94497435 | 1.15639600  |

|   |             |             |             |
|---|-------------|-------------|-------------|
| C | 12.50715172 | -1.15202835 | 4.73500300  |
| C | 12.22117772 | 0.13492865  | 5.21409300  |
| C | 11.43605872 | -1.52919735 | 3.82095300  |
| C | 10.97040372 | 0.56434165  | 4.60011400  |
| H | 9.71855772  | -0.45283835 | 3.23354000  |
| C | 8.61701172  | 3.37045865  | 4.48117600  |
| C | 7.44352972  | 3.39271265  | 3.72045200  |
| C | 9.22907472  | 2.06511565  | 4.21894300  |
| C | 7.39864772  | 2.10022965  | 3.03318600  |
| C | 5.24133672  | 0.23323565  | 0.72581800  |
| C | 5.49615772  | -1.06034235 | 0.29169600  |
| C | 6.33584372  | 0.61443465  | 1.59680700  |
| C | 6.75591172  | -1.46157135 | 0.84651200  |
| H | 8.06038472  | -0.46325635 | 2.17554300  |
| N | 6.40346072  | 1.77153065  | 2.21813700  |
| N | 7.37446572  | -2.61543935 | 0.61208200  |
| N | 11.36693572 | -2.66905535 | 3.17610500  |
| N | 10.38460172 | 1.71243165  | 4.80375500  |
| N | 10.56499072 | -0.47306235 | 3.78901200  |
| N | 8.48607072  | 1.33827965  | 3.35887500  |
| N | 7.20818772  | -0.43966635 | 1.63444600  |
| N | 9.28482872  | -2.22257235 | 2.04172000  |
| N | 5.10424172  | -4.51593835 | 0.77645900  |
| H | 5.90909472  | -4.14108935 | 0.27686100  |
| H | 5.32510072  | -5.09629835 | 1.57672300  |
| H | 3.37443872  | 0.68559765  | 0.04853100  |
| H | 4.18815472  | 1.93952965  | 0.92017300  |
| H | 4.39068972  | -1.28340835 | -1.39895000 |
| O | 3.19905972  | -3.33974435 | -1.28689400 |
| O | 2.11790072  | -4.02071135 | -1.05023800 |
| C | 3.08954872  | -6.89871035 | 6.77931000  |
| C | 2.04065772  | -6.51574335 | 7.62909000  |
| C | 1.18467672  | -5.46771435 | 7.29002900  |
| C | 1.41559272  | -4.82408535 | 6.08053800  |
| C | 2.45826972  | -5.20347535 | 5.23542200  |
| C | 3.31413172  | -6.24663435 | 5.56655700  |
| H | 3.73680072  | -7.71873435 | 7.07423100  |
| H | 1.89622172  | -7.04631035 | 8.56488400  |
| H | 0.36970472  | -5.16079135 | 7.93733900  |
| H | 4.12280072  | -6.53787635 | 4.90423000  |
| C | -2.76212528 | -1.60762935 | 7.22198100  |
| C | -3.82400428 | -0.75698035 | 7.51395800  |
| C | -4.18303128 | 0.28512565  | 6.64041200  |
| C | -3.49189328 | 0.50484765  | 5.45353100  |

|   |             |             |             |
|---|-------------|-------------|-------------|
| C | -2.42928128 | -0.34813435 | 5.16237800  |
| H | -2.47278828 | -2.41547135 | 7.88579900  |
| H | -4.38740428 | -0.89691935 | 8.43077500  |
| H | -5.01708928 | 0.92888665  | 6.90090700  |
| H | -3.76024428 | 1.30536765  | 4.77240100  |
| C | -0.26224928 | 2.72406165  | -1.45053700 |
| C | 0.53413072  | 1.61265365  | -1.18018900 |
| C | -0.73158528 | 1.31151565  | 0.88069400  |
| C | -1.53036728 | 2.41971265  | 0.61140400  |
| C | -1.27972128 | 3.12124865  | -0.56604000 |
| H | -0.09958928 | 3.29215565  | -2.36085600 |
| H | 1.31329572  | 1.29288565  | -1.86566200 |
| H | -2.31639228 | 2.71859965  | 1.29724700  |
| H | -1.88203728 | 3.99061465  | -0.81025300 |
| C | 6.59758972  | 4.49809865  | 3.72709400  |
| C | 6.96584672  | 5.58176265  | 4.52108300  |
| C | 8.14492472  | 5.55864265  | 5.28546300  |
| C | 8.98888972  | 4.45035965  | 5.27631700  |
| H | 5.68834472  | 4.50963865  | 3.13497800  |
| H | 6.33228872  | 6.46255065  | 4.55297000  |
| H | 8.39872172  | 6.42185965  | 5.89251200  |
| H | 9.90136372  | 4.42188665  | 5.86290300  |
| C | 14.49442472 | -1.20252835 | 6.04029500  |
| C | 13.64895472 | -1.84088735 | 5.14091200  |
| C | 13.06910272 | 0.77548865  | 6.11610200  |
| C | 14.20773772 | 0.08913265  | 6.52148200  |
| H | 15.39369072 | -1.70554235 | 6.38072800  |
| H | 13.85744072 | -2.83579235 | 4.76208100  |
| H | 12.83780572 | 1.77086765  | 6.48008000  |
| H | 14.89225472 | 0.55491065  | 7.22309200  |
| C | 10.86187272 | -6.42100635 | 0.79536600  |
| C | 9.69444072  | -6.39878235 | 0.01712200  |
| C | 8.83131572  | -5.30266535 | 0.03851400  |
| C | 9.17233972  | -4.23735935 | 0.86436500  |
| C | 10.33805172 | -4.25850635 | 1.63331900  |
| C | 11.20323972 | -5.34568535 | 1.61565200  |
| H | 11.51003172 | -7.29045335 | 0.75237000  |
| H | 9.46307972  | -7.24942835 | -0.61595100 |
| H | 7.93717372  | -5.27876535 | -0.57722000 |
| H | 12.10583472 | -5.34927435 | 2.21788400  |

12-quintet

SCF energy in solution: -3344.26562230

|   |             |             |             |
|---|-------------|-------------|-------------|
| C | 0.55384614  | 0.01538462  | 0.00000000  |
| C | -0.46315886 | -0.49086438 | 1.97465500  |
| C | 1.13306914  | -1.15915838 | 0.64939800  |
| C | -1.94635686 | -2.13261638 | 6.03252700  |
| C | -1.33848086 | -1.18258238 | 4.01938800  |
| C | -0.79863386 | -2.85439738 | 5.48231500  |
| H | 0.25921514  | -2.53724538 | 3.68681500  |
| C | 0.85601614  | -4.48984038 | 5.50867300  |
| C | 2.51022114  | -5.13456138 | 4.22730900  |
| C | 4.29352014  | -4.55980238 | 1.13783600  |
| C | 3.91110014  | -3.58911038 | 0.05137700  |
| C | 3.36177314  | -4.48006438 | 2.15118600  |
| C | 2.71733214  | -2.85146638 | 0.68035200  |
| H | 1.68744114  | -3.17402438 | 2.46240000  |
| N | 3.36891114  | -5.24138338 | 3.25185800  |
| N | 2.18018014  | -1.81768038 | 0.09608200  |
| N | -1.32726686 | -0.38139238 | 2.98797500  |
| N | -0.20967586 | -3.86652038 | 6.05844100  |
| N | -0.49640186 | -2.24438138 | 4.29306800  |
| N | 1.45435014  | -4.23407138 | 4.34357500  |
| N | 2.43761214  | -3.44975638 | 1.84003500  |
| N | 0.51769714  | -1.43563238 | 1.81230200  |
| N | 4.47382414  | 0.12240262  | 0.58043900  |
| N | 4.97998114  | -2.80392138 | -0.48717800 |
| C | 10.65888314 | -3.86019838 | 2.43838100  |
| C | 8.81367914  | -3.85843638 | 1.27849500  |
| C | 12.83446814 | -1.97640838 | 4.78510900  |
| C | 12.54368414 | -0.69045538 | 5.24780500  |
| C | 11.74529014 | -2.38798638 | 3.88175700  |
| C | 11.26491114 | -0.27210938 | 4.64306600  |
| H | 9.99892214  | -1.32175538 | 3.31139400  |
| C | 8.88973514  | 2.50116262  | 4.52022200  |
| C | 7.69896814  | 2.49715062  | 3.77484100  |
| C | 9.50769814  | 1.20775562  | 4.27272900  |
| C | 7.66297014  | 1.20284262  | 3.11862800  |
| C | 5.46558114  | -0.73528538 | 0.85065500  |
| C | 5.71941014  | -2.01147938 | 0.42106100  |
| C | 6.60055114  | -0.31351038 | 1.71989200  |
| C | 7.01269814  | -2.40797038 | 0.95682400  |
| H | 8.34004014  | -1.38713038 | 2.26695300  |
| N | 6.63083314  | 0.83547962  | 2.30353800  |
| N | 7.60825014  | -3.53889838 | 0.72930800  |
| N | 11.68608914 | -3.51982738 | 3.26758600  |
| N | 10.69412614 | 0.86798662  | 4.85263600  |

|   |             |             |             |
|---|-------------|-------------|-------------|
| N | 10.85362214 | -1.32451938 | 3.85027400  |
| N | 8.75345314  | 0.45742862  | 3.43293100  |
| N | 7.48052714  | -1.35766638 | 1.73780800  |
| N | 9.55801214  | -3.12186938 | 2.14045900  |
| N | 5.32133514  | -5.42037838 | 1.00047600  |
| H | 6.13410014  | -5.05834738 | 0.50134000  |
| H | 5.52660314  | -5.98398838 | 1.81651300  |
| H | 3.61648114  | -0.21732138 | 0.15822200  |
| H | 4.47590014  | 1.00383662  | 1.07586500  |
| H | 4.64864014  | -2.27598838 | -1.29203200 |
| O | 3.43844314  | -4.31899738 | -1.13534200 |
| O | 2.34855414  | -4.98574938 | -0.89824000 |
| C | 3.14552314  | -7.67121738 | 7.00656500  |
| C | 2.08298014  | -7.25919238 | 7.82550300  |
| C | 1.24350914  | -6.21266338 | 7.44408300  |
| C | 1.50461814  | -5.60041438 | 6.22443200  |
| C | 2.56095014  | -6.00829438 | 5.40981700  |
| C | 3.40059114  | -7.05056538 | 5.78345400  |
| H | 3.77941614  | -8.48927138 | 7.33414900  |
| H | 1.91502014  | -7.76600738 | 8.77048300  |
| H | 0.41823914  | -5.88341638 | 8.06691000  |
| H | 4.21998514  | -7.36467838 | 5.14519300  |
| C | -2.66375886 | -2.32449038 | 7.20962500  |
| C | -3.72246586 | -1.45786338 | 7.46323600  |
| C | -4.05149686 | -0.42836338 | 6.56336600  |
| C | -3.33291486 | -0.23761538 | 5.38774100  |
| C | -2.27346386 | -1.10665338 | 5.13486700  |
| H | -2.39733286 | -3.12311338 | 7.89386000  |
| H | -4.30687786 | -1.57520338 | 8.37001700  |
| H | -4.88402486 | 0.22863562  | 6.79400200  |
| H | -3.57849786 | 0.55286162  | 4.68659000  |
| C | 0.06158514  | 1.79828262  | -1.49909700 |
| C | 0.83394414  | 0.68008262  | -1.19137100 |
| C | -0.47011786 | 0.44482362  | 0.85489500  |
| C | -1.24521586 | 1.56039962  | 0.54769100  |
| C | -0.96311686 | 2.23187462  | -0.63994100 |
| H | 0.24760714  | 2.34274062  | -2.41934200 |
| H | 1.61622914  | 0.33032562  | -1.85855400 |
| H | -2.03779986 | 1.88699562  | 1.21306200  |
| H | -1.54664186 | 3.10545162  | -0.91299300 |
| C | 6.84116114  | 3.59472562  | 3.77834800  |
| C | 7.20950414  | 4.69660362  | 4.54816000  |
| C | 8.40104414  | 4.70009362  | 5.29350200  |
| C | 9.25854014  | 3.60084862  | 5.28993400  |



|   |             |             |             |
|---|-------------|-------------|-------------|
| H | 5.92152414  | 3.58790862  | 3.20230000  |
| H | 6.56584614  | 5.57010262  | 4.57531100  |
| H | 8.65460414  | 5.57626362  | 5.88168200  |
| H | 10.18005014 | 3.59446462  | 5.86297100  |
| C | 14.84052814 | -1.98145538 | 6.06197900  |
| C | 13.98289114 | -2.64498638 | 5.18042900  |
| C | 13.38921914 | -0.02559038 | 6.12202900  |
| C | 14.54895814 | -0.69318138 | 6.52533900  |
| H | 15.74960414 | -2.47202838 | 6.39454300  |
| H | 14.19652914 | -3.64324138 | 4.81327600  |
| H | 13.14928614 | 0.97280862  | 6.47220800  |
| H | 15.23653814 | -0.20644238 | 7.20936900  |
| C | 11.16737014 | -7.30248038 | 0.90807800  |
| C | 9.98393014  | -7.29853938 | 0.14869800  |
| C | 9.11156614  | -6.21216838 | 0.17765900  |
| C | 9.45341814  | -5.13261138 | 0.99000600  |
| C | 10.63913614 | -5.13484738 | 1.74356700  |
| C | 11.51285314 | -6.21969738 | 1.71381200  |
| H | 11.82332714 | -8.16587638 | 0.85985600  |
| H | 9.75062114  | -8.15650638 | -0.47364500 |
| H | 8.20597514  | -6.20221538 | -0.42177200 |
| H | 12.42676114 | -6.21351838 | 2.29894400  |

12-septet

SCF energy in solution: -3344.22868317

|   |             |             |             |
|---|-------------|-------------|-------------|
| C | 0.68492308  | 0.61969230  | 0.00000000  |
| C | -0.43685292 | 0.04320030  | 1.89888900  |
| C | 1.15557008  | -0.62611770 | 0.57471300  |
| C | -2.19836392 | -1.78168070 | 5.77147500  |
| C | -1.43370192 | -0.72130870 | 3.85386000  |
| C | -1.06234892 | -2.52617570 | 5.22383600  |
| H | 0.11699308  | -2.11397070 | 3.50262000  |
| C | 0.46890708  | -4.28069270 | 5.19645100  |
| C | 2.12988708  | -4.88781170 | 3.91601800  |
| C | 4.17013808  | -4.13189770 | 0.96607900  |
| C | 3.84819008  | -3.14177070 | -0.09131600 |
| C | 3.13214308  | -4.13931370 | 1.94867200  |
| C | 2.64869808  | -2.41147270 | 0.52824500  |
| H | 1.47492808  | -2.84188070 | 2.22761700  |
| N | 3.09841708  | -4.96753270 | 2.95136000  |
| N | 2.19477208  | -1.31676270 | 0.02246400  |
| N | -1.35699192 | 0.14978930  | 2.89567900  |
| N | -0.57072892 | -3.61657770 | 5.72794100  |

|   |             |             |             |
|---|-------------|-------------|-------------|
| N | -0.65766392 | -1.83152570 | 4.08773600  |
| N | 1.19039308  | -3.94843470 | 4.06159400  |
| N | 2.25116808  | -3.10692970 | 1.63270300  |
| N | 0.46877808  | -0.94413270 | 1.70514300  |
| N | 4.53498908  | 0.56119830  | 0.51123700  |
| N | 4.93560008  | -2.36053570 | -0.59719900 |
| C | 10.56382108 | -3.67478570 | 2.32842100  |
| C | 8.72043108  | -3.58925770 | 1.16890100  |
| C | 12.80427808 | -1.90544970 | 4.70251800  |
| C | 12.56183908 | -0.61497470 | 5.18022200  |
| C | 11.70289908 | -2.26318970 | 3.79117600  |
| C | 11.30259508 | -0.13980570 | 4.57706500  |
| H | 10.00088508 | -1.12375770 | 3.22917700  |
| C | 9.03777408  | 2.72502330  | 4.48024200  |
| C | 7.84878808  | 2.77589530  | 3.73392800  |
| C | 9.60457808  | 1.41082030  | 4.22014000  |
| C | 7.76280708  | 1.49064030  | 3.06424000  |
| C | 5.49423608  | -0.33559270 | 0.77371600  |
| C | 5.69843408  | -1.61536570 | 0.32894900  |
| C | 6.64419008  | 0.03301630  | 1.64689700  |
| C | 6.97492308  | -2.06712670 | 0.86162300  |
| H | 8.33924808  | -1.11467570 | 2.18505100  |
| N | 6.71787608  | 1.17256430  | 2.24487800  |
| N | 7.52600008  | -3.21969570 | 0.62563400  |
| N | 11.60176508 | -3.38479070 | 3.16308200  |
| N | 10.77540208 | 1.01877830  | 4.79862900  |
| N | 10.85347508 | -1.16591370 | 3.76977500  |
| N | 8.82263808  | 0.69946830  | 3.37186700  |
| N | 7.48453108  | -1.04421770 | 1.65179700  |
| N | 9.49044008  | -2.89250570 | 2.04089200  |
| N | 5.20014808  | -4.99054670 | 0.93946400  |
| H | 6.05422908  | -4.68244070 | 0.47125500  |
| H | 5.30153408  | -5.58148670 | 1.75704000  |
| H | 3.66341208  | 0.25148830  | 0.09552000  |
| H | 4.56514808  | 1.43472430  | 1.01965200  |
| H | 4.62663708  | -1.80536770 | -1.39201500 |
| O | 3.37939608  | -3.81760870 | -1.33494200 |
| O | 2.29781708  | -4.50605670 | -1.13950900 |
| C | 2.43552008  | -7.78597370 | 6.36756100  |
| C | 1.36697708  | -7.39084170 | 7.18922900  |
| C | 0.62656508  | -6.24185570 | 6.91397400  |
| C | 0.98640208  | -5.49936570 | 5.79180500  |
| C | 2.05428008  | -5.89488770 | 4.97296700  |
| C | 2.79434808  | -7.03946470 | 5.24437000  |

|   |             |             |             |
|---|-------------|-------------|-------------|
| H | 2.98847008  | -8.68696970 | 6.61313400  |
| H | 1.11506008  | -7.99482570 | 8.05533100  |
| H | -0.19993292 | -5.93173570 | 7.54510200  |
| H | 3.61776308  | -7.33584070 | 4.60262300  |
| C | -2.98760892 | -2.01615670 | 6.89026600  |
| C | -4.01675992 | -1.11047170 | 7.15227000  |
| C | -4.24598392 | -0.00792770 | 6.31821000  |
| C | -3.44996592 | 0.22240730  | 5.19405200  |
| C | -2.42798592 | -0.67996470 | 4.93964000  |
| H | -2.80193992 | -2.87383870 | 7.52808200  |
| H | -4.65381992 | -1.26157070 | 8.01786100  |
| H | -5.05586692 | 0.67559530  | 6.55129800  |
| H | -3.61469392 | 1.06994730  | 4.53699200  |
| C | 0.36157708  | 2.54485130  | -1.36754800 |
| C | 1.04735908  | 1.35582030  | -1.12786800 |
| C | -0.33973892 | 1.05648930  | 0.85580300  |
| C | -1.02772592 | 2.24182230  | 0.61462700  |
| C | -0.66112192 | 2.98283130  | -0.50806400 |
| H | 0.61517908  | 3.14324930  | -2.23683900 |
| H | 1.82532108  | 1.00746730  | -1.80112300 |
| H | -1.81926792 | 2.56910430  | 1.28099300  |
| H | -1.17505492 | 3.91290330  | -0.72869500 |
| C | 7.03517308  | 3.90645330  | 3.74827900  |
| C | 7.44624608  | 4.98475630  | 4.52997300  |
| C | 8.63622208  | 4.93322630  | 5.27604300  |
| C | 9.44937208  | 3.80091030  | 5.26163100  |
| H | 6.11662208  | 3.94213030  | 3.17155300  |
| H | 6.83769408  | 5.88273630  | 4.56604300  |
| H | 8.92364008  | 5.79258130  | 5.87338300  |
| H | 10.36932108 | 3.75169130  | 5.83511700  |
| C | 14.80351708 | -2.00396470 | 5.98628100  |
| C | 13.92436308 | -2.62286370 | 5.09348500  |
| C | 13.42897908 | 0.00581330  | 6.06572300  |
| C | 14.56024208 | -0.71114570 | 6.46476100  |
| H | 15.69151108 | -2.53350470 | 6.31601300  |
| H | 14.10049808 | -3.62414070 | 4.71485000  |
| H | 13.22654308 | 1.00832330  | 6.42765000  |
| H | 15.26338808 | -0.25996170 | 7.15727400  |
| C | 10.94698408 | -7.11067170 | 0.74721600  |
| C | 9.76537508  | -7.05177970 | -0.01285200 |
| C | 8.93352308  | -5.93476870 | 0.03224700  |
| C | 9.31345308  | -4.88137870 | 0.86195300  |
| C | 10.49778008 | -4.93807570 | 1.61558000  |
| C | 11.33118808 | -6.05361470 | 1.56946800  |

|   |             |             |             |
|---|-------------|-------------|-------------|
| H | 11.57098008 | -7.99661470 | 0.68598100  |
| H | 9.50197108  | -7.89072170 | -0.64894800 |
| H | 8.03070708  | -5.88185970 | -0.56928800 |
| H | 12.24433908 | -6.08965970 | 2.15471000  |

TS13s

SCF energy in solution: -3344.28721

Free energy in solution: -3343.560843

|   |              |             |             |
|---|--------------|-------------|-------------|
| C | 2.32558138   | 0.14211886  | 0.00000000  |
| C | 0.46482038   | -0.33104414 | 1.03401700  |
| C | 3.52179538   | -0.76102714 | -1.77797400 |
| C | 3.18444038   | -2.51779714 | -3.18348300 |
| H | 1.81872338   | -1.99119014 | -1.65334000 |
| C | 1.47459238   | -4.09042014 | -3.40449300 |
| C | -0.41384462  | -4.52996214 | -2.41464400 |
| C | -2.76483862  | -3.57834414 | 0.23717200  |
| C | -2.52092162  | -2.55647514 | 1.33347600  |
| C | -1.59858762  | -3.64697414 | -0.61570700 |
| C | -1.21224962  | -1.92627114 | 0.86544400  |
| H | 0.11535638   | -2.41704814 | -0.67145600 |
| N | -1.46989862  | -4.49678614 | -1.59224300 |
| N | -0.68789362  | -0.87599614 | 1.43403800  |
| N | 3.36399138   | 0.13553886  | -0.81689300 |
| N | 2.64187738   | -3.55360814 | -3.76717100 |
| N | 2.69405038   | -1.78701914 | -2.12036800 |
| N | 0.65647338   | -3.69693214 | -2.39107300 |
| N | -0.75793262  | -2.63000214 | -0.19450100 |
| N | 1.26880838   | -0.72915714 | 0.02575900  |
| N | -3.23165762  | 0.79408086  | 0.22182800  |
| N | -3.58074262  | -1.76817314 | 1.79682800  |
| C | -9.16136562  | -4.86181414 | 0.47868500  |
| C | -7.89735762  | -4.69111914 | 1.04990500  |
| C | -9.40469662  | -3.64313714 | -0.30746900 |
| C | -7.42856362  | -3.38104214 | 0.58001200  |
| C | -12.00713462 | -2.16682014 | -2.46558700 |
| C | -11.87869862 | -0.92144514 | -3.09972400 |
| C | -10.78429562 | -2.40429914 | -1.71143800 |
| C | -10.57441662 | -0.37932214 | -2.74401100 |
| H | -9.06388262  | -1.20069914 | -1.51212800 |
| C | -8.88763462  | 1.23012686  | -2.80956600 |
| C | -6.89429162  | 1.47239286  | -1.95219900 |
| C | -4.32593262  | -0.02103214 | 0.20967700  |
| C | -4.46885862  | -1.22583014 | 0.87794100  |

|   |              |             |             |
|---|--------------|-------------|-------------|
| C | -5.53662962  | 0.21828886  | -0.54423100 |
| C | -5.76332462  | -1.74251614 | 0.52276000  |
| H | -7.29345862  | -0.94892014 | -0.71314000 |
| N | -5.76076962  | 1.28447286  | -1.28158200 |
| N | -6.23868762  | -2.91467214 | 0.92697200  |
| N | -10.54002662 | -3.47449814 | -0.99156300 |
| N | -10.09677762 | 0.76676186  | -3.15330700 |
| N | -9.98459962  | -1.31044314 | -1.91897500 |
| N | -7.97325662  | 0.63760586  | -2.01110200 |
| N | -6.37431462  | -0.84502214 | -0.31162400 |
| N | -8.35977962  | -2.79078814 | -0.22320300 |
| N | -3.79939962  | -4.34436214 | 0.17569600  |
| H | -4.60114262  | -4.15789514 | 0.79367200  |
| H | -3.81528662  | -5.11486414 | -0.48596800 |
| H | -2.61644962  | 0.66411686  | 1.01929900  |
| H | -3.38436762  | 1.74655486  | -0.07943600 |
| H | -3.90497062  | -2.67990614 | 2.60650700  |
| O | -2.18347262  | -3.45102514 | 2.42425700  |
| O | -3.43884462  | -3.78307914 | 2.99722800  |
| C | -13.15793562 | -2.94086814 | -2.61351800 |
| C | -12.89799062 | -0.41106214 | -3.90338300 |
| C | -14.04407862 | -1.18216014 | -4.05071800 |
| C | -14.17289362 | -2.43186614 | -3.41357900 |
| H | -13.24407962 | -3.90135214 | -2.11658600 |
| H | -12.78731662 | 0.55284086  | -4.38865500 |
| H | -14.85916362 | -0.81789414 | -4.66782400 |
| H | -15.08429862 | -3.00428214 | -3.55288200 |
| C | -8.40069562  | 2.52010186  | -3.30678300 |
| C | -7.12286762  | 2.67396186  | -2.75902800 |
| C | -6.35174862  | 3.80149386  | -3.02680300 |
| C | -6.90298162  | 4.77199286  | -3.86035000 |
| C | -8.18757862  | 4.61740786  | -4.40920000 |
| C | -8.95566062  | 3.48686586  | -4.13996200 |
| H | -5.36019062  | 3.91309186  | -2.60030000 |
| H | -6.33264862  | 5.66580286  | -4.09309300 |
| H | -8.58434662  | 5.39506586  | -5.05423200 |
| H | -9.94819562  | 3.35698686  | -4.55900100 |
| C | -8.08750062  | -6.80271714 | 2.12418700  |
| C | -7.33811762  | -5.65006014 | 1.88823000  |
| C | -9.91247662  | -6.00786014 | 0.71344300  |
| C | -9.35374962  | -6.97961414 | 1.54368200  |
| H | -7.69018162  | -7.57526214 | 2.77481300  |
| H | -6.36825262  | -5.49627914 | 2.35446900  |
| H | -10.89415562 | -6.13244814 | 0.26815300  |

|   |             |             |             |
|---|-------------|-------------|-------------|
| H | -9.90875262 | -7.88852414 | 1.75343500  |
| C | -1.11774462 | -6.56271114 | -3.91233100 |
| C | -0.67631062 | -7.31636914 | -4.99564200 |
| C | 0.54565438  | -7.03324614 | -5.63229200 |
| C | 1.35821138  | -5.98834114 | -5.20265600 |
| C | 0.91347438  | -5.23600814 | -4.11814500 |
| C | -0.30203462 | -5.51698514 | -3.48437600 |
| H | -2.05937662 | -6.77764014 | -3.41784200 |
| H | -1.28351362 | -8.13926014 | -5.35911300 |
| H | 0.85648438  | -7.64377214 | -6.47407400 |
| H | 2.30223038  | -5.76194214 | -5.68731400 |
| C | 5.37263538  | -2.21697214 | -4.54641100 |
| C | 6.50331738  | -1.41773214 | -4.64416800 |
| C | 6.71131938  | -0.32813614 | -3.77356500 |
| C | 5.79218938  | -0.01204314 | -2.78330300 |
| C | 4.65398838  | -0.81510814 | -2.68348900 |
| C | 4.44679538  | -1.90115514 | -3.55102200 |
| H | 5.20376838  | -3.05721314 | -5.21133200 |
| H | 7.24611138  | -1.63246914 | -5.40567100 |
| H | 7.60896438  | 0.27142886  | -3.88377800 |
| H | 5.94000338  | 0.82288486  | -2.10671000 |
| C | 1.32780238  | 2.69706886  | 3.17754500  |
| C | 2.52111338  | 3.00863686  | 2.51039400  |
| C | 2.97371938  | 2.24182986  | 1.43390900  |
| C | 2.18916638  | 1.16211686  | 1.05238300  |
| C | 0.99993038  | 0.85670186  | 1.71471700  |
| C | 0.54414138  | 1.60813786  | 2.78893200  |
| H | 1.01203138  | 3.31298486  | 4.01336100  |
| H | 3.10462138  | 3.86162686  | 2.84174000  |
| H | 3.89811238  | 2.47386886  | 0.91539000  |
| H | -0.37560062 | 1.34837286  | 3.30355700  |

TS13t

SCF energy in solution: -3344.248697

Free energy in solution: -3343.527196

|   |             |             |             |
|---|-------------|-------------|-------------|
| C | 2.19619421  | 0.19379845  | 0.02874965  |
| C | 0.33541821  | -0.27940555 | 1.06272265  |
| C | 3.39238221  | -0.70919955 | -1.74931435 |
| C | 3.05500421  | -2.46585255 | -3.15496935 |
| H | 1.68927921  | -1.93933355 | -1.62480135 |
| C | 1.34513521  | -4.03843655 | -3.37609135 |
| C | -0.54331779 | -4.47802855 | -2.38629535 |
| C | -2.89429579 | -3.52658655 | 0.26558965  |

|   |              |             |             |
|---|--------------|-------------|-------------|
| C | -2.65038979  | -2.50477255 | 1.36195165  |
| C | -1.72805979  | -3.59515655 | -0.58729635 |
| C | -1.34169379  | -1.87456855 | 0.89397765  |
| H | -0.01410379  | -2.36523655 | -0.64296235 |
| N | -1.59936279  | -4.44490055 | -1.56389735 |
| N | -0.81730979  | -0.82435455 | 1.46267465  |
| N | 3.23460721   | 0.18727745  | -0.78815235 |
| N | 2.51243521   | -3.50160555 | -3.73873735 |
| N | 2.56461121   | -1.73513555 | -2.09181035 |
| N | 0.52703921   | -3.64503155 | -2.36263835 |
| N | -0.88740679  | -2.57820055 | -0.16603435 |
| N | 1.13941121   | -0.67745255 | 0.05442865  |
| N | -3.36102679  | 0.84577645  | 0.25030765  |
| N | -3.71020179  | -1.71649055 | 1.82532265  |
| C | -9.29096379  | -4.80990855 | 0.50731165  |
| C | -8.02695279  | -4.63925055 | 1.07852965  |
| C | -9.53424879  | -3.59123455 | -0.27885935 |
| C | -7.55810379  | -3.32920455 | 0.60861165  |
| C | -12.13664779 | -2.11485855 | -2.43699635 |
| C | -12.00817979 | -0.86948655 | -3.07113135 |
| C | -10.91382079 | -2.35236055 | -1.68283335 |
| C | -10.70389079 | -0.32738855 | -2.71540635 |
| H | -9.19340279  | -1.14878255 | -1.48347035 |
| C | -9.01706979  | 1.28201045  | -2.78096935 |
| C | -7.02371179  | 1.52420745  | -1.92361735 |
| C | -4.45536179  | 0.03069345  | 0.23820765  |
| C | -4.59830479  | -1.17410155 | 0.90645465  |
| C | -5.66605479  | 0.27004645  | -0.51568535 |
| C | -5.89279879  | -1.69076155 | 0.55129165  |
| H | -7.42291779  | -0.89710455 | -0.68459035 |
| N | -5.89019079  | 1.33625145  | -1.25301435 |
| N | -6.36819879  | -2.86288355 | 0.95554065  |
| N | -10.66957679 | -3.42255955 | -0.96295535 |
| N | -10.22622679 | 0.81868345  | -3.12470435 |
| N | -10.11410279 | -1.25851455 | -1.89036135 |
| N | -8.10270179  | 0.68945245  | -1.98252435 |
| N | -6.50376779  | -0.79324455 | -0.28307535 |
| N | -8.48929779  | -2.73892555 | -0.19461035 |
| N | -3.92884779  | -4.29262555 | 0.20412265  |
| H | -4.73052579  | -4.10624055 | 0.82219565  |
| H | -3.94473979  | -5.06313355 | -0.45753135 |
| H | -2.74592379  | 0.71584145  | 1.04787065  |
| H | -3.51384679  | 1.79830845  | -0.05074135 |
| H | -4.03441879  | -2.62821655 | 2.63500565  |

|   |              |             |             |
|---|--------------|-------------|-------------|
| O | -2.31295779  | -3.39939555 | 2.45269865  |
| O | -3.56832379  | -3.73142855 | 3.02564865  |
| C | -13.28746079 | -2.88888455 | -2.58494535 |
| C | -13.02744879 | -0.35908255 | -3.87480635 |
| C | -14.17354879 | -1.13015855 | -4.02215835 |
| C | -14.30239679 | -2.37986155 | -3.38502135 |
| H | -13.37363079 | -3.84936755 | -2.08801535 |
| H | -12.91674679 | 0.60481745  | -4.36007835 |
| H | -14.98861779 | -0.76587755 | -4.63927735 |
| H | -15.21381079 | -2.95226155 | -3.52433935 |
| C | -8.53009679  | 2.57197745  | -3.27817735 |
| C | -7.25225879  | 2.72579345  | -2.73043335 |
| C | -6.48110779  | 3.85330345  | -2.99820735 |
| C | -7.03232079  | 4.82382445  | -3.83174235 |
| C | -8.31692679  | 4.66928245  | -4.38058235 |
| C | -9.08504179  | 3.53876045  | -4.11134635 |
| H | -5.48954179  | 3.96486745  | -2.57171435 |
| H | -6.46196379  | 5.71761945  | -4.06448535 |
| H | -8.71367579  | 5.44695745  | -5.02560635 |
| H | -10.07758379 | 3.40891345  | -4.53037535 |
| C | -8.21718179  | -6.75080955 | 2.15288365  |
| C | -7.46775079  | -5.59819155 | 1.91689965  |
| C | -10.04212079 | -5.95592055 | 0.74210365  |
| C | -9.48343479  | -6.92767155 | 1.57237165  |
| H | -7.81990379  | -7.52335355 | 2.80353565  |
| H | -6.49788679  | -5.44442255 | 2.38314265  |
| H | -11.02380479 | -6.08048455 | 0.29681665  |
| H | -10.03847279 | -7.83655655 | 1.78214365  |
| C | -1.24725579  | -6.51061455 | -3.88418935 |
| C | -0.80583079  | -7.26417355 | -4.96757235 |
| C | 0.41614821   | -6.98102055 | -5.60418335 |
| C | 1.22872921   | -5.93618255 | -5.17443435 |
| C | 0.78400221   | -5.18394955 | -4.08984935 |
| C | -0.43151979  | -5.46495655 | -3.45611535 |
| H | -2.18890079  | -6.72556655 | -3.38973435 |
| H | -1.41305379  | -8.08700955 | -5.33113435 |
| H | 0.72696621   | -7.59146855 | -6.44602735 |
| H | 2.17275621   | -5.70975355 | -5.65906035 |
| C | 5.24321821   | -2.16496255 | -4.51785335 |
| C | 6.37391821   | -1.36573555 | -4.61553935 |
| C | 6.58193121   | -0.27621155 | -3.74485235 |
| C | 5.66279721   | 0.03982245  | -2.75457235 |
| C | 4.52458321   | -0.76322855 | -2.65483035 |
| C | 4.31737821   | -1.84920255 | -3.52244835 |



|   |             |             |             |
|---|-------------|-------------|-------------|
| H | 5.07433821  | -3.00514855 | -5.18283935 |
| H | 7.11671421  | -1.58042655 | -5.37705235 |
| H | 7.47958621  | 0.32334745  | -3.85501135 |
| H | 5.81062121  | 0.87469845  | -2.07791735 |
| C | 1.19849821  | 2.74846745  | 3.20654765  |
| C | 2.39181721  | 3.06006545  | 2.53942465  |
| C | 2.84440121  | 2.29334945  | 1.46286465  |
| C | 2.05981821  | 1.21369545  | 1.08123665  |
| C | 0.87057321  | 0.90825345  | 1.74354165  |
| C | 0.41480421  | 1.65959645  | 2.81782765  |
| H | 0.88275021  | 3.36430845  | 4.04242565  |
| H | 2.97535021  | 3.91300745  | 2.87085065  |
| H | 3.76879921  | 2.52541645  | 0.94436665  |
| H | -0.50494179 | 1.39980245  | 3.33242965  |

14

SCF energy in solution: -3344.289103

Free energy in solution: -3343.560262

|   |              |             |             |
|---|--------------|-------------|-------------|
| C | -1.43410857  | 1.43410851  | 0.00000000  |
| C | -3.16873057  | 0.74471551  | 1.12744900  |
| C | -0.47603657  | 0.96690151  | -2.06006300 |
| C | -1.01622157  | -0.43193949 | -3.77824300 |
| H | -2.16962857  | -0.28243449 | -2.00233100 |
| C | -2.76841657  | -1.93555349 | -4.11036600 |
| C | -4.51302457  | -2.63858049 | -3.01120400 |
| C | -6.43913057  | -2.40272949 | 0.07582100  |
| C | -6.15534457  | -1.52494649 | 1.29290900  |
| C | -5.44155257  | -2.21931549 | -0.90963600 |
| C | -4.88904857  | -0.78109349 | 0.79853900  |
| H | -3.75642457  | -0.92741449 | -0.93637000 |
| N | -5.42661457  | -2.82110949 | -2.07942100 |
| N | -4.26615257  | 0.13669551  | 1.52304700  |
| N | -0.48765657  | 1.62478851  | -0.92196600 |
| N | -1.63387557  | -1.30647049 | -4.50339500 |
| N | -1.35655857  | 0.03534351  | -2.51728600 |
| N | -3.42007257  | -1.79802449 | -2.94798600 |
| N | -4.56001657  | -1.25116349 | -0.40272600 |
| N | -2.47720057  | 0.57792951  | -0.04287800 |
| N | -6.55310557  | 1.92396851  | 0.52967500  |
| N | -7.26682057  | -0.84138649 | 1.76354200  |
| C | -13.04738557 | -3.05568849 | -0.15070600 |
| C | -11.80727257 | -3.10150449 | 0.49373000  |

|   |              |             |             |
|---|--------------|-------------|-------------|
| C | -13.11932557 | -1.72707149 | -0.76928300 |
| C | -11.17908357 | -1.80064349 | 0.23230500  |
| C | -15.44436157 | 0.29492251  | -2.79960100 |
| C | -15.16139757 | 1.59683251  | -3.24311900 |
| C | -14.29307357 | -0.17083549 | -2.04233000 |
| C | -13.83196057 | 1.94385351  | -2.76508500 |
| H | -12.47208057 | 0.81039451  | -1.61417500 |
| C | -11.99613957 | 3.35814751  | -2.53179600 |
| C | -10.03584457 | 3.25411551  | -1.57416400 |
| C | -7.72450457  | 1.21144751  | 0.40843100  |
| C | -8.00329557  | -0.04792749 | 0.92525400  |
| C | -8.87801357  | 1.67494451  | -0.31734300 |
| C | -9.35277657  | -0.36664349 | 0.47515500  |
| H | -10.74651257 | 0.74164251  | -0.67608400 |
| N | -8.95929957  | 2.85125151  | -0.90575400 |
| N | -9.96495157  | -1.51802149 | 0.69472100  |
| N | -14.19111457 | -1.34670949 | -1.46957200 |
| N | -13.22241857 | 3.08332551  | -2.98637000 |
| N | -13.37911557 | 0.85349451  | -2.06291000 |
| N | -11.18960357 | 2.56173151  | -1.79311600 |
| N | -9.83755457  | 0.69528751  | -0.24220200 |
| N | -11.99655057 | -1.01338049 | -0.52151000 |
| N | -7.53847657  | -3.08958849 | 0.00569400  |
| H | -8.25367257  | -2.90472149 | 0.72074600  |
| H | -7.78208557  | -3.58772749 | -0.84227900 |
| H | -6.03989257  | 1.71961151  | 1.38202000  |
| H | -6.65189057  | 2.91085251  | 0.32599100  |
| H | -6.52876457  | -1.30373449 | 3.49156000  |
| O | -5.71417457  | -2.46600249 | 2.28626400  |
| O | -5.67705657  | -1.79825549 | 3.53990100  |
| C | -16.65800857 | -0.32474249 | -3.10107600 |
| C | -16.08344757 | 2.31860751  | -4.00251400 |
| C | -17.29025957 | 1.70097551  | -4.30214500 |
| C | -17.57431857 | 0.39426851  | -3.85655800 |
| H | -16.86459657 | -1.33068249 | -2.75124000 |
| H | -15.85298157 | 3.32392351  | -4.33895500 |
| H | -18.03257557 | 2.23117051  | -4.89018800 |
| H | -18.52931557 | -0.05427849 | -4.11092000 |
| C | -11.35204357 | 4.64545851  | -2.81512600 |
| C | -10.09647057 | 4.57781851  | -2.20378500 |
| C | -9.19943057  | 5.63933151  | -2.27281900 |
| C | -9.60169057  | 6.77440251  | -2.97386600 |
| C | -10.86400557 | 6.84217751  | -3.58729000 |
| C | -11.75847357 | 5.77599851  | -3.51693300 |

|   |              |             |             |
|---|--------------|-------------|-------------|
| H | -8.22595857  | 5.57795351  | -1.79717200 |
| H | -8.93029457  | 7.62404251  | -3.05001600 |
| H | -11.14348457 | 7.74289551  | -4.12486800 |
| H | -12.73539257 | 5.81714051  | -3.98766300 |
| C | -12.27950157 | -5.30987049 | 1.24796400  |
| C | -11.40474157 | -4.22549649 | 1.20964900  |
| C | -13.92520557 | -4.13453249 | -0.11378900 |
| C | -13.52176757 | -5.26575349 | 0.59308300  |
| H | -12.00213657 | -6.20337849 | 1.79842100  |
| H | -10.45332957 | -4.24742249 | 1.73296200  |
| H | -14.88578957 | -4.08703549 | -0.61647500 |
| H | -14.17865557 | -6.12825749 | 0.64641200  |
| C | -5.42016557  | -4.28101249 | -4.84104300 |
| C | -5.13159657  | -4.74970849 | -6.11933300 |
| C | -4.00412157  | -4.29658249 | -6.82765500 |
| C | -3.13488957  | -3.36110749 | -6.27476300 |
| C | -3.42743757  | -2.89477749 | -4.99507700 |
| C | -4.54832357  | -3.34464949 | -4.28992500 |
| H | -6.28913457  | -4.62797149 | -4.29169900 |
| H | -5.78806957  | -5.47939249 | -6.58271000 |
| H | -3.81316657  | -4.68566149 | -7.82263300 |
| H | -2.26244757  | -3.00397749 | -6.81203700 |
| C | 0.99236543   | 0.20646351  | -5.30048400 |
| C | 2.11735743   | 1.02530151  | -5.35470400 |
| C | 2.44847743   | 1.88696051  | -4.29480700 |
| C | 1.66245643   | 1.95426351  | -3.14833300 |
| C | 0.53917243   | 1.13410851  | -3.09751700 |
| C | 0.20862343   | 0.27520851  | -4.15342500 |
| H | 0.72810543   | -0.46157249 | -6.11316800 |
| H | 2.75423343   | 1.00031351  | -6.23300100 |
| H | 3.33359643   | 2.50923551  | -4.37566000 |
| H | 1.90426443   | 2.61423951  | -2.32212200 |
| C | -1.98619657  | 3.25946051  | 3.73837700  |
| C | -0.87538957  | 3.70869051  | 3.01340800  |
| C | -0.57140757  | 3.18630551  | 1.75209400  |
| C | -1.42020957  | 2.20960551  | 1.25480600  |
| C | -2.52715357  | 1.76623851  | 1.97561600  |
| C | -2.83589357  | 2.27228751  | 3.22827800  |
| H | -2.18742257  | 3.68487751  | 4.71622900  |
| H | -0.23825657  | 4.47528651  | 3.44245300  |
| H | 0.28865743   | 3.52534651  | 1.18428400  |
| H | -3.69397757  | 1.90679751  | 3.78334900  |

SCF energy in solution: -3871.138633

Free energy in solution: -3870.380522

|   |              |             |            |
|---|--------------|-------------|------------|
| C | -2.72609825  | 0.68475451  | 0.00000000 |
| C | -4.83892725  | 1.19075151  | 0.19137500 |
| C | -1.21474625  | -0.61925249 | 1.20900100 |
| C | -1.34604825  | -1.79824949 | 3.14297500 |
| H | -2.97374125  | -0.70477749 | 2.37171800 |
| C | -3.03435425  | -2.14805449 | 4.71500700 |
| C | -5.12230325  | -1.54246349 | 4.91160800 |
| C | -8.09032525  | 0.11324251  | 3.40274800 |
| C | -8.04281225  | 0.74396851  | 2.05202900 |
| C | -6.70103725  | -0.41543349 | 3.62792800 |
| C | -6.61132825  | 0.64244251  | 1.60378800 |
| H | -4.97057225  | -0.36528649 | 2.42967600 |
| N | -6.36482725  | -1.02463149 | 4.71344600 |
| N | -6.14422825  | 1.27641451  | 0.57627000 |
| N | -1.53572725  | 0.17527951  | 0.19026700 |
| N | -1.81167825  | -2.31431849 | 4.27945000 |
| N | -2.01165125  | -0.99865549 | 2.25524500 |
| N | -4.07372725  | -1.46338049 | 4.09582200 |
| N | -5.95684325  | -0.13396049 | 2.51231700 |
| N | -3.87418725  | 0.47087951  | 0.75546100 |
| N | -9.58735225  | -3.11753549 | 1.28370800 |
| N | -8.64106225  | -0.58773349 | 2.20594200 |
| C | -13.99821525 | 3.35622251  | 3.72087200 |
| C | -12.63307125 | 3.09907551  | 3.57432500 |
| C | -14.68569225 | 2.14225251  | 3.26523000 |
| C | -12.55631725 | 1.72633951  | 3.03248300 |
| C | -18.14645825 | 0.92563051  | 2.85646300 |
| C | -18.47575725 | -0.34269549 | 2.35791800 |
| C | -16.69124825 | 1.02696851  | 2.87379300 |
| C | -17.22649725 | -1.03606949 | 2.06433000 |
| H | -15.22994625 | -0.38810249 | 2.29683900 |
| C | -15.94497325 | -2.83308949 | 1.33203800 |
| C | -13.82232825 | -3.28289149 | 1.13441700 |
| C | -10.39505625 | -2.08718249 | 1.60458900 |
| C | -10.02294125 | -0.83081349 | 2.06591000 |
| C | -11.83284825 | -2.14901449 | 1.56689900 |
| C | -11.24167725 | -0.10378749 | 2.32402900 |
| H | -13.25813425 | -0.66705149 | 2.09334800 |
| N | -12.50018425 | -3.20687149 | 1.15939200 |
| N | -11.39588425 | 1.14669651  | 2.77323400 |
| N | -16.02139725 | 2.07935651  | 3.27433000 |

|   |              |             |             |
|---|--------------|-------------|-------------|
| N | -17.12636125 | -2.24231149 | 1.58259800  |
| N | -16.21286525 | -0.16233649 | 2.39704600  |
| N | -14.71354125 | -2.31918549 | 1.51973100  |
| N | -12.28652025 | -0.93536249 | 2.01437000  |
| N | -13.80791725 | 1.19761051  | 2.87102000  |
| N | -8.90854225  | 0.50183851  | 4.47640100  |
| H | -8.70506725  | 1.46206651  | 4.74152700  |
| H | -8.72856225  | -0.11126849 | 5.26760200  |
| H | -8.59961825  | -2.93284749 | 1.19470000  |
| H | -9.99165425  | -3.91400549 | 0.81579200  |
| H | -10.12299525 | 2.13814351  | 2.78880800  |
| O | -8.76351525  | 1.79566951  | 1.55712500  |
| O | -9.24905425  | 2.62569451  | 2.61086800  |
| C | -19.13147325 | 1.83711251  | 3.23151100  |
| C | -19.80302425 | -0.74277049 | 2.21801000  |
| C | -20.78689525 | 0.16544451  | 2.59253200  |
| C | -20.45604725 | 1.43871951  | 3.09272700  |
| H | -18.86198725 | 2.81547551  | 3.61484000  |
| H | -20.04598925 | -1.72654049 | 1.83087900  |
| H | -21.83259525 | -0.10918149 | 2.49856800  |
| H | -21.25299025 | 2.11941751  | 3.37386000  |
| C | -15.88259825 | -4.19453849 | 0.79561500  |
| C | -14.52022825 | -4.48351749 | 0.66962300  |
| C | -14.08401125 | -5.71338449 | 0.18485500  |
| C | -15.05757925 | -6.64382249 | -0.17094400 |
| C | -16.42669125 | -6.35205149 | -0.04457400 |
| C | -16.85947125 | -5.12088349 | 0.44207000  |
| H | -13.02567825 | -5.93356049 | 0.09052800  |
| H | -14.75707125 | -7.61428149 | -0.55319100 |
| H | -17.15621225 | -7.10250649 | -0.33211000 |
| H | -17.91371625 | -4.88522349 | 0.54455600  |
| C | -12.15673425 | 5.26828151  | 4.43961100  |
| C | -11.68707525 | 4.05382451  | 3.93798500  |
| C | -14.47364325 | 4.56164351  | 4.22034800  |
| C | -13.52814825 | 5.52181351  | 4.57884500  |
| H | -11.44076425 | 6.03217151  | 4.72564500  |
| H | -10.62013825 | 3.89020151  | 3.83876300  |
| H | -15.53926125 | 4.73721451  | 4.32456100  |
| H | -13.85452125 | 6.47894251  | 4.97269400  |
| C | -5.57666725  | -2.63775749 | 7.24729800  |
| C | -4.94870125  | -3.38996649 | 8.23891300  |
| C | -3.60764925  | -3.78589749 | 8.10928900  |
| C | -2.85478725  | -3.44186249 | 6.98704000  |
| C | -3.48587425  | -2.69232949 | 6.00072500  |

|   |             |             |             |
|---|-------------|-------------|-------------|
| C | -4.81995325 | -2.29769549 | 6.13117000  |
| H | -6.61240825 | -2.32685249 | 7.33669800  |
| H | -5.50221025 | -3.67623749 | 9.12747300  |
| H | -3.15097125 | -4.37128649 | 8.90114700  |
| H | -1.81787925 | -3.74315449 | 6.88010800  |
| C | 1.09168075  | -2.67609949 | 3.11855400  |
| C | 2.25957175  | -2.63153549 | 2.38103700  |
| C | 2.34244975  | -1.89352649 | 1.17444000  |
| C | 1.25882775  | -1.18851049 | 0.68571200  |
| C | 0.06852175  | -1.22772949 | 1.42746800  |
| C | -0.01401525 | -1.96370549 | 2.63030000  |
| H | 1.01820775  | -3.23749349 | 4.04398500  |
| H | 3.13510875  | -3.17063349 | 2.72853400  |
| H | 3.27960275  | -1.88485649 | 0.62706000  |
| H | 1.31288175  | -0.62011249 | -0.23676700 |
| C | -4.21870825 | 3.33206851  | -2.89698400 |
| C | -2.85868325 | 3.00451051  | -3.02172700 |
| C | -2.23629625 | 2.13426651  | -2.12763400 |
| C | -3.01555725 | 1.60436551  | -1.10510200 |
| C | -4.36828325 | 1.93371251  | -0.98018800 |
| C | -4.99708925 | 2.79752251  | -1.87180300 |
| H | -4.66851025 | 4.01204751  | -3.61316400 |
| H | -2.28355125 | 3.43896451  | -3.83332700 |
| H | -1.18643825 | 1.87572251  | -2.21883000 |
| H | -6.05114825 | 3.03928051  | -1.77466000 |
| C | -7.54181725 | 4.94228151  | 3.51156600  |
| C | -6.91673025 | 3.76201251  | 2.73919300  |
| O | -6.46352525 | 2.81412051  | 3.32943100  |
| O | -6.92874525 | 3.97268851  | 1.44217300  |
| H | -6.67007625 | 3.14591551  | 0.97135200  |
| F | -8.47425225 | 5.58347251  | 2.81093500  |
| F | -8.09659325 | 4.50324651  | 4.64492600  |
| F | -6.58296825 | 5.82283651  | 3.83484500  |

TS16

SCF energy in solution: -3871.124066

Free energy in solution: -3870.362553

|   |             |             |             |
|---|-------------|-------------|-------------|
| C | -3.21705433 | -2.05426354 | 0.00000000  |
| C | -5.37942133 | -1.94278354 | 0.26867200  |
| C | -1.56202533 | -0.69413654 | -0.89286500 |
| C | -1.56263633 | 1.36732646  | -1.86930000 |
| H | -3.32652733 | 0.42192746  | -1.16507500 |
| C | -3.25511233 | 2.89973946  | -2.34577900 |

|   |              |             |             |
|---|--------------|-------------|-------------|
| C | -5.41585333  | 3.03264146  | -2.09944900 |
| C | -8.43351533  | 1.36338546  | -0.91716700 |
| C | -8.49486333  | 0.00394846  | -0.25892000 |
| C | -7.06852133  | 1.64777646  | -1.21116300 |
| C | -7.04888233  | -0.42288954 | -0.24015400 |
| H | -5.31579733  | 0.49240546  | -0.93209500 |
| N | -6.66871933  | 2.75807846  | -1.79176300 |
| N | -6.64094633  | -1.56729754 | 0.27435900  |
| N | -1.94045033  | -1.80688154 | -0.30619700 |
| N | -1.96083033  | 2.50288646  | -2.34691600 |
| N | -2.32190733  | 0.36703146  | -1.28381000 |
| N | -4.31750333  | 2.23033446  | -1.87546300 |
| N | -6.32219933  | 0.54707246  | -0.80109900 |
| N | -4.29189633  | -1.26748154 | -0.22167800 |
| N | -10.27556533 | 2.30383446  | 1.97372800  |
| N | -9.23960333  | -0.36173254 | 0.75410500  |
| C | -13.77844533 | -3.73404854 | -2.32774700 |
| C | -12.54231133 | -3.55241554 | -1.70466600 |
| C | -14.57299233 | -2.54788854 | -1.98364000 |
| C | -12.64205033 | -2.25919054 | -1.01286100 |
| C | -17.95773533 | -1.19970754 | -2.56549100 |
| C | -18.42824633 | -0.00350954 | -2.00892400 |
| C | -16.57260933 | -1.37272054 | -2.13492800 |
| C | -17.33833133 | 0.57780446  | -1.22877000 |
| H | -15.35609433 | -0.11106554 | -0.95633500 |
| C | -16.39704533 | 2.17033346  | 0.18610600  |
| C | -14.46166033 | 2.49651246  | 1.13900000  |
| C | -11.01301633 | 1.30017446  | 1.37871400  |
| C | -10.54055433 | 0.13682546  | 0.79256200  |
| C | -12.43000733 | 1.36585946  | 1.14488300  |
| C | -11.68196733 | -0.55014654 | 0.25433700  |
| H | -13.71521733 | 0.01867546  | 0.13529700  |
| N | -13.19273733 | 2.38734746  | 1.49527000  |
| N | -11.62158333 | -1.72401654 | -0.37378600 |
| N | -15.82819833 | -2.40473854 | -2.43432700 |
| N | -17.41836133 | 1.68309346  | -0.54408800 |
| N | -16.26898133 | -0.28129754 | -1.36239400 |
| N | -15.17716333 | 1.63465446  | 0.34660700  |
| N | -12.78765433 | 0.21763746  | 0.48038400  |
| N | -13.88195233 | -1.70066454 | -1.20065300 |
| N | -9.42001333  | 2.15947646  | -1.21101000 |
| H | -10.38601633 | 1.87063446  | -1.08721000 |
| H | -9.21093133  | 3.04159646  | -1.66693100 |
| H | -9.44605533  | 1.97291546  | 2.45133800  |

|   |              |             |             |
|---|--------------|-------------|-------------|
| H | -10.83544633 | 2.93777846  | 2.53100100  |
| H | -9.84745933  | -2.16509454 | -0.96972700 |
| O | -8.93604133  | -0.77010654 | -1.84180000 |
| O | -9.06644233  | -2.14550754 | -1.56888500 |
| C | -18.77202233 | -1.99979454 | -3.36321800 |
| C | -19.73158533 | 0.43427346  | -2.23068500 |
| C | -20.54575433 | -0.36109554 | -3.03022900 |
| C | -20.07250533 | -1.56215854 | -3.58949600 |
| H | -18.39279333 | -2.92386454 | -3.78638300 |
| H | -20.08513733 | 1.36137646  | -1.79215600 |
| H | -21.56713333 | -0.05242254 | -3.22871500 |
| H | -20.73794033 | -2.15553554 | -4.20822900 |
| C | -16.52863033 | 3.43454746  | 0.91769100  |
| C | -15.28669233 | 3.64425546  | 1.52653300  |
| C | -15.04655833 | 4.77122546  | 2.30721100  |
| C | -16.09084233 | 5.68064346  | 2.46059300  |
| C | -17.33796633 | 5.46906946  | 1.84844100  |
| C | -17.57380333 | 4.34140046  | 1.06512000  |
| H | -14.08080133 | 4.92950846  | 2.77623000  |
| H | -15.94210833 | 6.57115046  | 3.06341500  |
| H | -18.12819033 | 6.19954946  | 1.99044600  |
| H | -18.53184333 | 4.16864846  | 0.58558300  |
| C | -11.78552833 | -5.61307254 | -2.61468900 |
| C | -11.52151533 | -4.48507054 | -1.83748200 |
| C | -14.04812333 | -4.85355954 | -3.10377800 |
| C | -13.02897833 | -5.79625354 | -3.23735900 |
| H | -11.01091133 | -6.36150254 | -2.74819100 |
| H | -10.55278333 | -4.34009654 | -1.37060000 |
| H | -15.01096833 | -4.97734654 | -3.58829500 |
| H | -13.19476233 | -6.68494654 | -3.83813600 |
| C | -5.72934833  | 5.40159246  | -3.17746900 |
| C | -5.00241633  | 6.43053746  | -3.76929600 |
| C | -3.60774333  | 6.34365746  | -3.92757000 |
| C | -2.90289733  | 5.22346546  | -3.49731300 |
| C | -3.63422733  | 4.19650946  | -2.90531100 |
| C | -5.02143933  | 4.28169646  | -2.74743000 |
| H | -6.80564533  | 5.46530546  | -3.05561500 |
| H | -5.51918533  | 7.31906646  | -4.11789100 |
| H | -3.07631633  | 7.16653546  | -4.39472000 |
| H | -1.82710333  | 5.14490146  | -3.61504300 |
| C | 0.99866567   | 1.47445246  | -2.29916500 |
| C | 2.17553867   | 0.74986446  | -2.13063100 |
| C | 2.17413567   | -0.52048654 | -1.52886100 |
| C | 0.99371567   | -1.10317754 | -1.07780600 |



|   |              |             |             |
|---|--------------|-------------|-------------|
| C | -0.18096433  | -0.37609054 | -1.24778900 |
| C | -0.18017033  | 0.88997846  | -1.84751000 |
| H | 0.98899567   | 2.45507346  | -2.76270400 |
| H | 3.11588167   | 1.17163346  | -2.47044400 |
| H | 3.11250267   | -1.05344954 | -1.41633400 |
| H | 0.97629067   | -2.08269354 | -0.61206100 |
| C | -4.97123133  | -5.37743554 | 1.86602700  |
| C | -3.58292133  | -5.45331454 | 1.69462100  |
| C | -2.86796133  | -4.41621954 | 1.08747300  |
| C | -3.59588633  | -3.31379254 | 0.66609000  |
| C | -4.97672833  | -3.23993654 | 0.83887000  |
| C | -5.69695833  | -4.26178754 | 1.43667500  |
| H | -5.49138133  | -6.20343254 | 2.34025600  |
| H | -3.05468833  | -6.33634454 | 2.03958500  |
| H | -1.79317133  | -4.46692154 | 0.94830900  |
| H | -6.77267433  | -4.18765054 | 1.55832800  |
| C | -11.96883833 | -0.30808854 | -3.28047900 |
| O | -11.92905433 | -1.39223854 | -3.80059900 |
| O | -11.05463233 | 0.29067346  | -2.56135900 |
| H | -10.17702933 | -0.28134254 | -2.35167600 |
| C | -13.20363033 | 0.60863846  | -3.45125100 |
| F | -14.26905833 | -0.07793254 | -3.85868400 |
| F | -13.52536033 | 1.23901746  | -2.31153700 |
| F | -12.94171233 | 1.55414846  | -4.37061300 |

17

SCF energy in solution: -3871.162312

Free energy in solution: -3870.402566

|   |             |            |            |
|---|-------------|------------|------------|
| C | -6.13695103 | 2.88089002 | 0.03771277 |
| C | -4.03712503 | 3.47157202 | 0.08288877 |
| C | -8.16523303 | 3.89113902 | 0.57440477 |
| C | -8.74644903 | 5.91769402 | 1.42753777 |
| H | -6.73764403 | 5.34947802 | 1.08606377 |
| C | -7.52877303 | 7.78340902 | 2.12310477 |
| C | -5.42371303 | 8.34001302 | 2.22267777 |
| C | -1.92438203 | 7.35402602 | 1.55415777 |
| C | -1.55553203 | 6.07353102 | 0.92446977 |
| C | -3.40611103 | 7.34544802 | 1.64067977 |
| C | -2.82199403 | 5.33663402 | 0.71972677 |
| H | -4.81540703 | 5.88296302 | 1.08426677 |
| N | -4.07753903 | 8.34031902 | 2.12844277 |
| N | -2.88481503 | 4.14188502 | 0.21202577 |
| N | -7.45221503 | 2.86628802 | 0.12751077 |

|   |             |            |             |
|---|-------------|------------|-------------|
| N | -8.66618103 | 7.13338502 | 1.92388377  |
| N | -7.71614503 | 5.09467802 | 1.03347977  |
| N | -6.25618503 | 7.35097102 | 1.84952777  |
| N | -3.83580303 | 6.14819802 | 1.13447477  |
| N | -5.28285103 | 3.91244002 | 0.34208077  |
| N | 0.55355397  | 8.36316502 | -0.26537523 |
| N | -0.42264403 | 5.48224902 | 0.74995777  |
| C | 4.26827197  | 1.67603702 | 2.71166177  |
| C | 2.94431597  | 2.07495402 | 2.52081777  |
| C | 5.08970597  | 2.77513902 | 2.17827477  |
| C | 3.02079497  | 3.39237002 | 1.87269277  |
| C | 8.65656197  | 3.65632702 | 1.79405177  |
| C | 9.10317397  | 4.87662002 | 1.27158077  |
| C | 7.19415097  | 3.68013702 | 1.78457077  |
| C | 7.92196497  | 5.67112102 | 0.93344177  |
| H | 5.86983897  | 5.18603602 | 1.13516777  |
| C | 6.82764997  | 7.56831102 | 0.13596277  |
| C | 4.76527497  | 8.22600602 | -0.14030623 |
| C | 1.24614997  | 7.31683102 | 0.23679577  |
| C | 0.79361897  | 6.06289202 | 0.71579877  |
| C | 2.68062597  | 7.26585602 | 0.23010377  |
| C | 1.97524197  | 5.27441102 | 1.00093477  |
| H | 4.01382597  | 5.75702302 | 0.87334677  |
| N | 3.44798497  | 8.26831502 | -0.16370323 |
| N | 1.93909797  | 4.06347302 | 1.54604377  |
| N | 6.43207997  | 2.70814202 | 2.21112277  |
| N | 7.94506997  | 6.86843102 | 0.42942577  |
| N | 6.83075097  | 4.89381802 | 1.26275777  |
| N | 5.55442897  | 7.18003502 | 0.28700177  |
| N | 3.05539397  | 6.03293802 | 0.70513477  |
| N | 4.33190097  | 3.77215902 | 1.69468077  |
| N | -1.15231203 | 8.24717602 | 2.06503077  |
| H | 0.31580597  | 7.87905602 | 2.83157777  |
| H | -1.72835503 | 8.95897702 | 2.52716677  |
| H | -0.28674503 | 8.64212602 | 0.22917777  |
| H | 1.14366597  | 9.12483602 | -0.58166023 |
| H | -0.68355303 | 3.49232502 | 1.55092877  |
| O | -1.90610503 | 3.72357202 | 2.97776477  |
| O | -0.98325503 | 2.90203602 | 2.26945177  |
| C | 9.54930797  | 2.67492702 | 2.21438877  |
| C | 10.46043697 | 5.15897702 | 1.15152077  |
| C | 11.35603797 | 4.17928002 | 1.57059077  |
| C | 10.90730997 | 2.95447702 | 2.09463977  |
| H | 9.18809097  | 1.73480602 | 2.61742777  |

|   |              |             |             |
|---|--------------|-------------|-------------|
| H | 10.79461997  | 6.10800302  | 0.74609877  |
| H | 12.42303397  | 4.36129202  | 1.49290477  |
| H | 11.63654097  | 2.21576202  | 2.41088777  |
| C | 6.91819797   | 8.92387602  | -0.41481623 |
| C | 5.59652197   | 9.34622902  | -0.58868623 |
| C | 5.30336497   | 10.60646902 | -1.10085823 |
| C | 6.37733597   | 11.42992202 | -1.43212123 |
| C | 7.70483997   | 11.00451102 | -1.25640123 |
| C | 7.99455997   | 9.74204002  | -0.74366823 |
| H | 4.27663197   | 10.93103402 | -1.23474323 |
| H | 6.18864397   | 12.42040102 | -1.83410023 |
| H | 8.51533197   | 11.67412602 | -1.52587823 |
| H | 9.01551197   | 9.40229402  | -0.60344123 |
| C | 2.18460197   | 0.07550702  | 3.54242577  |
| C | 1.87291897   | 1.29513202  | 2.93536777  |
| C | 4.58215297   | 0.46579402  | 3.31470777  |
| C | 3.51309997   | -0.33383598 | 3.72592277  |
| H | 1.38065197   | -0.56839198 | 3.88469777  |
| H | 0.84800997   | 1.63280302  | 2.80337977  |
| H | 5.61359597   | 0.16250502  | 3.46121077  |
| H | 3.71185197   | -1.28844298 | 4.20284277  |
| C | -5.74888203  | 10.71745002 | 3.27524877  |
| C | -6.74527003  | 11.58422902 | 3.71484577  |
| C | -8.10362303  | 11.22582802 | 3.64763977  |
| C | -8.50148703  | 9.99212802  | 3.13990777  |
| C | -7.50240503  | 9.12726902  | 2.70024277  |
| C | -6.15067403  | 9.48395902  | 2.76716877  |
| H | -4.69880503  | 10.98684602 | 3.32489777  |
| H | -6.47338203  | 12.55454702 | 4.11809077  |
| H | -8.85298703  | 11.92760702 | 4.00002977  |
| H | -9.54707903  | 9.70713402  | 3.08511077  |
| C | -11.30926803 | 5.51278902  | 1.40847277  |
| C | -12.26562203 | 4.56500502  | 1.08045577  |
| C | -11.90387903 | 3.30604002  | 0.55164977  |
| C | -10.57673103 | 2.96937302  | 0.33988277  |
| C | -9.60795203  | 3.92303902  | 0.66959077  |
| C | -9.96805303  | 5.17788302  | 1.19647877  |
| H | -11.57737103 | 6.48193802  | 1.81548677  |
| H | -13.31657403 | 4.78995902  | 1.23163377  |
| H | -12.68444303 | 2.59239802  | 0.30853477  |
| H | -10.28525603 | 2.00609102  | -0.06507923 |
| C | -3.40609203  | -0.06154898 | -1.18749023 |
| C | -4.75624103  | -0.44116398 | -1.22930323 |
| C | -5.77070203  | 0.44037102  | -0.85180423 |

|   |             |             |             |
|---|-------------|-------------|-------------|
| C | -5.38591903 | 1.70924002  | -0.43833223 |
| C | -4.04292403 | 2.08657102  | -0.40418623 |
| C | -3.02618303 | 1.21486702  | -0.77019123 |
| H | -2.64553803 | -0.77799498 | -1.48106323 |
| H | -5.01357303 | -1.44319798 | -1.55792323 |
| H | -6.81661103 | 0.15248102  | -0.87466823 |
| H | -1.98612503 | 1.51954602  | -0.71903923 |
| C | 0.90283397  | 6.38311002  | 3.85129177  |
| O | -0.13926403 | 5.77510602  | 3.83890877  |
| O | 1.13600297  | 7.56562102  | 3.33899377  |
| H | -1.31957403 | 4.19584402  | 3.59125777  |
| C | 2.16380897  | 5.80981002  | 4.53466477  |
| F | 1.99081797  | 4.53168402  | 4.84742177  |
| F | 3.23170897  | 5.91037902  | 3.73361677  |
| F | 2.42344097  | 6.49304102  | 5.65724477  |

18

SCF energy in solution: -3192.767616

Free energy in solution: -3192.064452

|   |             |             |             |
|---|-------------|-------------|-------------|
| C | -3.52682961 | -0.09043928 | 0.04616855  |
| C | -4.81999061 | 0.43310372  | 0.00374555  |
| C | -2.63576161 | 1.03098172  | -0.28346345 |
| C | -4.66029861 | 1.84820672  | -0.35210245 |
| C | 1.45787039  | 3.02331372  | -1.03029345 |
| C | -0.48971261 | 1.87112072  | -0.62724645 |
| C | 0.33327039  | 3.91144672  | -1.19464145 |
| H | -1.73434561 | 3.53179772  | -0.98484345 |
| C | -0.51473261 | 7.38272672  | -2.04798345 |
| C | -1.81832061 | 7.88646572  | -2.10342645 |
| C | -0.64936461 | 5.97482272  | -1.66849445 |
| C | -2.68271961 | 6.75957472  | -1.75298745 |
| C | -6.31028961 | 6.09915572  | -1.36154745 |
| C | -6.85634761 | 4.77727372  | -0.96854945 |
| C | -4.82571261 | 5.92885872  | -1.39939245 |
| C | -5.67548561 | 3.88995972  | -0.80538445 |
| H | -3.61162961 | 4.25803372  | -0.99750145 |
| N | -4.02870661 | 6.89937672  | -1.71008745 |
| N | -5.74314861 | 2.63592272  | -0.47754045 |
| N | -1.33004561 | 0.88590672  | -0.32974845 |
| N | 0.39952739  | 5.18933372  | -1.52757345 |
| N | -0.79114461 | 3.16579472  | -0.94075745 |
| N | -1.97932361 | 5.64806272  | -1.50049045 |
| N | -4.55337061 | 4.63686672  | -1.05463745 |

|   |              |             |             |
|---|--------------|-------------|-------------|
| N | -3.36921661  | 2.17640272  | -0.51563045 |
| N | -9.24598261  | 7.16775472  | -0.12517945 |
| N | -8.03174961  | 4.26365372  | -0.90727245 |
| C | -13.33393161 | 1.01402072  | -1.88489945 |
| C | -11.31777061 | 1.83219472  | -1.69174645 |
| C | -16.95451461 | 1.70359372  | -1.71791345 |
| C | -17.49340261 | 2.95819872  | -1.39736145 |
| C | -15.50203061 | 1.82539772  | -1.67685245 |
| C | -16.37842861 | 3.86647872  | -1.15409045 |
| H | -14.29584561 | 3.49526872  | -1.23092845 |
| C | -15.61352961 | 7.32846672  | -0.23513045 |
| C | -14.32355261 | 7.85120372  | -0.09373345 |
| C | -15.42943461 | 5.92629072  | -0.61422445 |
| C | -13.41819961 | 6.74168372  | -0.39485745 |
| C | -9.82339261  | 6.04881972  | -0.58148745 |
| C | -9.26575361  | 4.79594772  | -0.94145245 |
| C | -11.26303261 | 5.89980372  | -0.62818145 |
| C | -10.39109361 | 3.89766372  | -1.17157445 |
| H | -12.46716461 | 4.23567072  | -1.12753845 |
| N | -12.09821261 | 6.87701872  | -0.35523045 |
| N | -10.27887661 | 2.62217072  | -1.50275445 |
| N | -14.66035361 | 0.84943172  | -1.92378745 |
| N | -16.48586861 | 5.12353272  | -0.82741645 |
| N | -15.23150961 | 3.12312372  | -1.33868445 |
| N | -14.12182961 | 5.60911072  | -0.70278045 |
| N | -11.53495661 | 4.60707772  | -0.99774945 |
| N | -12.64915161 | 2.14447872  | -1.61219545 |
| N | -6.93878661  | 7.15728772  | -1.69635545 |
| H | -6.26055161  | 7.86962172  | -1.98701745 |
| H | -9.89602161  | 7.92244372  | 0.06294755  |
| H | -8.34302361  | 7.41171172  | -0.54931145 |
| C | -12.42493561 | -0.11061128 | -2.15966345 |
| C | -11.13769961 | 0.41372672  | -2.03623545 |
| C | -10.00750061 | -0.36939528 | -2.23116145 |
| C | -10.21338761 | -1.71153528 | -2.55466045 |
| C | -11.50722561 | -2.24099328 | -2.67691945 |
| C | -12.63731661 | -1.44533428 | -2.48123745 |
| H | -9.01324461  | 0.05539772  | -2.13614645 |
| H | -9.35830461  | -2.36028828 | -2.71707645 |
| H | -11.62784761 | -3.28952528 | -2.93021745 |
| H | -13.64161561 | -1.84523728 | -2.57522345 |
| C | -19.68886461 | 2.07637272  | -1.64082245 |
| C | -18.87110361 | 3.16340172  | -1.35418745 |
| C | -17.77354461 | 0.61319472  | -2.00572345 |

|   |              |             |             |
|---|--------------|-------------|-------------|
| C | -19.14765361 | 0.81729172  | -1.96233145 |
| H | -20.76716261 | 2.19683272  | -1.61725845 |
| H | -19.27690561 | 4.13815072  | -1.10531345 |
| H | -17.34245261 | -0.35129128 | -2.25215645 |
| H | -19.81944261 | -0.00671828 | -2.17978845 |
| C | -16.54184561 | 9.44225172  | 0.33874755  |
| C | -15.24597561 | 9.96855872  | 0.48111955  |
| C | -14.11812861 | 9.18049372  | 0.26686055  |
| C | -16.74398161 | 8.11257072  | -0.02161845 |
| H | -17.39692461 | 10.08738472 | 0.51407055  |
| H | -15.12656861 | 11.00981072 | 0.76360055  |
| H | -13.11576961 | 9.58179672  | 0.37528255  |
| H | -17.73954361 | 7.69579972  | -0.13408945 |
| C | -3.29897261  | -1.42671128 | 0.35377155  |
| C | -4.41577761  | -2.22009528 | 0.61849655  |
| C | -5.71547761  | -1.69015628 | 0.57781655  |
| C | -5.93841761  | -0.34833028 | 0.26854255  |
| H | -2.29168761  | -1.82899528 | 0.38501155  |
| H | -4.28054761  | -3.26900328 | 0.86318855  |
| H | -6.55905361  | -2.33846028 | 0.79327955  |
| H | -6.93560261  | 0.07918172  | 0.23638355  |
| C | 0.94701339   | 1.75715972  | -0.67870445 |
| C | 2.83641839   | 3.23387772  | -1.16049145 |
| C | 3.67393539   | 2.15582372  | -0.93175045 |
| C | 3.16111439   | 0.88568272  | -0.57899745 |
| C | 1.80024839   | 0.67045572  | -0.44846545 |
| H | 3.22039739   | 4.21167872  | -1.43130345 |
| H | 4.74797539   | 2.28237872  | -1.02352245 |
| H | 3.85316939   | 0.06729372  | -0.40837045 |
| H | 1.39514639   | -0.29897628 | -0.17823745 |
| C | -0.97524461  | 10.02436572 | -2.71803045 |
| C | 0.33504439   | 9.51837272  | -2.66288345 |
| C | 0.58449139   | 8.18966572  | -2.32720645 |
| C | -2.07266661  | 9.21368372  | -2.43866445 |
| H | -1.13012961  | 11.06527572 | -2.98355145 |
| H | 1.16630839   | 10.17951072 | -2.88694345 |
| H | 1.59275839   | 7.79112072  | -2.28248545 |
| H | -3.08752961  | 9.59579772  | -2.47903945 |

TS19

SCF energy in solution: -3192.73431

Free energy in solution: -3192.030535

|   |             |            |            |
|---|-------------|------------|------------|
| C | -7.42894072 | 0.47803617 | 0.00000000 |
|---|-------------|------------|------------|

|   |              |             |             |
|---|--------------|-------------|-------------|
| C | -9.43481272  | 0.31162617  | 0.84868900  |
| C | -3.91523872  | -2.51147183 | -0.13688500 |
| C | -5.55952472  | -0.90159883 | -0.15800300 |
| C | -5.08726572  | -3.01178383 | 0.54898100  |
| H | -6.94793672  | -2.07258483 | 0.90690500  |
| C | -7.65359972  | -6.05357883 | 2.87257400  |
| C | -6.29921672  | -4.62701583 | 1.71726900  |
| C | -8.29977472  | -4.77938383 | 2.56831800  |
| C | -11.54423872 | -3.11619483 | 3.15778900  |
| C | -11.87715172 | -1.80652883 | 2.63118400  |
| C | -10.17038672 | -3.40839983 | 2.68643600  |
| C | -10.66979672 | -1.28782083 | 1.99539000  |
| H | -8.81926872  | -2.21577983 | 1.59415900  |
| N | -9.56743572  | -4.52379083 | 2.95415800  |
| N | -10.55293972 | -0.10568283 | 1.45000000  |
| N | -6.18926172  | 0.24079617  | -0.38794200 |
| N | -5.20524272  | -4.19878683 | 1.10257500  |
| N | -6.02383572  | -2.00434783 | 0.49847800  |
| N | -7.48260472  | -3.95599583 | 1.88610100  |
| N | -9.73483572  | -2.29368983 | 2.02460600  |
| N | -8.27701172  | -0.36169583 | 0.67300400  |
| N | -12.95748672 | -4.17987283 | 2.08524600  |
| N | -13.06443672 | -1.23892583 | 2.53957400  |
| C | -19.32765972 | -0.02061983 | 1.81897800  |
| C | -17.21724872 | -0.08205083 | 2.37755400  |
| C | -22.15387072 | -1.87255583 | 0.35895900  |
| C | -22.05939572 | -3.18770983 | -0.13278600 |
| C | -20.84351072 | -1.49547783 | 0.84457900  |
| C | -20.69054372 | -3.62192583 | 0.05005500  |
| H | -19.04156972 | -2.58707483 | 0.87369900  |
| C | -18.45734572 | -6.47769283 | -0.51663500 |
| C | -17.10656372 | -6.50996083 | -0.15436400 |
| C | -18.94730972 | -5.16398983 | -0.09560400 |
| C | -16.84307072 | -5.21544883 | 0.47344700  |
| C | -14.02317572 | -3.43742683 | 2.06925300  |
| C | -14.10589272 | -2.06533283 | 2.51205500  |
| C | -15.35090872 | -3.76656383 | 1.51215700  |
| C | -15.48417172 | -1.62920283 | 2.30504600  |
| H | -17.15030172 | -2.66402883 | 1.52847600  |
| N | -15.62528172 | -4.90944683 | 0.95724500  |
| N | -15.95057172 | -0.44532783 | 2.60515300  |
| N | -20.53537072 | -0.32368283 | 1.37572200  |
| N | -20.20643772 | -4.79673383 | -0.29137100 |
| N | -20.02598672 | -2.57012883 | 0.63571100  |

|   |              |             |             |
|---|--------------|-------------|-------------|
| N | -17.94570572 | -4.44026983 | 0.49392600  |
| N | -16.16007172 | -2.68500883 | 1.74727500  |
| N | -18.21477072 | -0.81796283 | 1.84088500  |
| N | -11.89107972 | -3.58494283 | 4.37042400  |
| H | -11.48425372 | -4.48013683 | 4.61629900  |
| H | -12.83156272 | -3.41451383 | 4.69903200  |
| H | -13.00866872 | -4.98210783 | 1.45124300  |
| C | -19.02842972 | 1.30580117  | 2.37671500  |
| C | -17.67845472 | 1.26752117  | 2.72955900  |
| C | -17.03804672 | 2.36533517  | 3.29157700  |
| C | -17.80382072 | 3.51411817  | 3.49138200  |
| C | -19.16177972 | 3.55392017  | 3.13753700  |
| C | -19.79639572 | 2.44745417  | 2.57238000  |
| H | -15.98689872 | 2.32017617  | 3.55748200  |
| H | -17.34465872 | 4.39567917  | 3.92744000  |
| H | -19.72592272 | 4.46554117  | 3.30772600  |
| H | -20.84509372 | 2.46953417  | 2.29458800  |
| C | -9.36247972  | 1.66086517  | 0.27081800  |
| C | -8.08158072  | 1.76742817  | -0.27234300 |
| C | -7.65981472  | 2.92701917  | -0.91085400 |
| C | -8.57185772  | 3.98059817  | -0.98659400 |
| C | -9.86009472  | 3.87120017  | -0.44050800 |
| C | -10.27743772 | 2.70373617  | 0.19977700  |
| H | -6.66218272  | 3.00244517  | -1.33083300 |
| H | -8.28264472  | 4.90444217  | -1.47764600 |
| H | -10.54177072 | 4.71200917  | -0.52012600 |
| H | -11.27038872 | 2.60315917  | 0.62592600  |
| C | -7.16577372  | -8.25330483 | 3.63881700  |
| C | -5.87436572  | -8.15394283 | 3.09069300  |
| C | -5.45773272  | -7.00379583 | 2.42600400  |
| C | -6.36905872  | -5.95547883 | 2.32540000  |
| C | -8.07434172  | -7.20369083 | 3.53694400  |
| H | -7.45520572  | -9.16659483 | 4.14896000  |
| H | -5.19274872  | -8.99290883 | 3.18943300  |
| H | -4.46366672  | -6.91905283 | 1.99923800  |
| H | -9.07331972  | -7.27405883 | 3.95511100  |
| C | -2.67055472  | -3.09581883 | -0.39152100 |
| C | -1.73951772  | -2.34179083 | -1.08836800 |
| C | -2.03297072  | -1.03187083 | -1.52718400 |
| C | -3.26506972  | -0.44875183 | -1.27758000 |
| C | -4.20739472  | -1.20599483 | -0.57432800 |
| H | -2.45468372  | -4.10280083 | -0.05063100 |
| H | -0.76259472  | -2.76260883 | -1.30402600 |
| H | -1.27558172  | -0.47560683 | -2.06999800 |



|   |              |             |             |
|---|--------------|-------------|-------------|
| H | -3.50332172  | 0.55627317  | -1.60934300 |
| C | -18.27313972 | -8.67790083 | -1.40348600 |
| C | -16.91556172 | -8.71030183 | -1.03908800 |
| C | -16.31226572 | -7.62531283 | -0.40840600 |
| C | -19.06388572 | -7.56040483 | -1.14762900 |
| H | -18.70935472 | -9.54258083 | -1.89372300 |
| H | -16.33063472 | -9.59861683 | -1.25561700 |
| H | -15.26509472 | -7.64182383 | -0.12417700 |
| H | -20.11226172 | -7.52630783 | -1.42558900 |
| C | -24.36893972 | -3.13718883 | -0.70860300 |
| C | -23.17300072 | -3.83708083 | -0.67456200 |
| C | -23.36241872 | -1.17001183 | 0.32295700  |
| C | -24.46328172 | -1.81738983 | -0.21512500 |
| H | -25.25436272 | -3.60906983 | -1.12251200 |
| H | -23.09014872 | -4.85115383 | -1.05092200 |
| H | -23.42153172 | -0.15649083 | 0.70533000  |
| H | -25.41864572 | -1.30461683 | -0.26070200 |

20

SCF energy in solution: -3192.785421

Free energy in solution: -3192.078052

|   |              |             |             |
|---|--------------|-------------|-------------|
| C | -6.29198980  | 1.51162788  | 0.00000000  |
| C | -8.43479580  | 1.53757288  | 0.42049100  |
| C | -4.65429980  | -0.13482712 | -0.22818400 |
| C | -4.66483680  | -2.40066012 | -0.09166600 |
| H | -6.40017280  | -1.23567912 | 0.19915400  |
| C | -6.72111880  | -5.38556612 | 0.53001000  |
| C | -8.08309680  | -5.34893512 | 0.84312500  |
| C | -6.31400080  | -3.98742212 | 0.36266100  |
| C | -8.43935580  | -3.92851512 | 0.85162900  |
| C | -11.47474080 | -1.88506112 | 1.53630200  |
| C | -11.50615280 | -0.41748812 | 1.11781300  |
| C | -10.07126480 | -2.29481512 | 1.13670800  |
| C | -10.11345180 | -0.00186212 | 0.88731000  |
| H | -8.36871280  | -1.16440212 | 0.66379200  |
| N | -9.70944580  | -3.53441612 | 1.13754400  |
| N | -9.71940680  | 1.21378388  | 0.68752500  |
| N | -5.05662680  | 1.13245588  | -0.22621900 |
| N | -5.08066480  | -3.65214212 | 0.06939700  |
| N | -5.40832580  | -1.25353312 | -0.00441500 |
| N | -7.39900380  | -3.14663312 | 0.56685200  |
| N | -9.36381980  | -1.16247512 | 0.87375200  |
| N | -7.38943580  | 0.71446288  | 0.27854600  |

|   |              |             |             |
|---|--------------|-------------|-------------|
| N | -12.50947480 | -2.57665112 | 0.79568800  |
| N | -12.56535380 | 0.26801588  | 0.88728000  |
| C | -17.21601580 | 2.90202888  | 0.64385200  |
| C | -18.94128080 | 1.44426888  | 0.32420600  |
| C | -16.77588780 | 1.49862688  | 0.60859800  |
| C | -21.93915980 | -0.65170512 | -0.20121900 |
| C | -21.90240380 | -2.04809212 | -0.30096800 |
| C | -20.56702980 | -0.18635112 | -0.00049600 |
| C | -20.50652280 | -2.46393312 | -0.16382600 |
| H | -18.77112880 | -1.28874012 | 0.13045300  |
| C | -18.78353080 | -4.02845912 | -0.07078000 |
| C | -16.61859580 | -4.00447312 | 0.20243600  |
| C | -13.68477680 | -1.89275712 | 0.75535800  |
| C | -13.71119680 | -0.49956712 | 0.87287900  |
| C | -15.01991680 | -2.34719212 | 0.54193700  |
| C | -15.07306280 | -0.08232612 | 0.72108100  |
| H | -16.81698880 | -1.23134812 | 0.42873100  |
| N | -15.37516680 | -3.61411912 | 0.39213500  |
| N | -15.51413580 | 1.17288888  | 0.75600700  |
| N | -20.21856480 | 1.06423888  | 0.13525200  |
| N | -20.08467080 | -3.69260012 | -0.20529900 |
| N | -19.77678880 | -1.30710012 | 0.01090700  |
| N | -17.74201980 | -3.20921012 | 0.12696100  |
| N | -15.81257680 | -1.21833012 | 0.53823400  |
| N | -17.85627080 | 0.66232688  | 0.41204800  |
| N | -11.53550480 | -1.96215512 | 2.98133000  |
| H | -11.41520880 | -2.92130512 | 3.29755800  |
| H | -12.41244880 | -1.59080312 | 3.33701100  |
| H | -12.50273680 | -3.58926312 | 0.75550100  |
| C | -18.32377880 | -7.80223412 | -0.32589000 |
| C | -16.92964280 | -7.78747712 | -0.15158800 |
| C | -16.23575580 | -6.59354512 | 0.03451900  |
| C | -16.97790380 | -5.41653112 | 0.04113800  |
| C | -18.36481480 | -5.43230712 | -0.13350700 |
| C | -19.06298480 | -6.62139612 | -0.31968900 |
| H | -18.82937780 | -8.75200312 | -0.46829300 |
| H | -16.38577380 | -8.72680312 | -0.16368500 |
| H | -15.15897780 | -6.57558412 | 0.16778500  |
| H | -20.13971280 | -6.61997412 | -0.45440400 |
| C | -8.12608580  | -7.72321812 | 0.97911300  |
| C | -6.75752580  | -7.76065012 | 0.66383500  |
| C | -6.03421680  | -6.59148912 | 0.43483500  |
| C | -8.81003180  | -6.51275512 | 1.07381900  |
| H | -8.65576380  | -8.65478812 | 1.15105600  |

|   |              |             |             |
|---|--------------|-------------|-------------|
| H | -6.25672480  | -8.72149212 | 0.59844200  |
| H | -4.97697580  | -6.61195312 | 0.19142400  |
| H | -9.86683580  | -6.47321812 | 1.31737500  |
| C | -8.05443380  | 2.94229688  | 0.24055300  |
| C | -6.68397280  | 2.92628888  | -0.02568600 |
| C | -5.97876080  | 4.10296488  | -0.25160500 |
| C | -6.69693580  | 5.29743388  | -0.20079100 |
| C | -8.07574880  | 5.31094888  | 0.06598800  |
| C | -8.77856280  | 4.12806188  | 0.29120300  |
| H | -4.91374080  | 4.08440188  | -0.45845500 |
| H | -6.18282280  | 6.23821388  | -0.37115400 |
| H | -8.59974680  | 6.26095888  | 0.09588200  |
| H | -9.84409480  | 4.12071688  | 0.49670600  |
| C | -3.31840280  | -1.99569012 | -0.39634200 |
| C | -2.14470380  | -2.73634312 | -0.59659500 |
| C | -0.98551880  | -2.03706712 | -0.87831900 |
| C | -0.97866180  | -0.62365012 | -0.96243300 |
| C | -2.13142480  | 0.11441188  | -0.76608000 |
| C | -3.31131980  | -0.58674812 | -0.47972000 |
| H | -2.15993380  | -3.81905812 | -0.52996100 |
| H | -0.05827980  | -2.57776412 | -1.03919400 |
| H | -0.04655480  | -0.11460812 | -1.18595700 |
| H | -2.13738880  | 1.19750088  | -0.82812900 |
| C | -18.59932880 | 2.86843688  | 0.46350900  |
| C | -16.53242780 | 4.09942588  | 0.80979900  |
| C | -17.28950980 | 5.27176288  | 0.78919600  |
| C | -18.68056780 | 5.23872988  | 0.60827500  |
| C | -19.35960180 | 4.03092288  | 0.44173700  |
| H | -15.45608680 | 4.11136988  | 0.94735800  |
| H | -16.79550080 | 6.23007588  | 0.91464100  |
| H | -19.23529980 | 6.17155388  | 0.59767100  |
| H | -20.43479080 | 3.99363988  | 0.30051600  |
| C | -23.06318880 | -2.79070812 | -0.49603500 |
| C | -23.13638880 | 0.05217788  | -0.29306900 |
| C | -24.29849680 | -0.68788112 | -0.48830900 |
| C | -24.26201480 | -2.08972712 | -0.58828400 |
| H | -23.02205380 | -3.87204912 | -0.57165200 |
| H | -23.14916480 | 1.13400588  | -0.21400700 |
| H | -25.25272080 | -0.17695812 | -0.56547300 |
| H | -25.18917980 | -2.63277812 | -0.74036100 |

21

SCF energy in solution: -3719.617496

Free energy in solution: -3718.879745

|   |              |             |             |
|---|--------------|-------------|-------------|
| C | -6.42118876  | -1.45982319 | -0.01911006 |
| C | -8.58121376  | -1.50422419 | 0.29897194  |
| C | -4.73850376  | -3.04459819 | -0.35354006 |
| C | -4.71079576  | -5.30932819 | -0.51584506 |
| H | -6.48014376  | -4.22090219 | -0.16073106 |
| C | -6.76408376  | -8.36264419 | -0.49141306 |
| C | -8.14230776  | -8.37117219 | -0.25931406 |
| C | -6.35447976  | -6.95712119 | -0.38915806 |
| C | -8.49894376  | -6.97669919 | -0.00186306 |
| C | -11.56572976 | -5.08809519 | 0.94614494  |
| C | -11.62804376 | -3.58099019 | 0.70565894  |
| C | -10.15514876 | -5.42388819 | 0.49999594  |
| C | -10.24575376 | -3.11131919 | 0.52945194  |
| H | -8.47587676  | -4.20292619 | 0.17895694  |
| N | -9.77295276  | -6.64209619 | 0.32707194  |
| N | -9.86761276  | -1.87499219 | 0.48554994  |
| N | -5.16697476  | -1.79585419 | -0.22105706 |
| N | -5.11118376  | -6.57549619 | -0.56209606 |
| N | -5.47986676  | -4.19488319 | -0.31550806 |
| N | -7.45067076  | -6.15889619 | -0.09561906 |
| N | -9.46976776  | -4.25033119 | 0.39350794  |
| N | -7.51548676  | -2.29515319 | 0.11377094  |
| N | -12.60282876 | -5.73211119 | 0.20430494  |
| N | -12.70623576 | -2.89397819 | 0.58257894  |
| C | -17.41587776 | -0.34606219 | 0.67538094  |
| C | -19.11429976 | -1.81408519 | 0.26804294  |
| C | -16.94377176 | -1.72946419 | 0.50709494  |
| C | -22.08485576 | -3.92377219 | -0.36260706 |
| C | -22.02466576 | -5.30605419 | -0.57507906 |
| C | -20.71579976 | -3.44732519 | -0.15570006 |
| C | -20.61703476 | -5.70379019 | -0.50356906 |
| H | -18.89658676 | -4.52262419 | -0.15847806 |
| C | -18.86254876 | -7.23267919 | -0.56992506 |
| C | -16.69250776 | -7.17911319 | -0.35348306 |
| C | -13.78842676 | -5.05801519 | 0.26982194  |
| C | -13.83615776 | -3.67882419 | 0.51253494  |
| C | -15.11732876 | -5.51584619 | 0.05689394  |
| C | -15.20860676 | -3.27628819 | 0.43511794  |
| H | -16.93665376 | -4.43062319 | 0.09266294  |
| N | -15.45672076 | -6.77646119 | -0.17784606 |
| N | -15.67380576 | -2.03705919 | 0.59414894  |
| N | -20.38979676 | -2.20635719 | 0.07567894  |
| N | -20.17606076 | -6.91623519 | -0.64924906 |

|   |              |              |             |
|---|--------------|--------------|-------------|
| N | -19.90456076 | -4.54927119  | -0.25418006 |
| N | -17.83777476 | -6.40426519  | -0.34478006 |
| N | -15.92947276 | -4.40636919  | 0.17357694  |
| N | -18.01249376 | -2.57314519  | 0.26273894  |
| N | -11.67407976 | -5.43919319  | 2.39112394  |
| H | -12.58067176 | -5.11866819  | 2.73579694  |
| H | -10.96298376 | -4.94632419  | 2.93422694  |
| H | -12.59240776 | -6.75360919  | 0.16987194  |
| C | -18.32711676 | -10.97313619 | -1.06984606 |
| C | -16.93035276 | -10.93675919 | -0.92439306 |
| C | -16.25660576 | -9.74032519  | -0.68317906 |
| C | -17.02738476 | -8.58600919  | -0.59396206 |
| C | -18.41708176 | -8.62148519  | -0.73538906 |
| C | -19.09365176 | -9.81266819  | -0.97637706 |
| H | -18.81475176 | -11.92461119 | -1.25675406 |
| H | -16.36692076 | -11.86137319 | -1.00069606 |
| H | -15.17800476 | -9.70281819  | -0.56563606 |
| H | -20.17318976 | -9.83002419  | -1.08485606 |
| C | -8.20254176  | -10.72395319 | -0.57944906 |
| C | -6.81532376  | -10.72112219 | -0.79867906 |
| C | -6.07498376  | -9.53917919  | -0.76427506 |
| C | -8.89053176  | -9.54198319  | -0.31074606 |
| H | -8.74721676  | -11.66169819 | -0.62309106 |
| H | -6.31209076  | -11.66046619 | -1.00503506 |
| H | -5.00481876  | -9.53085019  | -0.94329206 |
| H | -9.96699476  | -9.52728419  | -0.16879306 |
| C | -8.21726776  | -0.08531619  | 0.29151094  |
| C | -6.83521976  | -0.05686419  | 0.09162194  |
| C | -6.13903576  | 1.14558881   | 0.02959294  |
| C | -6.87751976  | 2.31912181   | 0.17453394  |
| C | -8.26786476  | 2.28845781   | 0.37414694  |
| C | -8.96139876  | 1.08105681   | 0.43592394  |
| H | -5.06533776  | 1.16111181   | -0.12636706 |
| H | -6.37135376  | 3.27844381   | 0.13159594  |
| H | -8.80789576  | 3.22389081   | 0.48054694  |
| H | -10.03526476 | 1.04106881   | 0.58723294  |
| C | -3.35751376  | -4.85000019  | -0.69065706 |
| C | -2.16232576  | -5.54348319  | -0.92545606 |
| C | -1.00370876  | -4.79844219  | -1.05163106 |
| C | -1.02031576  | -3.38696719  | -0.94877506 |
| C | -2.19592076  | -2.69532419  | -0.71804806 |
| C | -3.37404276  | -3.44296519  | -0.58783506 |
| H | -2.16058376  | -6.62553519  | -1.00325406 |
| H | -0.05938876  | -5.30137819  | -1.23375306 |

|   |              |              |             |
|---|--------------|--------------|-------------|
| H | -0.08827476  | -2.84101319  | -1.05434406 |
| H | -2.21953576  | -1.61365619  | -0.63848206 |
| C | -18.80196976 | -0.39904019  | 0.52343394  |
| C | -16.75746376 | 0.84975481   | 0.92993294  |
| C | -17.54251776 | 1.99960281   | 1.02902594  |
| C | -18.93630776 | 1.94672781   | 0.87695594  |
| C | -19.59007876 | 0.74076581   | 0.62036394  |
| H | -15.67865576 | 0.87803281   | 1.04362594  |
| H | -17.06851776 | 2.95582381   | 1.22680994  |
| H | -19.51312476 | 2.86230681   | 0.96049994  |
| H | -20.66715676 | 0.68791381   | 0.50015294  |
| C | -23.17471476 | -6.05489819  | -0.80216906 |
| C | -23.29610976 | -3.23958819  | -0.36960006 |
| C | -24.44909576 | -3.98584519  | -0.59711306 |
| C | -24.38891376 | -5.37352919  | -0.81020506 |
| H | -23.11472076 | -7.12565219  | -0.96520006 |
| H | -23.32734276 | -2.16808019  | -0.20335706 |
| H | -25.41427176 | -3.49012419  | -0.61087106 |
| H | -25.30908176 | -5.92184919  | -0.98409206 |
| C | -11.31531776 | -10.31919319 | 2.32249194  |
| F | -11.45840776 | -11.12749119 | 1.27227194  |
| F | -12.14647676 | -10.73660419 | 3.28806994  |
| F | -10.06468676 | -10.43248619 | 2.77307194  |
| C | -11.65344876 | -8.86001619  | 1.93968194  |
| O | -12.23710076 | -8.61323519  | 0.90987894  |
| O | -11.26022776 | -8.03526019  | 2.86813694  |
| H | -11.45905276 | -7.05901319  | 2.63000494  |

TS22

SCF energy in solution: -3719.59916

Free energy in solution: -3718.862216

|   |             |            |             |
|---|-------------|------------|-------------|
| C | -4.32816546 | 1.87338499 | 0.00000000  |
| C | -2.16207046 | 1.87079499 | 0.27429600  |
| C | -5.99123446 | 3.49520599 | -0.21504900 |
| C | -5.98422046 | 5.76644699 | -0.26447300 |
| H | -4.22466046 | 4.62981499 | -0.01391600 |
| C | -4.30766646 | 7.37885399 | -0.10599700 |
| C | -2.15255046 | 7.35724099 | 0.21414300  |
| C | 0.89781654  | 5.35618699 | 0.93302300  |
| C | 0.91523154  | 3.87669499 | 0.73198200  |
| C | -0.50951446 | 5.75580499 | 0.57953500  |
| C | -0.46786146 | 3.44309499 | 0.53930300  |
| H | -2.22432046 | 4.58011999 | 0.26165300  |

|   |             |             |             |
|---|-------------|-------------|-------------|
| N | -0.87466546 | 6.98922399  | 0.47545100  |
| N | -0.87227146 | 2.21242899  | 0.45354500  |
| N | -5.58445146 | 2.23530699  | -0.15546900 |
| N | -5.56563846 | 7.02246099  | -0.25963800 |
| N | -5.22935646 | 4.62896599  | -0.14004200 |
| N | -3.21859746 | 6.55586699  | 0.11210200  |
| N | -1.22662846 | 4.59868999  | 0.45879800  |
| N | -3.22377846 | 2.68497099  | 0.14870200  |
| N | 1.95940254  | 6.07024399  | 0.40693100  |
| N | 2.00105754  | 3.17138499  | 0.65416100  |
| C | 8.38869754  | 1.99946499  | 0.31583300  |
| C | 6.21894554  | 1.95161099  | 0.56258600  |
| C | 10.01171354 | 3.62014199  | -0.07879600 |
| C | 9.94680354  | 5.88054099  | -0.38365100 |
| H | 8.21000154  | 4.72107599  | -0.05582000 |
| C | 8.21726254  | 7.43889999  | -0.42494100 |
| C | 6.04902454  | 7.40299099  | -0.20091100 |
| C | 3.08471954  | 5.33595299  | 0.43296300  |
| C | 3.12337454  | 3.93850699  | 0.64177300  |
| C | 4.43962354  | 5.77176399  | 0.20156800  |
| C | 4.49870854  | 3.51587599  | 0.54020200  |
| H | 6.23690154  | 4.65639099  | 0.20382600  |
| N | 4.79680054  | 7.01894999  | -0.01543500 |
| N | 4.94399154  | 2.27651899  | 0.66738600  |
| N | 9.65999154  | 2.37543599  | 0.12920200  |
| N | 9.51614754  | 7.10517299  | -0.50899300 |
| N | 9.21812654  | 4.73414999  | -0.15395800 |
| N | 7.17149554  | 6.61761999  | -0.20284100 |
| N | 5.22860254  | 4.64632199  | 0.29413400  |
| N | 7.28791654  | 2.77873799  | 0.33351000  |
| N | 0.95193754  | 5.61495499  | 2.61391200  |
| H | 0.13367454  | 5.26537999  | 3.11436300  |
| H | 1.78947854  | 5.15525499  | 2.97520900  |
| C | 1.62651554  | 9.00869599  | 1.62337300  |
| O | 1.91233754  | 8.61711299  | 0.43801800  |
| O | 1.33471954  | 8.34370599  | 2.60836700  |
| H | 1.04870854  | 6.65240799  | 2.71884700  |
| C | 1.73698254  | 10.54382499 | 1.78410100  |
| F | 3.01076154  | 10.87332999 | 2.04275600  |
| F | 0.98152554  | 10.97790199 | 2.78968000  |
| F | 1.36495954  | 11.18852099 | 0.67195000  |
| H | 1.92796354  | 7.53434799  | 0.36310300  |
| C | 7.78356354  | 8.83150899  | -0.57772800 |
| C | 6.39329054  | 8.80614799  | -0.43516100 |

|   |             |             |             |
|---|-------------|-------------|-------------|
| C | 8.46594454  | 10.02124099 | -0.81303200 |
| C | 5.62768654  | 9.96458599  | -0.52271200 |
| C | 7.70568254  | 11.18601799 | -0.89976000 |
| H | 9.54542554  | 10.03386599 | -0.92308700 |
| C | 6.30772754  | 11.15797199 | -0.75682200 |
| H | 4.54827054  | 9.92871799  | -0.41306800 |
| H | 8.19912254  | 12.13562899 | -1.08135400 |
| H | 5.74963054  | 12.08603899 | -0.83046500 |
| C | 11.38275354 | 4.07674599  | -0.27714300 |
| C | 11.34320654 | 5.46596799  | -0.46354500 |
| C | 12.58664554 | 3.37521999  | -0.29910500 |
| C | 12.50767354 | 6.20064599  | -0.67788500 |
| C | 13.74866554 | 4.10723699  | -0.51341200 |
| H | 12.60220254 | 2.30031699  | -0.15362400 |
| C | 13.70927554 | 5.50180999  | -0.70015700 |
| H | 12.46452754 | 7.27513299  | -0.82063800 |
| H | 14.70654154 | 3.59785699  | -0.53803000 |
| H | 14.63793954 | 6.03873199  | -0.86456900 |
| C | 6.66278954  | 0.55689799  | 0.69747700  |
| C | 8.04958854  | 0.58676199  | 0.54102800  |
| C | 5.98140554  | -0.63191001 | 0.92741300  |
| C | 8.81451954  | -0.57145801 | 0.60958800  |
| C | 6.74319154  | -1.79862201 | 0.99761200  |
| H | 4.90255254  | -0.64128601 | 1.04414300  |
| C | 8.13789354  | -1.76919901 | 0.84144700  |
| H | 9.89205654  | -0.53748001 | 0.48639800  |
| H | 6.25129154  | -2.74976701 | 1.17524700  |
| H | 8.69680454  | -2.69766901 | 0.90217300  |
| C | -3.93459646 | 0.45975399  | 0.03303100  |
| C | -2.54895646 | 0.45846499  | 0.20551100  |
| C | -4.65105846 | -0.72728601 | -0.07267000 |
| C | -1.82042846 | -0.72378701 | 0.27825600  |
| C | -3.92810646 | -1.91748201 | -0.00011700 |
| H | -5.72770246 | -0.71939301 | -0.20739500 |
| C | -2.53414446 | -1.91671301 | 0.17227900  |
| H | -0.74326446 | -0.70700001 | 0.40914900  |
| H | -4.44988746 | -2.86604501 | -0.07929900 |
| H | -2.00670946 | -2.86394601 | 0.22230200  |
| C | -7.35191546 | 5.33642699  | -0.42390800 |
| C | -7.35660246 | 3.92726499  | -0.39194600 |
| C | -8.53980546 | 6.05922399  | -0.59019000 |
| C | -8.54840846 | 3.20451899  | -0.52627400 |
| C | -9.71463046 | 5.33876999  | -0.72077700 |
| H | -8.52554446 | 7.14369599  | -0.61394800 |



|   |              |             |             |
|---|--------------|-------------|-------------|
| C | -9.71915346  | 3.92499599  | -0.68918800 |
| H | -8.54003346  | 2.11998999  | -0.50160300 |
| H | -10.65482146 | 5.86505299  | -0.85091000 |
| H | -10.66254046 | 3.39921499  | -0.79588000 |
| C | -2.50192646  | 8.76531999  | 0.04316900  |
| C | -3.88614446  | 8.78225499  | -0.14985100 |
| C | -1.74372046  | 9.93100499  | 0.03137500  |
| C | -4.56971146  | 9.97830199  | -0.34462600 |
| C | -2.42444646  | 11.13080799 | -0.16209300 |
| H | -0.66557346  | 9.89782199  | 0.14362400  |
| C | -3.81774546  | 11.15251599 | -0.34322100 |
| H | -5.64439446  | 9.98927799  | -0.49409500 |
| H | -1.87015446  | 12.06375299 | -0.17814100 |
| H | -4.31546046  | 12.10567599 | -0.49148500 |

23

SCF energy in solution: -3719.627963

Free energy in solution: -3718.899452

|   |              |             |             |
|---|--------------|-------------|-------------|
| C | -7.17054278  | 1.38242892  | 0.00000000  |
| C | -9.34844978  | 1.41834792  | -0.13338800 |
| C | -5.50074878  | -0.24149608 | 0.00367500  |
| C | -5.51283278  | -2.51556508 | -0.14894800 |
| H | -7.28177778  | -1.36426708 | -0.18547300 |
| C | -7.20203178  | -4.09620108 | -0.39392200 |
| C | -9.37289278  | -4.06451708 | -0.57987700 |
| C | -12.41221978 | -2.01292808 | -0.53376700 |
| C | -12.43012178 | -0.58783908 | -0.41519900 |
| C | -11.03112478 | -2.43845908 | -0.56041300 |
| C | -11.04128478 | -0.15601508 | -0.36243000 |
| H | -9.27377278  | -1.28899308 | -0.42989900 |
| N | -10.64324378 | -3.69040208 | -0.63619200 |
| N | -10.62788478 | 1.08315292  | -0.22976100 |
| N | -5.88919478  | 1.00824492  | 0.06149300  |
| N | -5.91612778  | -3.75684208 | -0.26416900 |
| N | -6.27045278  | -1.37085008 | -0.12312500 |
| N | -8.27514178  | -3.27013208 | -0.43046300 |
| N | -10.28744878 | -1.29524208 | -0.47105200 |
| N | -8.26156278  | 0.59193592  | -0.13562400 |
| N | -13.49639178 | -2.76952008 | -0.55058100 |
| N | -13.53110578 | 0.13984892  | -0.32752500 |
| C | -19.91929678 | 1.24105692  | 0.02882400  |
| C | -17.74098578 | 1.32708792  | -0.07473000 |
| C | -21.55830178 | -0.41273508 | 0.02316600  |

|   |              |             |             |
|---|--------------|-------------|-------------|
| C | -21.49727078 | -2.69058708 | -0.09192200 |
| H | -19.75207778 | -1.50228908 | -0.12420200 |
| C | -19.76845378 | -4.23837508 | -0.25454100 |
| C | -17.59325078 | -4.17742008 | -0.37956400 |
| C | -14.61284978 | -2.04441508 | -0.44801700 |
| C | -14.62752478 | -0.62227608 | -0.34896000 |
| C | -15.97408078 | -2.50808908 | -0.40212300 |
| C | -16.01576578 | -0.22124108 | -0.25709400 |
| H | -17.75914278 | -1.39950508 | -0.23903900 |
| N | -16.33973778 | -3.77609408 | -0.44054500 |
| N | -16.46227478 | 1.01712192  | -0.15733300 |
| N | -21.20111278 | 0.84173892  | 0.07099800  |
| N | -21.07136378 | -3.92198408 | -0.17021100 |
| N | -20.76344478 | -1.52900508 | -0.07342600 |
| N | -18.71814978 | -3.39655208 | -0.28440100 |
| N | -16.74641678 | -1.38220308 | -0.29341900 |
| N | -18.81796978 | 0.47354492  | -0.07163700 |
| N | -11.62717878 | -1.83872208 | 2.36074800  |
| H | -10.70527178 | -1.79429908 | 2.78542800  |
| H | -12.26179978 | -1.35535908 | 2.98937500  |
| C | -12.85260178 | -5.64463708 | 1.00641000  |
| O | -13.35065978 | -5.46946808 | -0.18839400 |
| O | -12.47310178 | -4.81234708 | 1.79210700  |
| H | -11.90280478 | -2.81960708 | 2.34370900  |
| C | -12.85331178 | -7.14335308 | 1.38602800  |
| F | -14.08766378 | -7.50245408 | 1.77335400  |
| F | -12.01454878 | -7.38345908 | 2.38784400  |
| F | -12.51086578 | -7.92454608 | 0.35318600  |
| H | -13.40648478 | -4.48376708 | -0.39560800 |
| C | -19.33927378 | -5.64145308 | -0.32829700 |
| C | -17.94561778 | -5.60073008 | -0.40745200 |
| C | -20.03098178 | -6.84719608 | -0.32519100 |
| C | -17.18243978 | -6.75976208 | -0.48443100 |
| C | -19.27305578 | -8.01568708 | -0.40289900 |
| H | -21.11399778 | -6.87098008 | -0.26303600 |
| C | -17.87177378 | -7.97240708 | -0.48030600 |
| H | -16.09937478 | -6.71364208 | -0.54141500 |
| H | -19.77273978 | -8.97919508 | -0.40195100 |
| H | -17.31579678 | -8.90287308 | -0.53599200 |
| C | -22.93665078 | -0.89296108 | 0.06889600  |
| C | -22.89931078 | -2.29218208 | -0.00134100 |
| C | -24.14272678 | -0.20335308 | 0.16474800  |
| C | -24.06696378 | -3.05074308 | 0.02151400  |
| C | -25.31002578 | -0.95925108 | 0.18752800  |

|   |              |             |             |
|---|--------------|-------------|-------------|
| H | -24.15751278 | 0.87996092  | 0.21880500  |
| C | -25.27265878 | -2.36369808 | 0.11686000  |
| H | -24.02450478 | -4.13327308 | -0.03335100 |
| H | -26.27041178 | -0.45947608 | 0.26136900  |
| H | -26.20497678 | -2.91857808 | 0.13769700  |
| C | -18.18530078 | 2.72182592  | 0.03045300  |
| C | -19.57896178 | 2.66801192  | 0.09574700  |
| C | -17.50040378 | 3.93065292  | 0.06910600  |
| C | -20.34747578 | 3.82161192  | 0.20276400  |
| C | -18.26573578 | 5.09159692  | 0.17643500  |
| H | -16.41683478 | 3.95844492  | 0.01764900  |
| C | -19.66738878 | 5.03844392  | 0.24215500  |
| H | -21.43009978 | 3.76947492  | 0.25312300  |
| H | -17.77160178 | 6.05741292  | 0.21020000  |
| H | -20.22848478 | 5.96380092  | 0.32535700  |
| C | -7.54637678  | 2.79853392  | 0.08916100  |
| C | -8.94037878  | 2.82020692  | 0.00679300  |
| C | -6.80892278  | 3.96895292  | 0.23104700  |
| C | -9.65572378  | 4.01114592  | 0.06241600  |
| C | -7.51943478  | 5.16736092  | 0.28638100  |
| H | -5.72604878  | 3.94264992  | 0.29505000  |
| C | -8.92141278  | 5.18796292  | 0.20359400  |
| H | -10.73900378 | 4.01278392  | -0.00160800 |
| H | -6.98238178  | 6.10427192  | 0.39575100  |
| H | -9.43959878  | 6.14051592  | 0.25138200  |
| C | -4.12533478  | -2.09259408 | -0.02509500 |
| C | -4.11781578  | -0.69227808 | 0.06752800  |
| C | -2.94036078  | -2.82722908 | 0.00624100  |
| C | -2.92505078  | 0.01904392  | 0.19499800  |
| C | -1.75235578  | -2.11845708 | 0.13379300  |
| H | -2.95945878  | -3.90938408 | -0.06679600 |
| C | -1.74482178  | -0.71296008 | 0.22694900  |
| H | -2.93255178  | 1.10151792  | 0.26548700  |
| H | -0.80911878  | -2.65429608 | 0.16264300  |
| H | -0.79591078  | -0.19568808 | 0.32542500  |
| C | -8.99675878  | -5.47778908 | -0.65325200 |
| C | -7.60633078  | -5.50214508 | -0.52486700 |
| C | -9.73970478  | -6.64157908 | -0.80986900 |
| C | -6.90111978  | -6.70050308 | -0.53622000 |
| C | -9.03808478  | -7.84642908 | -0.81589400 |
| H | -10.81783478 | -6.60605008 | -0.93235200 |
| C | -7.64044578  | -7.87470908 | -0.68015400 |
| H | -5.82085478  | -6.71481508 | -0.43481600 |
| H | -9.58059178  | -8.77989808 | -0.92774500 |

|   |             |             |             |
|---|-------------|-------------|-------------|
| H | -7.12822178 | -8.83158408 | -0.68963000 |
|---|-------------|-------------|-------------|

24

SCF energy in solution: -3136.238359

Free energy in solution: -3135.569237

|   |             |             |             |
|---|-------------|-------------|-------------|
| C | -3.13953495 | 0.58134552  | -0.00761020 |
| C | -1.74314095 | 0.58545652  | -0.00760820 |
| C | -3.52680195 | -0.83450148 | -0.00762220 |
| C | -1.34544595 | -0.82664748 | -0.00762020 |
| C | -6.60380395 | -2.87589248 | -0.00765020 |
| C | -6.60364095 | -4.27872848 | -0.00764720 |
| C | -5.21375495 | -2.43742548 | -0.00763820 |
| C | -5.21352695 | -4.71677448 | -0.00763320 |
| H | -3.43493295 | -3.57726848 | -0.00763120 |
| C | -3.13880695 | -7.73531248 | -0.00756420 |
| C | -1.74244095 | -7.73905748 | -0.00762320 |
| C | -3.52648595 | -6.31945248 | -0.00758220 |
| C | -1.34513495 | -6.32668048 | -0.00764620 |
| C | 1.72746005  | -4.29156948 | -0.00765920 |
| C | 1.72761205  | -2.86155548 | -0.00765320 |
| C | 0.34238905  | -4.72466748 | -0.00765620 |
| C | 0.34254205  | -2.42836548 | -0.00764020 |
| H | -1.42293295 | -3.57613048 | -0.00767720 |
| N | -0.07019295 | -5.97412748 | -0.00766620 |
| N | -0.07059695 | -1.17928748 | -0.00762820 |
| N | -4.81749295 | -1.19091948 | -0.00763520 |
| N | -4.81704895 | -5.96340248 | -0.00762320 |
| N | -4.44830995 | -3.57718248 | -0.00763420 |
| N | -2.44340895 | -5.51122548 | -0.00752320 |
| N | -0.40802395 | -3.57666848 | -0.00765820 |
| N | -2.44370895 | -1.64249848 | -0.00760120 |
| N | 2.82431605  | -5.04120748 | -0.00766420 |
| N | 2.82468605  | -2.11202348 | -0.00765120 |
| C | 8.78847805  | 0.58133552  | -0.00763420 |
| C | 7.39210405  | 0.58548552  | -0.00763920 |
| C | 9.17568705  | -0.83460048 | -0.00762520 |
| C | 6.99429805  | -0.82672348 | -0.00763320 |
| C | 12.25305305 | -2.87572948 | -0.00761920 |
| C | 12.25299805 | -4.27841248 | -0.00762620 |
| C | 10.86273505 | -2.43726648 | -0.00762620 |
| C | 10.86263005 | -4.71678048 | -0.00763920 |
| H | 9.08396805  | -3.57687048 | -0.00764920 |
| C | 8.78814105  | -7.73519348 | -0.00764020 |

|   |             |              |             |
|---|-------------|--------------|-------------|
| C | 7.39178005  | -7.73928348  | -0.00764720 |
| C | 9.17539605  | -6.31927648  | -0.00765820 |
| C | 6.99400005  | -6.32710248  | -0.00766820 |
| C | 3.92179405  | -4.29177548  | -0.00765920 |
| C | 3.92197305  | -2.86171248  | -0.00765320 |
| C | 5.30640005  | -4.72489948  | -0.00766120 |
| C | 5.30663005  | -2.42880648  | -0.00764820 |
| H | 7.07197105  | -3.57719448  | -0.00765820 |
| N | 5.71964205  | -5.97439848  | -0.00766920 |
| N | 5.71986205  | -1.17923748  | -0.00763920 |
| N | 10.46671005 | -1.19086948  | -0.00762120 |
| N | 10.46650705 | -5.96311048  | -0.00764920 |
| N | 10.09735305 | -3.57695948  | -0.00763920 |
| N | 8.09286205  | -5.51126748  | -0.00762720 |
| N | 6.05707905  | -3.57687848  | -0.00765620 |
| N | 8.09304905  | -1.64257748  | -0.00764520 |
| C | 9.51903105  | 1.76446252   | -0.00763520 |
| C | 6.66671305  | 1.77144352   | -0.00764520 |
| C | -1.01764995 | 1.77141152   | -0.00760120 |
| C | -3.86995695 | 1.76459952   | -0.00760520 |
| C | -7.79449295 | -2.15132748  | -0.00766120 |
| C | -7.79415295 | -5.00359348  | -0.00765520 |
| C | -3.86899295 | -8.91865948  | -0.00753220 |
| C | -1.01665595 | -8.92479348  | -0.00763820 |
| C | 6.66633305  | -8.92522648  | -0.00764020 |
| C | 9.51864705  | -8.91835748  | -0.00762520 |
| C | 13.44341305 | -5.00322948  | -0.00762220 |
| C | 13.44352005 | -2.15099548  | -0.00760620 |
| C | 8.79836505  | 2.95809052   | -0.00761520 |
| H | 9.32908705  | 3.90488952   | -0.00760220 |
| C | 7.39391505  | 2.96118452   | -0.00762020 |
| H | 6.86791705  | 3.91063652   | -0.00761120 |
| C | -1.74472395 | 2.96116852   | -0.00763020 |
| H | -1.21869495 | 3.91060352   | -0.00764320 |
| C | -3.14922395 | 2.95813352   | -0.00763220 |
| H | -3.67987495 | 3.90497552   | -0.00764620 |
| C | -8.98183595 | -2.87367648  | -0.00767320 |
| H | -9.93011995 | -2.34606248  | -0.00768420 |
| C | -8.98167495 | -4.28154848  | -0.00767020 |
| H | -9.92983395 | -4.80938248  | -0.00767820 |
| C | -3.14794695 | -10.11205848 | -0.00755420 |
| H | -3.67836695 | -11.05903048 | -0.00753220 |
| C | -1.74349295 | -10.11475148 | -0.00760520 |
| H | -1.21722595 | -11.06405448 | -0.00761920 |

|   |             |              |             |
|---|-------------|--------------|-------------|
| C | 7.39347705  | -10.11498648 | -0.00767920 |
| H | 6.86744805  | -11.06442148 | -0.00770020 |
| C | 8.79794005  | -10.11194748 | -0.00767120 |
| H | 9.32861805  | -11.05877148 | -0.00768820 |
| C | 14.63096805 | -4.28103448  | -0.00760220 |
| H | 15.57914905 | -4.80882948  | -0.00759520 |
| C | 14.63102205 | -2.87327448  | -0.00759520 |
| H | 15.57924305 | -2.34555148  | -0.00758120 |
| H | -4.95496795 | 1.75140652   | -0.00760620 |
| H | 0.06746905  | 1.75979552   | -0.00760020 |
| H | 5.58159305  | 1.75992952   | -0.00764920 |
| H | 10.60404005 | 1.75119252   | -0.00763220 |
| H | 13.42998505 | -1.06627648  | -0.00760120 |
| H | 13.42980505 | -6.08794748  | -0.00762720 |
| H | 10.60365605 | -8.90511748  | -0.00761820 |
| H | 5.58121405  | -8.91366948  | -0.00764420 |
| H | 0.06846005  | -8.91293848  | -0.00767320 |
| H | -4.95400595 | -8.90572048  | -0.00749120 |
| H | -7.78045995 | -6.08831348  | -0.00765220 |
| H | -7.78110195 | -1.06660448  | -0.00766520 |

TS2'

SCF energy in solution: -3250.959923

Free energy in solution: -3250.173967

|   |             |             |            |
|---|-------------|-------------|------------|
| C | -4.54907155 | -0.54376657 | 0.00000000 |
| C | -2.27932355 | -0.43658957 | 0.20006500 |
| C | -4.06758355 | 0.80058343  | 0.25732200 |
| C | 1.40904945  | -0.52136757 | 0.51046700 |
| C | 0.01431745  | -0.10530957 | 0.48747700 |
| C | 1.26956245  | 1.72375843  | 1.02063400 |
| H | -0.82665055 | 1.80497243  | 0.86350100 |
| C | 1.26320245  | 5.29049743  | 1.89977700 |
| C | 0.11883945  | 6.08234443  | 1.98680100 |
| C | 0.79030345  | 3.95022543  | 1.50450100 |
| C | -1.00529055 | 5.19480643  | 1.63019700 |
| C | -4.63532755 | 5.26868443  | 1.32244800 |
| C | -5.43425855 | 4.17017243  | 0.86517500 |
| C | -3.28192955 | 4.87087143  | 1.27338500 |
| C | -4.46314755 | 3.05929143  | 0.64223700 |
| H | -2.35485355 | 3.02382143  | 0.80719600 |
| N | -2.24951355 | 5.64255743  | 1.61761200 |
| N | -4.89231255 | 1.86112043  | 0.38152300 |
| N | -1.00809355 | -0.86739157 | 0.23180100 |

|   |              |             |             |
|---|--------------|-------------|-------------|
| N | 1.64562045   | 2.94879843  | 1.34958500  |
| N | 0.01551945   | 1.24861943  | 0.79826500  |
| N | -0.55781455  | 3.93586343  | 1.35079600  |
| N | -3.20833155  | 3.56617943  | 0.83147200  |
| N | -2.71869055  | 0.83652043  | 0.37303500  |
| N | -8.06549155  | 6.29760843  | 0.78839300  |
| N | -6.57651955  | 3.65885343  | 1.81427300  |
| C | -10.30808955 | -1.45158957 | 2.33710500  |
| C | -9.10242455  | -0.74771657 | 2.36060500  |
| C | -11.34647855 | -0.44815157 | 2.03941100  |
| C | -9.46225655  | 0.65206343  | 2.07417400  |
| C | -15.01862855 | -0.32387457 | 1.58085400  |
| C | -13.59376955 | 0.02159743  | 1.66587100  |
| C | -14.73560855 | 1.92780043  | 1.12302500  |
| H | -12.63127455 | 1.87743743  | 1.36656500  |
| C | -14.47848855 | 5.49725643  | 0.35376700  |
| C | -13.29713455 | 6.24068243  | 0.34147300  |
| C | -14.08133055 | 4.13031543  | 0.72558200  |
| C | -12.23076055 | 5.29386143  | 0.70832900  |
| C | -8.63485055  | 5.09938243  | 1.21202700  |
| C | -7.97668655  | 3.91752343  | 1.56210200  |
| C | -10.00695555 | 4.76752343  | 1.13978900  |
| C | -8.92043455  | 2.88277143  | 1.70562000  |
| H | -11.01280355 | 2.93782743  | 1.47028600  |
| N | -10.97918555 | 5.63301943  | 0.79723300  |
| N | -8.58469355  | 1.60990743  | 2.00381400  |
| N | -12.64635155 | -0.81976657 | 1.95409500  |
| N | -15.02336455 | 3.15300543  | 0.82338000  |
| N | -13.50189155 | 1.36358743  | 1.38241300  |
| N | -12.77506255 | 4.02387243  | 0.93056500  |
| N | -10.13221555 | 3.43256943  | 1.44813600  |
| N | -10.83605955 | 0.77118743  | 1.88641400  |
| N | -5.17492355  | 6.50988043  | 1.77353300  |
| H | -4.87625655  | 7.28003643  | 1.17754700  |
| H | -4.83150955  | 6.73746643  | 2.70395300  |
| H | -7.30148055  | 6.63962943  | 1.37724300  |
| H | -8.77408955  | 7.00310943  | 0.60878300  |
| N | -6.27333755  | 4.42346743  | -0.50617200 |
| H | -5.56460355  | 4.69667843  | -1.18883800 |
| H | -6.72499055  | 3.56071243  | -0.83084600 |
| H | -6.48026355  | 2.62200843  | 1.82651900  |
| H | -6.96334855  | 5.19966843  | -0.40070200 |
| C | 2.00607145   | -1.75892457 | 0.27413200  |
| C | 2.18111245   | 0.60532243  | 0.83626900  |

|   |              |             |             |
|---|--------------|-------------|-------------|
| C | 3.57042945   | 0.53311943  | 0.93777900  |
| C | 4.16383445   | -0.70038557 | 0.70272100  |
| C | 3.39022445   | -1.83084957 | 0.37527600  |
| H | 1.40388845   | -2.62516957 | 0.02213800  |
| H | 4.15278345   | 1.41267443  | 1.19059600  |
| H | 5.24200245   | -0.79976557 | 0.77125900  |
| H | 3.89020345   | -2.77766757 | 0.19869500  |
| C | -5.90059955  | -2.46482657 | -0.40305100 |
| C | -5.81932055  | -1.09506057 | -0.18336500 |
| C | -3.39444955  | -1.34322557 | -0.04051000 |
| C | -3.47791855  | -2.71835957 | -0.26436400 |
| C | -4.74264255  | -3.26683857 | -0.44440800 |
| H | -6.87233155  | -2.92855757 | -0.54374500 |
| H | -6.71144055  | -0.47545757 | -0.14716600 |
| H | -2.58248855  | -3.33062557 | -0.29420500 |
| H | -4.84490855  | -4.33266657 | -0.62194600 |
| C | -15.67101755 | -1.53371257 | 1.77249100  |
| C | -17.05832055 | -1.53864857 | 1.61987400  |
| C | -17.75843655 | -0.37052557 | 1.28764300  |
| C | -17.09605255 | 0.84327843  | 1.09654700  |
| C | -15.71714055 | 0.84152443  | 1.24962200  |
| H | -15.11818555 | -2.43062057 | 2.03009800  |
| H | -17.60827855 | -2.46310357 | 1.76064000  |
| H | -18.83686855 | -0.41356057 | 1.17766900  |
| H | -17.62736555 | 1.75334143  | 0.83980800  |
| C | -7.93644555  | -2.76567757 | 2.82080300  |
| C | -9.14576755  | -3.47013957 | 2.80021200  |
| C | -10.35964855 | -2.81946457 | 2.55650900  |
| C | -7.89537455  | -1.38453057 | 2.60253000  |
| H | -7.01089155  | -3.30224257 | 3.00247800  |
| H | -9.13804255  | -4.54097157 | 2.97473000  |
| H | -11.30218755 | -3.35616257 | 2.53610500  |
| H | -6.95583755  | -0.84108957 | 2.60844500  |
| C | 0.18724645   | 7.42061143  | 2.34521000  |
| C | 1.45403245   | 7.94425243  | 2.61725900  |
| C | 2.60335845   | 7.14764643  | 2.53017800  |
| C | 2.52491245   | 5.80025643  | 2.16837400  |
| H | -0.70777455  | 8.03054843  | 2.40979100  |
| H | 1.55315745   | 8.98682943  | 2.90169500  |
| H | 3.57064845   | 7.58826743  | 2.74865500  |
| H | 3.40795945   | 5.17387043  | 2.09849500  |
| C | -15.70768855 | 6.06820143  | 0.05383400  |
| C | -15.71647755 | 7.42791943  | -0.26317400 |
| C | -14.53167155 | 8.17629743  | -0.27526900 |



|   |              |            |             |
|---|--------------|------------|-------------|
| C | -13.29933555 | 7.59246843 | 0.02810200  |
| H | -16.61793055 | 5.47818743 | 0.06774200  |
| H | -16.65455655 | 7.91689343 | -0.50388400 |
| H | -14.57585255 | 9.23132243 | -0.52533900 |
| H | -12.38139855 | 8.17068343 | 0.02076600  |
| H | -6.28996955  | 4.00149243 | 2.73812400  |

3'

SCF energy in solution: -3194.44236022

Free energy in solution: -3193.577416

|   |             |            |             |
|---|-------------|------------|-------------|
| C | -2.93103444 | 1.63129971 | 0.00000000  |
| C | -5.04199944 | 1.81444771 | 0.85389000  |
| C | -3.56571244 | 2.92045171 | -0.31052200 |
| C | -8.41563744 | 1.81465571 | 2.37321300  |
| C | -7.19502644 | 2.18316471 | 1.64720800  |
| C | -8.64917444 | 3.94214671 | 1.49139000  |
| H | -6.72366044 | 3.95496971 | 0.60369100  |
| C | -9.20786144 | 7.31206271 | 0.17039000  |
| C | -8.29346144 | 8.04737671 | -0.58698700 |
| C | -8.53885044 | 6.03740471 | 0.46782000  |
| C | -7.10725344 | 7.18823071 | -0.71772300 |
| C | -3.77824244 | 7.11503871 | -2.21126200 |
| C | -2.93067544 | 6.02090671 | -2.06714200 |
| C | -4.95542944 | 6.76661171 | -1.48673600 |
| C | -3.54664844 | 5.02551771 | -1.28971000 |
| H | -5.46243244 | 5.02570671 | -0.40660200 |
| N | -6.03763844 | 7.54821171 | -1.37171000 |
| N | -2.97054644 | 3.84370371 | -1.01089300 |
| N | -6.14675244 | 1.42076671 | 1.52703600  |
| N | -9.17808844 | 5.08723971 | 1.20014300  |
| N | -7.40414244 | 3.44812171 | 1.15389300  |
| N | -7.31783544 | 5.97879971 | -0.05350500 |
| N | -4.76900444 | 5.51065771 | -0.95826100 |
| N | -4.83922444 | 2.97782971 | 0.23564000  |
| N | -1.03533144 | 8.56566471 | -1.19078000 |
| N | -1.61952144 | 5.80325371 | -2.65065900 |
| C | 2.72316756  | 1.25008571 | -1.67053400 |
| C | 1.56200156  | 1.80348971 | -2.21265900 |
| C | 3.37585056  | 2.34535771 | -0.92963700 |
| C | 1.55208756  | 3.20833571 | -1.76492200 |
| C | 6.45092356  | 2.88217571 | 1.06171700  |
| C | 5.16057256  | 3.05502171 | 0.38241600  |
| C | 5.68634656  | 5.04342971 | 1.38300100  |

|   |              |             |             |
|---|--------------|-------------|-------------|
| H | 3.90788656   | 4.75293871  | 0.27001000  |
| C | 4.62437456   | 8.48934871  | 2.01475200  |
| C | 3.44993956   | 9.07367971  | 1.53799000  |
| C | 4.62003856   | 7.11340371  | 1.49324300  |
| C | 2.78190356   | 8.02865371  | 0.74370700  |
| C | -0.23030344  | 7.41748871  | -1.20724500 |
| C | -0.47716444  | 6.20838571  | -1.84554700 |
| C | 1.03056756   | 7.25875371  | -0.58017600 |
| C | 0.57439456   | 5.31145071  | -1.60197600 |
| H | 2.35667756   | 5.61693371  | -0.51612900 |
| N | 1.64352756   | 8.21325471  | 0.14472700  |
| N | 0.59328456   | 4.03935471  | -2.05177400 |
| N | 4.55333756   | 2.12778071  | -0.29537000 |
| N | 5.64584256   | 6.27068871  | 1.79140600  |
| N | 4.76931756   | 4.35205071  | 0.61641800  |
| N | 3.54833256   | 6.85841071  | 0.75429100  |
| N | 1.47746856   | 5.98844971  | -0.84560700 |
| N | 2.68030156   | 3.47580371  | -0.99432000 |
| N | -3.58110844  | 8.25507071  | -2.96302400 |
| H | -2.70262644  | 8.73499571  | -2.78033400 |
| H | -4.37920344  | 8.88013571  | -2.93631900 |
| H | -0.50872744  | 9.34426371  | -0.80108500 |
| H | -1.86741744  | 8.42736671  | -0.61880100 |
| H | -1.49803344  | 4.77858371  | -2.77643500 |
| C | -8.74633844  | 0.65514971  | 3.06216700  |
| C | -9.30497644  | 2.89034971  | 2.27908000  |
| C | -10.56016144 | 2.84806671  | 2.87074200  |
| C | -10.89808344 | 1.68564471  | 3.56405800  |
| C | -10.00632444 | 0.60707071  | 3.65821500  |
| H | -8.04760544  | -0.17184929 | 3.12762500  |
| H | -11.24160944 | 3.68814971  | 2.79122900  |
| H | -11.86969444 | 1.61142071  | 4.04105300  |
| H | -10.30551644 | -0.28035029 | 4.20589700  |
| C | -1.41181444  | -0.18612529 | 0.16455400  |
| C | -1.68377744  | 1.10415671  | -0.29677500 |
| C | -3.87483344  | 0.91819471  | 0.73974600  |
| C | -3.61225944  | -0.36247829 | 1.20574700  |
| C | -2.36092844  | -0.90728329 | 0.90229900  |
| H | -0.44764044  | -0.63699629 | -0.05196000 |
| H | -0.95272844  | 1.67646271  | -0.85929500 |
| H | -4.34946844  | -0.91286129 | 1.78074100  |
| H | -2.11599344  | -1.90675629 | 1.24639500  |
| C | 7.28857656   | 1.77901771  | 1.14917500  |
| C | 8.46981856   | 1.93384071  | 1.87577300  |

|   |              |             |             |
|---|--------------|-------------|-------------|
| C | 8.79320156   | 3.15272371  | 2.48844400  |
| C | 7.94691056   | 4.25860471  | 2.39581300  |
| C | 6.77364256   | 4.09811671  | 1.67232700  |
| H | 7.02783156   | 0.84185671  | 0.66942200  |
| H | 9.15369056   | 1.09690471  | 1.96939200  |
| H | 9.72106356   | 3.23531671  | 3.04454700  |
| H | 8.18724356   | 5.20674671  | 2.86451800  |
| C | 1.02271256   | -0.29862129 | -3.18621200 |
| C | 2.18818856   | -0.85209529 | -2.63997900 |
| C | 3.06222056   | -0.08046729 | -1.86973200 |
| C | 0.69137656   | 1.04372671  | -2.98147800 |
| H | 0.36630156   | -0.92577829 | -3.78067400 |
| H | 2.41424956   | -1.89744829 | -2.82262200 |
| H | 3.96857256   | -0.49705229 | -1.44320700 |
| H | -0.21242844  | 1.47233271  | -3.40328600 |
| C | -8.59914844  | 9.32015871  | -1.05028500 |
| C | -9.85663644  | 9.83325571  | -0.72719200 |
| C | -10.77346244 | 9.09369271  | 0.03376600  |
| C | -10.46103444 | 7.81478071  | 0.49615000  |
| H | -7.88837344  | 9.88957871  | -1.63988700 |
| H | -10.13388244 | 10.82446771 | -1.07112700 |
| H | -11.74143644 | 9.52627571  | 0.26412700  |
| H | -11.16216144 | 7.23244871  | 1.08460400  |
| C | 5.52003156   | 9.18843471  | 2.81210700  |
| C | 5.19776056   | 10.51163171 | 3.12013600  |
| C | 4.01930456   | 11.10022071 | 2.64179100  |
| C | 3.12373056   | 10.38794271 | 1.84045200  |
| H | 6.42927956   | 8.72172871  | 3.17588100  |
| H | 5.86889056   | 11.09725371 | 3.73959000  |
| H | 3.80082656   | 12.13115771 | 2.90067700  |
| H | 2.21087056   | 10.84116671 | 1.46865700  |
| H | -1.58588544  | 6.24244171  | -3.58059000 |

TS21'

SCF energy in solution: -3192.719185

Free energy in solution: -3192.017246

|   |             |             |             |
|---|-------------|-------------|-------------|
| C | -2.13178299 | 0.16795865  | 0.00000000  |
| C | -4.26049799 | 0.13772065  | 0.48666100  |
| C | 0.90097701  | -1.84247835 | -0.53278600 |
| C | 0.94017301  | -3.24866435 | -0.42980800 |
| C | -0.45120399 | -1.42848335 | -0.25606300 |
| C | -0.38774299 | -3.69224135 | -0.09043400 |
| H | -2.15173799 | -2.57507335 | 0.22580000  |

|   |              |             |             |
|---|--------------|-------------|-------------|
| C | -1.98375899  | -5.32146835 | 0.40063100  |
| C | -4.11075299  | -5.32754535 | 0.88108200  |
| C | -7.22558699  | -3.37356535 | 1.50986300  |
| C | -7.25850799  | -1.88913935 | 1.26201500  |
| C | -5.80819499  | -3.75228635 | 1.11723800  |
| C | -5.89258099  | -1.44777935 | 0.97488300  |
| H | -4.14407299  | -2.57425535 | 0.61408300  |
| N | -5.39413399  | -4.97372135 | 1.15074800  |
| N | -5.52103299  | -0.21691535 | 0.80361300  |
| N | -0.88938999  | -0.17424735 | -0.25477700 |
| N | -0.76004799  | -4.95008635 | 0.09588900  |
| N | -1.16496299  | -2.56564835 | -0.00196000 |
| N | -3.09449999  | -4.51457835 | 0.58229000  |
| N | -5.12898599  | -2.59483835 | 0.86818800  |
| N | -3.19668799  | -0.65839935 | 0.30437300  |
| N | -8.33122999  | -4.14936735 | 0.96807700  |
| N | -8.33799399  | -1.20111735 | 1.07773900  |
| C | -14.65873899 | 0.07988365  | 0.38632000  |
| C | -12.49798499 | 0.07826165  | 0.70400600  |
| C | -16.30827999 | -1.51605735 | 0.01500700  |
| C | -16.28831199 | -3.78852435 | -0.17862600 |
| H | -14.53702299 | -2.65150535 | 0.16391700  |
| C | -14.19612199 | -6.79453835 | -0.15795400 |
| C | -12.81196799 | -6.79912635 | 0.03926200  |
| C | -14.59702099 | -5.38779735 | -0.08115600 |
| C | -12.43738799 | -5.39668335 | 0.22917800  |
| C | -9.43075299  | -3.37269035 | 0.87954500  |
| C | -9.46162499  | -1.96870535 | 1.01506800  |
| C | -10.79136699 | -3.79744135 | 0.61635900  |
| C | -10.81818399 | -1.52717635 | 0.82312100  |
| H | -12.56615199 | -2.65372035 | 0.47445400  |
| N | -11.17848199 | -5.04091535 | 0.45010700  |
| N | -11.23605999 | -0.27261935 | 0.86934600  |
| N | -15.93112399 | -0.26935935 | 0.17414300  |
| N | -15.88097799 | -5.02694135 | -0.23045900 |
| N | -15.54075199 | -2.64891135 | 0.02531500  |
| N | -13.53547899 | -4.58528135 | 0.14817000  |
| N | -11.56309099 | -2.65326935 | 0.60946400  |
| N | -13.58099699 | -0.72860035 | 0.48198500  |
| N | -7.42616399  | -3.84497435 | 2.95274500  |
| H | -6.59854099  | -4.20997435 | 3.42760100  |
| H | -7.92875699  | -3.17355935 | 3.53565900  |
| C | -14.17547699 | -9.16195135 | -0.38675300 |
| C | -12.78315299 | -9.16583535 | -0.19066600 |

|   |              |              |             |
|---|--------------|--------------|-------------|
| C | -12.07994699 | -7.98319535  | 0.02517000  |
| C | -14.90294099 | -7.97438735  | -0.37401300 |
| H | -14.68868699 | -10.10396335 | -0.55261800 |
| H | -12.24967699 | -10.11103435 | -0.21071200 |
| H | -11.00487899 | -7.97345835  | 0.17325600  |
| H | -15.97724599 | -7.96047135  | -0.52658300 |
| C | -20.02420599 | -3.33837735  | -0.66412000 |
| C | -18.84290399 | -4.06295635  | -0.56051500 |
| C | -17.66845299 | -3.34677335  | -0.33380600 |
| C | -17.68050099 | -1.94899235  | -0.21495500 |
| C | -18.86542899 | -1.22155235  | -0.31902000 |
| C | -20.03587199 | -1.93526535  | -0.54494700 |
| H | -20.95900899 | -3.86068635  | -0.84066100 |
| H | -18.82166299 | -5.14377535  | -0.65102900 |
| H | -18.85941099 | -0.14077035  | -0.22545500 |
| H | -20.97896599 | -1.40551635  | -0.63227400 |
| C | -3.67073999  | -9.10277835  | 1.08474100  |
| C | -2.29874999  | -9.09977935  | 0.77941100  |
| C | -1.61348799  | -7.91229135  | 0.53069600  |
| C | -2.34113099  | -6.72804435  | 0.59911200  |
| C | -3.70513999  | -6.73230435  | 0.90695700  |
| C | -4.39630399  | -7.91549035  | 1.15198300  |
| H | -4.17040499  | -10.04883935 | 1.26698600  |
| H | -1.76617699  | -10.04455935 | 0.73396100  |
| H | -0.55542699  | -7.90272535  | 0.29018900  |
| H | -5.45782599  | -7.90534335  | 1.37762900  |
| C | 2.13066501   | -3.95516235  | -0.64722900 |
| C | 3.26107801   | -3.22351435  | -0.96503700 |
| C | 3.22160201   | -1.81274035  | -1.06820700 |
| C | 2.05010001   | -1.10829935  | -0.85523700 |
| H | 2.15085901   | -5.03681635  | -0.56658100 |
| H | 4.20082901   | -3.73738435  | -1.14043300 |
| H | 4.13166001   | -1.27790635  | -1.32036900 |
| H | 2.00801601   | -0.02700135  | -0.93231400 |
| C | -3.92092799  | 1.55308765   | 0.30234800  |
| C | -2.56057199  | 1.57260165   | -0.00957700 |
| C | -1.89209899  | 2.76670865   | -0.25362800 |
| C | -2.63771699  | 3.94285065   | -0.17458900 |
| C | -4.00657699  | 3.92089465   | 0.13805400  |
| C | -4.67217899  | 2.72004065   | 0.38191000  |
| H | -0.83450099  | 2.77508065   | -0.49612500 |
| H | -2.15342599  | 4.89665065   | -0.35911800 |
| H | -4.55295499  | 4.85732365   | 0.18847400  |
| H | -5.73000699  | 2.68565465   | 0.62170900  |

|   |              |             |            |
|---|--------------|-------------|------------|
| C | -14.28458199 | 1.49278365  | 0.54973700 |
| C | -12.90368199 | 1.49112465  | 0.75127200 |
| C | -12.19377799 | 2.66999865  | 0.94183300 |
| C | -12.92125399 | 3.86053565  | 0.92471900 |
| C | -14.31031099 | 3.86295065  | 0.72308700 |
| C | -15.01549699 | 2.67440365  | 0.53148900 |
| H | -11.11946899 | 2.65369765  | 1.09434800 |
| H | -12.40639299 | 4.80524965  | 1.06854700 |
| H | -14.84223299 | 4.80909165  | 0.71562500 |
| H | -16.08899399 | 2.66489065  | 0.37351500 |
| H | -8.18237799  | -4.60226535 | 2.27827100 |

22'

SCF energy in solution: -3192.795879

Free energy in solution: -3192.098636

|   |             |            |             |
|---|-------------|------------|-------------|
| C | -5.33591742 | 0.58139534 | 0.00000000  |
| C | -3.93961042 | 0.58233034 | -0.03183000 |
| C | -5.72890742 | 1.99519034 | -0.00361200 |
| C | -3.54760742 | 1.99545834 | -0.05568400 |
| C | -8.80023042 | 4.03719734 | 0.05587400  |
| C | -8.80026242 | 5.44163334 | 0.05405800  |
| C | -7.41402042 | 3.60061334 | 0.02982700  |
| C | -7.41406342 | 5.87823834 | 0.02706500  |
| H | -5.63570242 | 4.73956334 | -0.00576700 |
| C | -5.33627842 | 8.89769534 | -0.00614800 |
| C | -3.93996542 | 8.89683734 | -0.03472100 |
| C | -5.72908742 | 7.48374934 | -0.00814600 |
| C | -3.54768842 | 7.48365634 | -0.05566800 |
| C | -0.46860542 | 5.45385234 | -0.11599300 |
| C | -0.46875942 | 4.02532034 | -0.11992000 |
| C | -1.85894942 | 5.88566334 | -0.11194000 |
| C | -1.85916742 | 3.59379334 | -0.11678200 |
| H | -3.62265242 | 4.73987534 | -0.11471300 |
| N | -2.26657642 | 7.13124234 | -0.08481900 |
| N | -2.26641342 | 2.34818734 | -0.08859000 |
| N | -7.01327542 | 2.35096234 | 0.02518900  |
| N | -7.01347242 | 7.12797934 | 0.01982300  |
| N | -6.64902942 | 4.73947734 | 0.01380300  |
| N | -4.64046842 | 6.67233834 | -0.03886300 |
| N | -2.60851442 | 4.73975434 | -0.13748800 |
| N | -4.64031642 | 2.80664734 | -0.03752000 |
| N | 0.62163058  | 6.20321934 | -0.09308800 |
| N | 0.62094458  | 3.27528234 | -0.09919200 |

|   |             |             |             |
|---|-------------|-------------|-------------|
| C | 6.58566458  | 0.57970534  | 0.01999900  |
| C | 5.18964958  | 0.57601234  | -0.01025200 |
| C | 6.97310258  | 1.99560334  | 0.03194300  |
| C | 4.79190658  | 1.98836434  | -0.01506300 |
| C | 10.05060458 | 4.03588534  | 0.10221500  |
| C | 10.05086258 | 5.43833034  | 0.10430400  |
| C | 8.66033758  | 3.59750234  | 0.07125300  |
| C | 8.66076158  | 5.87732234  | 0.07466400  |
| H | 6.88221658  | 4.73784934  | 0.03369900  |
| C | 6.58723658  | 8.89608834  | 0.03297600  |
| C | 5.19123058  | 8.90035434  | 0.00291600  |
| C | 6.97418358  | 7.47999834  | 0.04032300  |
| C | 4.79299858  | 7.48814834  | -0.00647000 |
| C | 1.72342958  | 5.45156534  | -0.07435600 |
| C | 1.72319558  | 4.02637134  | -0.07689500 |
| C | 3.10603158  | 5.88537634  | -0.04479500 |
| C | 3.10553058  | 3.59192534  | -0.04849900 |
| H | 4.87267258  | 4.73825434  | -0.00986000 |
| N | 3.51952058  | 7.13580534  | -0.03371300 |
| N | 3.51854858  | 2.34130434  | -0.04127800 |
| N | 8.26458558  | 2.35141234  | 0.06068700  |
| N | 8.26551558  | 7.12362934  | 0.06788500  |
| N | 7.89533358  | 4.73760134  | 0.05632800  |
| N | 5.89257858  | 6.67234734  | 0.01657400  |
| N | 3.85842358  | 4.73850834  | -0.03088300 |
| N | 5.89178858  | 2.80368734  | 0.01063100  |
| C | 7.31581158  | -0.60363266 | 0.03227000  |
| C | 4.46437058  | -0.60987966 | -0.03007800 |
| C | -3.20919642 | -0.60106166 | -0.03839800 |
| C | -6.06041142 | -0.60552766 | 0.02785100  |
| C | -9.99311442 | 3.31308434  | 0.07929200  |
| C | -9.99314642 | 6.16579134  | 0.07565800  |
| C | -6.06098142 | 10.08450134 | 0.01837500  |
| C | -3.20957542 | 10.08016134 | -0.04088000 |
| C | 4.46628358  | 10.08648734 | -0.01276800 |
| C | 7.31776658  | 10.07912934 | 0.04910700  |
| C | 11.24104058 | 6.16289734  | 0.13139000  |
| C | 11.24052758 | 3.31082234  | 0.12713000  |
| C | 6.59523958  | -1.79712466 | 0.01290700  |
| H | 7.12583058  | -2.74396866 | 0.02132800  |
| C | 5.19108858  | -1.79983066 | -0.01790400 |
| H | 4.66488858  | -2.74906766 | -0.03307000 |
| C | -3.93041342 | -1.79373166 | -0.01045900 |
| H | -3.40047542 | -2.74100766 | -0.01480000 |

|   |              |             |             |
|---|--------------|-------------|-------------|
| C | -5.33486942  | -1.79589766 | 0.02221700  |
| H | -5.86166942  | -2.74473866 | 0.04272300  |
| C | -11.17891142 | 4.03464334  | 0.10088000  |
| H | -12.12717542 | 3.50720434  | 0.11934800  |
| C | -11.17893642 | 5.44427734  | 0.09908600  |
| H | -12.12721142 | 5.97173634  | 0.11620800  |
| C | -5.33548142  | 11.27494734 | 0.01277400  |
| H | -5.86240042  | 12.22377534 | 0.03072100  |
| C | -3.93099442  | 11.27283334 | -0.01640700 |
| H | -3.40111142  | 12.22013934 | -0.02051100 |
| C | 5.19340058   | 11.27616734 | 0.00329800  |
| H | 4.66749258   | 12.22561234 | -0.00847900 |
| C | 6.59754258   | 11.27290934 | 0.03385000  |
| H | 7.12843458   | 12.21955134 | 0.04541400  |
| C | 12.42825058  | 5.44046834  | 0.15628200  |
| H | 13.37624558  | 5.96817534  | 0.17784100  |
| C | 12.42799558  | 4.03275634  | 0.15418000  |
| H | 13.37580258  | 3.50464734  | 0.17415400  |
| H | -7.14522742  | -0.59705966 | 0.05202600  |
| H | -2.12442242  | -0.58471766 | -0.06532300 |
| H | 3.37952658   | -0.59818366 | -0.05475100 |
| H | 8.40057458   | -0.59065166 | 0.05556600  |
| H | 11.22675858  | 2.22611534  | 0.12511500  |
| H | 11.22764658  | 7.24761034  | 0.13261300  |
| H | 8.40252658   | 10.06574434 | 0.07224600  |
| H | 3.38142858   | 10.07518034 | -0.03713100 |
| H | -2.12473742  | 10.06374134 | -0.06455700 |
| H | -7.14584742  | 10.07597734 | 0.04014300  |
| H | -9.98008942  | 7.25053834  | 0.07358800  |
| H | -9.98006342  | 2.22833534  | 0.07996900  |
| N | -1.39680442  | 4.63347134  | 2.78797100  |
| H | -2.33607342  | 4.69673334  | 3.16938000  |
| H | -0.84438542  | 5.36265134  | 3.22915000  |
| H | -1.01232842  | 3.74032634  | 3.08223800  |

TS2''

SCF energy in solution: -1777.188462

Free energy in solution: -1776.787721

|   |             |            |             |
|---|-------------|------------|-------------|
| N | -2.28682175 | 2.08010333 | 0.00000000  |
| N | 0.36389525  | 0.66505233 | -0.01946300 |
| C | 4.35305425  | 5.71699833 | 0.08948900  |
| C | 3.36592225  | 3.77135833 | 0.07059700  |
| C | 3.98038425  | 9.40430233 | 0.13792100  |



|   |             |             |             |
|---|-------------|-------------|-------------|
| C | 2.73732125  | 10.04857833 | 0.13939200  |
| C | 3.72851625  | 7.95913633  | 0.11664500  |
| C | 1.70375125  | 9.01177033  | 0.11907900  |
| H | 1.89404725  | 6.90557333  | 0.09539700  |
| C | -1.93088275 | 8.59303233  | 0.03845100  |
| C | -2.59741275 | 7.36334933  | 0.04084000  |
| C | -0.50087275 | 8.27120233  | 0.09388200  |
| C | -1.52641675 | 6.35695533  | 0.11698800  |
| C | -1.07774475 | 2.67752433  | 0.04641400  |
| C | 0.16680225  | 2.04322333  | 0.07227100  |
| C | -0.83193875 | 4.11162133  | 0.10029000  |
| C | 1.14856925  | 3.05293333  | 0.08287900  |
| H | 0.98692425  | 5.17548533  | 0.11588700  |
| N | -1.77559475 | 5.04530733  | 0.15028200  |
| N | 2.46637625  | 2.82502733  | 0.06942700  |
| N | 4.64376525  | 7.04240533  | 0.10738100  |
| N | 0.41897925  | 9.24724033  | 0.10730500  |
| N | 2.35532725  | 7.80594233  | 0.10791700  |
| N | -0.29348075 | 6.93673233  | 0.12395900  |
| N | 0.51256925  | 4.28539033  | 0.08232700  |
| N | 3.14966425  | 5.14685233  | 0.08914200  |
| H | -3.11200175 | 2.58088733  | -0.33605100 |
| H | -2.27008575 | 1.08468133  | -0.19228200 |
| H | 1.33153625  | 0.44043333  | -0.22716400 |
| C | 5.44058025  | 4.72654933  | 0.06956500  |
| C | 4.80911625  | 3.48217433  | 0.05804700  |
| C | 5.53513225  | 2.30158733  | 0.03803100  |
| C | 6.92980925  | 2.41214133  | 0.02951600  |
| C | 7.56176125  | 3.66105933  | 0.04094900  |
| C | 6.82150925  | 4.84769233  | 0.06135500  |
| H | 5.04163725  | 1.33561133  | 0.02937200  |
| H | 7.53645425  | 1.51277533  | 0.01362200  |
| H | 8.64564125  | 3.70626533  | 0.03369000  |
| H | 7.30149925  | 5.82044533  | 0.07020700  |
| C | 3.82782625  | 12.15761833 | 0.17343000  |
| C | 2.63473825  | 11.43288533 | 0.15696900  |
| C | 5.16879025  | 10.11900833 | 0.15383000  |
| C | 5.07194625  | 11.51240833 | 0.17187200  |
| H | 3.79426525  | 13.24175133 | 0.18756200  |
| H | 1.66646625  | 11.92152833 | 0.15783100  |
| H | 6.12685325  | 9.61065533  | 0.15214600  |
| H | 5.97720925  | 12.11000733 | 0.18482400  |
| C | -4.00462675 | 9.73487633  | -0.15755600 |
| C | -4.67173375 | 8.50626533  | -0.18375200 |

|   |             |             |             |
|---|-------------|-------------|-------------|
| C | -3.97779175 | 7.29381633  | -0.09092700 |
| C | -2.61074275 | 9.79703333  | -0.05410600 |
| H | -4.57830775 | 10.65242133 | -0.23262400 |
| H | -5.75181075 | 8.49247933  | -0.28450400 |
| H | -4.50306975 | 6.34577633  | -0.13479300 |
| H | -2.07840975 | 10.74218733 | -0.05657600 |
| O | -4.53547675 | 3.68218833  | -0.37030500 |
| H | -5.49396675 | 3.69559533  | -0.20476300 |
| O | -4.02058775 | 4.46597333  | 1.26176000  |
| H | -3.11504675 | 4.69965433  | 0.79146600  |
| H | 0.07307025  | 0.15696833  | 0.81042400  |
| H | -3.89056975 | 3.63906933  | 1.75624200  |

3''

SCF energy in solution: -416.69521062

Free energy in solution: -416.62953762

|   |             |             |            |
|---|-------------|-------------|------------|
| N | -4.97347473 | 1.15384614  | 0.00000000 |
| N | -2.09794173 | -0.05403186 | 0.31484200 |
| C | 1.15673327  | 5.39995614  | 0.75178500 |
| C | 0.44555127  | 3.33817414  | 0.62995500 |
| C | 0.33839827  | 9.02821314  | 0.84042400 |
| C | -0.97487673 | 9.51035314  | 0.81689600 |
| C | 0.27145627  | 7.55978714  | 0.79257400 |
| C | -1.86901073 | 8.35110214  | 0.75232200 |
| H | -1.43401273 | 6.29207914  | 0.69345900 |
| C | -5.42539973 | 7.48765114  | 0.63419000 |
| C | -5.92246373 | 6.18944714  | 0.52671300 |
| C | -3.95645073 | 7.34824114  | 0.63553500 |
| C | -4.73060173 | 5.32153114  | 0.46214200 |
| C | -3.86762473 | 1.72622914  | 0.21360700 |
| C | -2.47356473 | 1.23164014  | 0.34348600 |
| C | -3.76063173 | 3.22815714  | 0.32579700 |
| C | -1.65815773 | 2.33797014  | 0.42523300 |
| H | -2.08776573 | 4.43738514  | 0.48407700 |
| N | -4.83237573 | 4.01514914  | 0.34028900 |
| N | -0.32104673 | 2.30023414  | 0.53374300 |
| N | 1.28048527  | 6.76429514  | 0.80254200 |
| N | -3.17799273 | 8.43305114  | 0.71993600 |
| N | -1.08281173 | 7.24007314  | 0.74097400 |
| N | -3.57581973 | 6.05815614  | 0.53721200 |
| N | -2.47781473 | 3.50431314  | 0.39364600 |
| N | 0.04650927  | 4.69012214  | 0.64505600 |
| H | -6.34545673 | 2.84990014  | 1.30616900 |

|   |             |             |             |
|---|-------------|-------------|-------------|
| H | -4.88095273 | 0.13729214  | -0.07863000 |
| H | -1.11790173 | -0.26106686 | 0.45648100  |
| C | 2.36253827  | 4.56494514  | 0.81464700  |
| C | 1.90924027  | 3.24747714  | 0.73984300  |
| C | 2.79298927  | 2.17804514  | 0.77060400  |
| C | 4.15291627  | 2.47732614  | 0.88126900  |
| C | 4.60614527  | 3.80156214  | 0.95692300  |
| C | 3.71215127  | 4.87302814  | 0.92429500  |
| H | 2.44164427  | 1.15351614  | 0.71061700  |
| H | 4.87650727  | 1.66925214  | 0.90890400  |
| H | 5.67055627  | 3.99307714  | 1.04150800  |
| H | 4.05078927  | 5.90201614  | 0.98074700  |
| C | -0.16558973 | 11.73970714 | 0.91109100  |
| C | -1.25578373 | 10.86873014 | 0.85157900  |
| C | 1.42408227  | 9.88673314  | 0.89962900  |
| C | 1.14901627  | 11.25709814 | 0.93452600  |
| H | -0.33730373 | 12.81030714 | 0.93969700  |
| H | -2.27858473 | 11.22909614 | 0.83277200  |
| H | 2.43917527  | 9.50519614  | 0.91732700  |
| H | 1.97055227  | 11.96410414 | 0.98070700  |
| C | -7.63981673 | 8.33686014  | 0.69261500  |
| C | -8.13840073 | 7.03691514  | 0.58776100  |
| C | -7.28022173 | 5.93013114  | 0.50229100  |
| C | -6.25976973 | 8.58692114  | 0.71848100  |
| H | -8.33448673 | 9.16760614  | 0.75615000  |
| H | -9.21177873 | 6.88064114  | 0.57334900  |
| H | -7.66594773 | 4.91938414  | 0.42629900  |
| H | -5.86252273 | 9.59291014  | 0.80086700  |
| O | -6.57913773 | 2.68000914  | 2.23281900  |
| H | -7.23949473 | 1.97934114  | 2.23094700  |
| O | -3.91000873 | 2.18892414  | 2.85665300  |
| H | -4.87525673 | 2.33427814  | 2.89162600  |
| H | -2.75670573 | -0.78894586 | 0.52299300  |
| H | -3.56580673 | 2.36044414  | 3.73862300  |

CF<sub>3</sub>COOH

SCF energy in solution: -526.8101468

Free energy in solution: -526.8013738

|   |             |            |             |
|---|-------------|------------|-------------|
| C | -4.23076917 | 1.97612729 | 0.00000000  |
| C | -5.76548317 | 2.13654429 | 0.00001600  |
| O | -6.31815017 | 3.19733529 | -0.00000500 |
| O | -6.34350517 | 0.93818129 | -0.00001300 |

|   |             |            |             |
|---|-------------|------------|-------------|
| H | -7.30641617 | 1.05903129 | 0.00004200  |
| F | -3.83647017 | 1.29898729 | -1.08307700 |
| F | -3.83645817 | 1.29976929 | 1.08357800  |
| F | -3.64140117 | 3.16364029 | -0.00043100 |

H<sub>2</sub>O

SCF energy in solution: -76.43140526

Free energy in solution: -76.42807826

|   |             |            |             |
|---|-------------|------------|-------------|
| O | -2.74535805 | 0.99469495 | 0.00000000  |
| H | -3.51401205 | 0.41675995 | 0.00002400  |
| H | -1.97670405 | 0.41675995 | -0.00000100 |

H<sub>2</sub>O<sub>2</sub>

SCF energy in solution: -151.5479624

Free energy in solution: -151.5430234

|   |             |             |            |
|---|-------------|-------------|------------|
| O | -4.36339516 | 0.80901856  | 0.00000000 |
| H | -4.01676816 | -0.09333544 | 0.00000900 |
| O | -5.77132316 | 0.52528256  | 0.00000000 |
| H | -6.11795016 | 1.42763656  | 0.00002600 |

H<sub>3</sub>O<sub>2</sub><sup>+</sup>

SCF energy in solution: -151.9175769

Free energy in solution: -151.9000009

|   |             |             |             |
|---|-------------|-------------|-------------|
| O | -3.21997481 | 0.40861523  | -0.14263973 |
| H | -3.58132881 | 0.40623323  | 0.77207827  |
| O | -1.81615981 | 0.40802023  | 0.11851027  |
| H | -1.45212481 | -0.40719377 | -0.30510973 |
| H | -1.45223381 | 1.22491423  | -0.30197073 |

NH<sub>3</sub>

SCF energy in solution: -56.55423829

Free energy in solution: -56.53752429

|   |             |            |             |
|---|-------------|------------|-------------|
| N | -1.52519892 | 0.78249336 | 0.00000000  |
| H | -1.52519892 | 1.73025836 | -0.35972000 |
| H | -2.34598692 | 0.30861136 | -0.35972000 |
| H | -0.70441092 | 0.30861136 | -0.35972000 |

O<sub>2</sub>

SCF energy in solution: -150.3140069

Free energy in solution: -150.3299209

|   |             |            |             |
|---|-------------|------------|-------------|
| ○ | -3.03713523 | 1.04774534 | 0.00000000  |
| ○ | -3.03713523 | 1.04774534 | -1.19799800 |
